# Supplementary material for: De novo genome assembly of Camptotheca acuminata, a natural source of the anti-cancer compound camptothecin
Source: PubMed Central journal article supplement (PMC5737489; doi:10.1093/gigascience/gix065), 2017-07-24

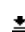

1  
2  
3  
4  
5  
6  
7  
8  
9  
10  
11  
12  
13  
14  
15  
16  
17  
18  
19  
20  
21  
22  
23  
24  
25  
26  
27  
28  
29  
30  
31  
32  
33  
34  
35  
36  
37  
38  
39  
40  
41  
42  
43  
44  
45  
46  
47  
48  
49  
50  
51  
52  
53  
54  
55  
56  
57  
58  
59  
60  
61  
62  
63  
64  
65

1 ***De novo* genome assembly of *Camptotheca acuminata*, a natural source of the anti-cancer**  
2 **compound camptothecin**

3 Dongyan Zhao<sup>1</sup>, John P. Hamilton<sup>1</sup>, Gina M. Pham<sup>1</sup>, Emily Crisovan<sup>1</sup>, Krystle Wiegert-Rininger<sup>1</sup>,  
4 Brieanne Vaillancourt<sup>1</sup>, Dean DellaPenna<sup>2</sup>, and C. Robin Buell<sup>1\*</sup>

5 <sup>1</sup>Department of Plant Biology, Michigan State University, East Lansing, MI 48824 USA

6 <sup>2</sup>Department of Biochemistry & Molecular Biology, Michigan State University, East Lansing, MI  
7 48824 USA

8 **Email addresses:** Dongyan Zhao <zhaodon4@msu.edu>, John P. Hamilton <jham@msu.edu>,  
9 Gina M. Pham <phamgina@msu.edu>, Emily Crisovan <pankeyem@msu.edu>, Krystle Wiegert-  
10 Rininger <wiegertk@msu.edu>, Brieanne Vaillancourt <vaillan6@msu.edu>, Dean Dellapenna  
11 <dellapen@msu.edu>, C Robin Buell <buell@msu.edu>

12 \*Correspondence should be addressed to: C. Robin Buell, buell@msu.edu

13

14 **Manuscript type:** Data note

15

16 **Note:** Reviewers can access the genome sequence and annotation using the following  
17 temporary URL: <http://datadryad.org/review?doi=doi:10.5061/dryad.nc8qr>.

1  
2  
3  
4  
5  
6  
7  
8  
9  
10  
11  
12  
13  
14  
15  
16  
17  
18  
19  
20  
21  
22  
23  
24  
25  
26  
27  
28  
29  
30  
31  
32  
33  
34  
35  
36  
37  
38  
39  
40  
41  
42  
43  
44  
45  
46  
47  
48  
49  
50  
51  
52  
53  
54  
55  
56  
57  
58  
59  
60  
61  
62  
63  
64  
65

18 **Abstract**

19 **Background:** *Camptotheca acuminata* is one of a limited number of species that produce  
20 camptothecin, a pentacyclic quinoline alkaloid with anti-cancer activity due to its ability to  
21 inhibit DNA topoisomerase. While transcriptome studies have been performed previously with  
22 various camptothecin-producing species, no genome sequence for a camptothecin-producing  
23 species is available to date.

24 **Findings:** We generated a high quality *de novo* genome assembly for *C. acuminata* representing  
25 403,174,860 bp on 1,394 scaffolds with an N50 scaffold size of 1,752 kbp. Quality assessments  
26 of the assembly revealed robust representation of the genome sequence including genic  
27 regions. Using a novel genome annotation method, we annotated 31,825 genes encoding  
28 40,332 gene models. Based on sequence identity and orthology with validated genes from  
29 *Catharanthus roseus* as well as Pfam searches, we identified candidate orthologs for genes  
30 potentially involved in camptothecin biosynthesis. Extensive gene duplication including tandem  
31 duplication was widespread in the *C. acuminata* genome with 3,315 genes belonging to 1,245  
32 tandem duplicated gene clusters.

33 **Conclusions:** To our knowledge, this is the first genome sequence for a camptothecin-producing  
34 species, and access to the *C. acuminata* genome will permit not only discovery of genes  
35 encoding the camptothecin biosynthetic pathway but also reagents that can be used for  
36 heterologous expression of camptothecin and camptothecin analogs with novel pharmaceutical  
37 applications.

1  
2  
3  
4  
5  
6  
7  
8  
9  
10  
11  
12  
13  
14  
15  
16  
17  
18  
19  
20  
21  
22  
23  
24  
25  
26  
27  
28  
29  
30  
31  
32  
33  
34  
35  
36  
37  
38  
39  
40  
41  
42  
43  
44  
45  
46  
47  
48  
49  
50  
51  
52  
53  
54  
55  
56  
57  
58  
59  
60  
61  
62  
63  
64  
65

38 **Keywords:** *Camptotheca acuminata*, camptothecin, genome assembly, genome annotation,  
39 tandem duplications

40  
41 **Data Description**

42 **Background information on camptothecin, a key anti-cancer natural product**

43 *Camptotheca acuminata* Decne, also known as the Chinese Happy Tree (Figure 1), is an eudicot  
44 asterid Cornales tropical tree species within the Nyssaceae family [1] that also contains *Nyssa*  
45 spp (tupelo) and *Davidia involucrate* (dove tree); no genome sequence is available for any  
46 member of this family. *C. acuminata* is one of a limited number of plant species that produce  
47 camptothecin, a pentacyclic quinoline alkaloid (Figure 2A) with anti-cancer activity due to its  
48 ability to inhibit DNA topoisomerase [2]. Due to poor solubility, derivatives such as irinotecan  
49 and topotecan, rather than camptothecin are currently in use as approved cancer drugs. The  
50 significance of these derivatives as therapeutics is highlighted by the listing of irinotecan on the  
51 World Health Organization Model List of Essential Medicines [3]. While transcriptome studies  
52 have been performed previously with various camptothecin-producing species including *C.*  
53 *acuminata* and *Ophiorrhiza pumila* (e.g., [4-6]), no genome sequence for a camptothecin-  
54 producing species is available to date. We report on the assembly and annotation of the *C.*  
55 *acuminata* genome, the characterization of genes implicated in camptothecin biosynthesis, and  
56 highlight the complexity of the gene complement in this species.

57 **RNA isolation, library construction, sequencing, and transcriptome assembly**

1  
2  
3  
4 58 Transcriptome assemblies were constructed using nine developmental RNA-sequencing (RNA-  
5  
6  
7 59 seq) datasets described in a previous study [4] that included immature bark, cotyledons,  
8  
9  
10 60 immature flower, immature fruit, mature fruit, mature leaf, root, upper stem, and lower stem.  
11  
12 61 Adapters and low-quality nucleotides were removed from the RNA-seq reads using Cutadapt  
13  
14 62 (v1.8) [7] and contaminating ribosomal RNA reads were removed. Cleaned reads from all nine  
15  
16  
17 63 libraries were assembled using Trinity (v20140717) [8] with a normalization factor of 50x using  
18  
19  
20 64 default parameters. Contaminant transcripts were identified by searching the *de novo*  
21  
22 65 transcriptome assembly against the National Center for Biotechnology Information (NCBI) non-  
23  
24  
25 66 redundant nucleotide database using BLAST+ (v2.2.30) [9, 10] with an E-value cutoff of 1e-5;  
26  
27  
28 67 transcripts with their best hits being a non-plant sequence were removed from the  
29  
30 68 transcriptome.

31  
32  
33  
34 69 For additional transcript support for use in a genome-guided transcriptome assembly to  
35  
36 70 support genome annotation, strand-specific RNA-seq reads were generated by isolating RNA  
37  
38  
39 71 from root tissues and sequencing of Kappa TruSeq Stranded libraries on an Illumina HiSeq 2500  
40  
41 72 platform generating 150 nt paired-end reads (BioSample ID: SAMN06229771). Root RNA-seq  
42  
43  
44 73 reads were assessed for quality using FASTQC (v0.11.2) [11] using default parameters and  
45  
46  
47 74 cleaned as described above.

#### 50 75 **DNA isolation, library construction, and sequencing**

51  
52  
53 76 The genome size of *C. acuminata* was estimated at 516 Mb using flow cytometry, suitable for  
54  
55  
56 77 *de novo* assembly using the Illumina platform. DNA was extracted from young leaves of *C.*  
57  
58  
59 78 *acuminata* at the vegetative growth stage using CTAB [12]. Multiple Illumina-compatible paired-

1  
2  
3  
4 79 end libraries (Table 1) with insert sizes ranging from 180-609 bp were constructed as described  
5  
6  
7 80 previously [13] and sequenced to 150 nt in paired-end mode on an Illumina HiSeq2000. Mate-  
8  
9  
10 81 pair libraries (Table 1) with size ranges of 1.3-8.9 kb were made using the Nextera Kit (Illumina,  
11  
12 82 San Diego CA) as per manufacturer's instructions and sequenced to 150 nt in paired-end mode  
13  
14  
15 83 on an Illumina HiSeq2000.

#### 18 84 **Genome assembly**

20  
21 85 Paired-end reads (Table 1) were assessed for quality using FASTQC (v0.11.2) [11] using default  
22  
23  
24 86 parameters, cleaned for adapters and low quality sequences using Cutadapt (v1.8) [7] and only  
25  
26  
27 87 reads in pairs with each read  $\geq 25$  nt were retained for genome assembly. Mate pair libraries  
28  
29  
30 88 (Table 1) were processed using NextClip (v1.3.1) [14] and only reads from Categories A, B, C  
31  
32 89 were used for the assembly. Using ALLPATHS-LG (v44837) [15] with default parameters, two  
33  
34  
35 90 paired-end read libraries (180 and 268 bp insert libraries) and all five mate pair libraries (Table  
36  
37 91 1) were used to generate an initial assembly of 403.2 Mb with an N50 contig size of 108 kbp  
38  
39  
40 92 and an N50 scaffold size of 1,752 kbp (Tables 1 and 2). Gaps (5,076) in this initial assembly were  
41  
42  
43 93 filled using SOAP GapCloser (v1.12r6) [16] with four independent paired-end libraries (352, 429,  
44  
45 94 585, and 609 bp inserts, Table 1); 12,468,362 bp of the estimated 16,471,841 bp of gaps was  
46  
47  
48 95 filled leaving a total of 3,825 gaps (3,772,191 Ns). The assembly was checked for contaminant  
49  
50 96 sequences based on alignments to the NCBI non-redundant nucleotide database using BLASTN  
51  
52  
53 97 (E-value =  $1e-5$ ) [10]; a single scaffold of 5,156 bp that matched a bacterium sequence with  
54  
55 98 100% coverage and 100% identity was removed. Subsequently, five scaffolds less than 1 kbp  
56  
57  
58  
59  
60  
61  
62  
63  
64  
65

1  
2  
3  
4 99 were removed resulting in the final assembly of 403,174,860 bp comprised of 1,394 scaffolds  
5  
6  
7 100 with an N50 scaffold size of 1,752 kbp (Tables 1 and 2).  
8  
9

10 101 Quality assessments revealed a robust high quality assembly with 98% of the paired-end  
11  
12  
13 102 genomic sequencing reads aligning to the assembly, of which, 99.97% aligned concordantly.  
14  
15 103 With respect to genic representation, 95.3% of RNA-seq-derived transcript assemblies [4] and  
16  
17  
18 104 74,119 of 74,682 (99%) pyrosequencing transcript reads from a separate study [5] aligned to  
19  
20  
21 105 the genome assembly. A total of 93.6% of conserved Embryophyta BUSCO proteins were  
22  
23 106 present in the assembly as full-length sequences with an additional 2.5% of the Embryophyta  
24  
25  
26 107 proteins fragmented [17].  
27  
28

## 29 108 **Genome annotation**

30  
31  
32

33 109 We used a novel genome annotation method to generate high quality annotation of the *C.*  
34  
35 110 *acuminata* genome. We first created a *C. acuminata* specific custom repeat library (CRL) using  
36  
37  
38 111 MITE-Hunter (v2011) [18] and RepeatModeler (v1.0.8) [19]. Protein coding genes were  
39  
40  
41 112 removed from each repeat library using ProtExcluder.pl (v1.1) [20] and combined into a single  
42  
43 113 CRL, which hard-masked 143.6 Mb (35.6%) of the assembly as repetitive sequence using  
44  
45  
46 114 RepeatMasker (v4.0.6) [21]. Cleaned root RNA-seq reads (Table S1, BioSample ID:  
47  
48 115 SAMN06229771) were aligned to the genome assembly using TopHat2 (v2.0.13) [22] in strand-  
49  
50  
51 116 specific mode with a minimum intron length of 20 bp and a maximum intron length of 20 kb;  
52  
53  
54 117 the alignments were then used to create a genome-guided transcriptome assembly using  
55  
56 118 Trinity (v2.2.0) [23]. The RNA-seq alignments were used to train AUGUSTUS (v3.1) [24] and  
57  
58  
59 119 gene predictions were generated with AUGUSTUS [25] using the hard-masked assembly. Gene  
60  
61  
62  
63  
64  
65

1  
2  
3  
4 120 model structures were refined by incorporating evidence from the genome-guided  
5  
6  
7 121 transcriptome assembly using PASA2 (v2.0.2) [26, 27]; with the parameters:  
8  
9  
10 122 MIN\_PERCENT\_ALIGNED=90, MIN\_AVG\_PER\_ID=99. After annotation comparison, models that  
11  
12 123 PASA identified as being merged and a subset of candidate camptothecin biosynthetic  
13  
14 124 pathways genes identified as mis-annotated were manually curated. The final high-confidence  
15  
16  
17 125 gene model set consists of 31,825 genes encoding 40,332 gene models. Functional annotation  
18  
19  
20 126 was assigned using a custom pipeline using WU-BLASTP [28] searches against the *Arabidopsis*  
21  
22 127 *thaliana* annotation (TAIR10; [29]) and Swiss-Prot plant proteins (downloaded on 08-17-2015),  
23  
24  
25 128 and a search against Pfam (v29) using HMMER (v3.1b2) [30]. This resulted in 34,143 gene  
26  
27  
28 129 models assigned a putative function, 2,011 annotated as conserved hypothetical, and 4,178  
29  
30 130 annotated as hypothetical.  
31  
32  
33  
34 131 *C. acuminata* is insensitive to camptothecin due to mutations within its own DNA  
35  
36 132 topoisomerase [31] and we identified two topoisomerase genes in our annotated gene set, one  
37  
38  
39 133 of which matches the published *C. acuminata* topoisomerase (99.78% identity, 100% coverage)  
40  
41 134 and includes the two mutations that confer resistance to camptothecin (Figure 2B). Further  
42  
43  
44 135 quality assessments of our annotation with 35 nuclear-encoded *C. acuminata* genes available  
45  
46  
47 136 from GenBank revealed an average identity of 99.5% with 100% coverage in our annotated  
48  
49 137 proteome while a single gene encoding 1-deoxy-D-xylulose 5-phosphate reductoisomerase  
50  
51  
52 138 (ABC86579.1) had 88.2% identity with 100% coverage that may be attributable to differences in  
53  
54 139 genotypes. One mRNA reported to encode a putative strictosidine beta-D-glucosidase  
55  
56  
57 140 (AES93119.1) was found to have a retained intron that when removed, aligned with 99.3%  
58  
59 141 identity yet reduced coverage (66%) as it was located at the end of a short scaffold. Collectively,  
60  
61  
62  
63  
64  
65

1  
2  
3  
4 142 the concordant alignment of whole genome shotgun sequence reads to the assembly, the high  
5  
6  
7 143 representation of genic regions as assessed by independent transcriptome datasets (RNA-seq  
8  
9  
10 144 and pyrosequencing) as well as the core Embryophyta BUSCO proteins, when coupled with the  
11  
12 145 high quality gene models as revealed through alignments with cloned *C. acuminata* genes  
13  
14  
15 146 indicate that we have not only generated a high quality genome assembly for *C. acuminata* but  
16  
17 147 also a robust set of annotated gene models.

### 20 148 **Orthology analysis**

21  
22  
23  
24 149 To our knowledge, *C. acuminata* is the first species within the Nyssaceae family with a genome  
25  
26  
27 150 sequence. To better understand the evolutionary relationship of *C. acuminata* with other  
28  
29  
30 151 asterids and angiosperms, we identified orthologous and paralogous groups using our  
31  
32 152 annotated *C. acuminata* proteome and the proteomes of five other key species (*Arabidopsis*  
33  
34  
35 153 *thaliana*, *Amborella trichopoda*, *Vitis vinifera*, *Oryza sativa*, and *Catharanthus roseus*) using  
36  
37 154 OrthoFinder (v0.7.1) [32] with default parameters. A total of 12,459 orthologous groups  
38  
39  
40 155 containing at least a single *C. acuminata* protein were identified with 8,521 orthologous groups  
41  
42 156 common to all six species (Figure 3; Table S2). Interestingly, *C. acuminata* contains the least  
43  
44  
45 157 number of singleton genes (7,177) among the six species, and gene ontology analysis  
46  
47  
48 158 demonstrated that these genes were highly enriched in “transport”, “response to stress”, and  
49  
50 159 “other cellular and biological processes” ( $p < 0.0001$ ,  $\chi^2$  test) while dramatically under-  
51  
52  
53 160 represented in “unknown biological processes” ( $p < 0.0001$ ,  $\chi^2$  test), suggesting these genes  
54  
55 161 may be involved in stress responses and other processes specific to *C. acuminata*.

### 58 162 **Candidate genes in the camptothecin biosynthesis pathway**



1  
2  
3  
4 163 While the full camptothecin biosynthetic pathway has yet to be resolved, geranylgeranyl  
5  
6  
7 164 diphosphate from the 2-C-methyl-D-erythritol 4-phosphate/1-deoxy-D-xylulose 5-phosphate  
8  
9  
10 165 (MEP) pathway is used to generate secologanic acid via the iridoid pathway and tryptamine  
11  
12 166 from tryptophan decarboxylase are condensed by strictosidinic acid synthase to generate  
13  
14  
15 167 strictosidinic acid [33] (Figure 4A). Based on sequence identity and orthology with validated  
16  
17 168 genes from *C. roseus*, we identified candidate orthologs for all steps in the MEP and iridoid  
18  
19  
20 169 pathway (Table 3). The downstream steps in camptothecin biosynthesis subsequent to  
21  
22 170 formation of strictosidinic acid involve a broad set of enzymes responsible for reduction and  
23  
24  
25 171 oxidation [33] and a total of 343 cytochrome P450s (60 paralogous gene clusters and 86  
26  
27  
28 172 singletons; Table S3) were identified which can serve as candidates for the later steps in  
29  
30 173 camptothecin biosynthesis.  
31  
32  
33 174 Though not absolute, physical clustering of genes involved in specialized metabolism has been  
34  
35  
36 175 observed in a number of species across a number of classes of specialized metabolites [34, 35].  
37  
38  
39 176 With an N50 scaffold size of 1,752 kbp, we observed several instances of physical clustering of  
40  
41 177 genes with homology to genes involved in monoterpene indole alkaloid biosynthesis which may  
42  
43  
44 178 produce related compounds in *C. acuminata*. Using validated genes involved in the biosynthesis  
45  
46  
47 179 of vinblastine and vincristine from *C. roseus* as queries [36] (Figure 4A, Table 3), we identified a  
48  
49 180 single *C. acuminata* scaffold (907 kbp, 86 genes; Figure 4B) that encoded genes with sequence  
50  
51  
52 181 identity to isopentenyl diphosphate isomerase II within the MEP pathway, 8-hydroxygeraniol  
53  
54 182 oxidoreductase (GOR, three complete and one partial paralogs), 7-deoxyloganic acid 7-  
55  
56  
57 183 hydroxylase (7DLH) within the iridoid pathway, and a protein with homology to *C. roseus* 16-  
58  
59 184 hydroxy-2,3-dihydro-3-hydroxytabersonine N-methyltransferase (NMT) within the alkaloid  
60  
61  
62  
63  
64  
65

1  
2  
3  
4 185 pathway suggesting that access to a high contiguity genome assembly may facilitate discovery  
5  
6  
7 186 of genes involved in specialized metabolism in *C. acuminata*.  
8  
9

### 10 187 **Tandem duplicated genes and their differential expression**

11  
12  
13  
14 188 While fast and inexpensive, one limitation of using transcriptome assemblies solely for  
15  
16 189 candidate gene discovery is the generation of chimeric transcripts if paralogs with high  
17  
18  
19 190 sequence identity are present in the transcriptome. For *C. acuminata*, it was readily apparent  
20  
21 191 during our analyses of candidate camptothecin biosynthetic pathway genes that there was  
22  
23  
24 192 extensive gene duplication, including tandem duplications (e.g., Figure 4B). Paralogous  
25  
26  
27 193 clustering of the *C. acuminata* proteome revealed 5,768 paralogous groups containing 17,957  
28  
29 194 genes. We identified tandem gene duplications in the *C. acuminata* genome based on if: 1) two  
30  
31  
32 195 or more *C. acuminata* genes were present within an orthologous/paralogous group; 2) there  
33  
34  
35 196 were no more than 10 genes in between on a single scaffold; and 3) the pairwise gene distance  
36  
37 197 was less than 100 kbp [37]. Under these criteria, a total of 3,315 genes belonging to 1,245  
38  
39  
40 198 tandem duplicated gene clusters were identified as exemplified by the clustering of four GOR  
41  
42 199 genes on a single scaffold (Figure 4B). Stringent alignment of genes and transcripts to a genome  
43  
44  
45 200 assembly can distinguish paralogs and their unique expression patterns attributable to neo-  
46  
47  
48 201 functionalization. Using RNA-seq datasets generated from a range of developmental tissues [4]  
49  
50 202 (Tables S1 and S4), expression of paralogs from tandem duplicated gene clusters were readily  
51  
52  
53 203 distinguished as shown in Figure 5 in which nine paralogs of the late embryogenesis abundant  
54  
55 204 hydroxyproline-rich glycoprotein family gene have undergone neo-functionalization at the  
56  
57  
58 205 expression level. With access to a genome assembly and a large suite of RNA-seq datasets [4]  
59  
60  
61  
62  
63  
64  
65

1  
2  
3  
4 206 and their corresponding metabolite data [38], we are now poised to identify and validate genes  
5  
6  
7 207 involved in the biosynthesis of camptothecin.  
8  
9

#### 10 208 **Uses for the *C. acuminata* genome sequence and annotation**

11  
12  
13  
14 209 Generation of a high-quality genome sequence and annotation dataset for *C. acuminata* will  
15  
16 210 facilitate discovery of genes encoding camptothecin biosynthesis as physical clustering can be  
17  
18  
19 211 combined with co-expression data to identify candidate genes, an approach that has been  
20  
21 212 extremely useful in identifying genes in specialized metabolism in a number of plant species  
22  
23  
24 213 (see [35, 36, 39]). The *C. acuminata* genome can also be used to facilitate our understanding of  
25  
26  
27 214 the mechanisms by which camptothecin production evolved independently in distinct taxa such  
28  
29 215 as *C. acuminata* (Nyssaceae) and *O. pumila* (Rubiaceae). For example, a comparative analysis of  
30  
31  
32 216 *C. acuminata* and *O. pumila* may be highly informative in not only delineating genes involved in  
33  
34  
35 217 camptothecin biosynthesis but also in revealing key evolutionary events that led to biosynthesis  
36  
37 218 of this critical natural product across a wide phylogenetic distance. As noted above,  
38  
39  
40 219 camptothecin is cytotoxic and as a consequence, derivatives of camptothecin are used as anti-  
41  
42 220 cancer drugs. Perhaps most exciting, the ability to decipher the full camptothecin biosynthetic  
43  
44  
45 221 pathway will yield molecular reagents that can be used to not only synthesize camptothecin in  
46  
47 222 heterologous systems such as yeast, but also produce less toxic analogs with novel  
48  
49  
50 223 pharmaceutical applications.  
51

#### 52 53 224 **Availability of Supporting Information**

54  
55  
56  
57 225 Raw genomic sequence reads and transcriptome reads derived from root tissues are available  
58  
59 226 in the NCBI Sequence Read Archive under project number PRJNA361128. All other RNA-seq  
60  
61  
62  
63  
64  
65

1  
2  
3  
4 227 transcriptome reads were from Bioproject PRJNA80029 [4]. The genome assembly and  
5  
6  
7 228 annotation are available in the Dryad Digital Repository under doi (to be released upon  
8  
9  
10 229 publication), through the Medicinal Plant Genomics Resource [40] via a genome browser and  
11  
12 230 search and analysis tools, and GigaDB.

13  
14  
15 231 **Note:** Reviewers can access the genome sequence and annotation using the following  
16  
17  
18 232 temporary URL: <http://datadryad.org/review?doi=doi:10.5061/dryad.nc8qr>.

19  
20 233  
21  
22  
23  
24 234 **Abbreviations**  
25  
26  
27  
28 235 2-C-methyl-D-erythritol 4-phosphate/1-deoxy-D-xylulose 5-phosphate (MEP), 7-deoxyloganic  
29  
30 236 acid 7-hydroxylase (7DLH), 8-hydroxygeraniol oxidoreductase (GOR), 16-hydroxy-2,3-dihydro-3-  
31  
32  
33 237 hydroxytabersonine N-methyltransferase (NMT), custom repeat library (CRL), National Center  
34  
35 238 for Biotechnology Information (NCBI), RNA-sequencing (RNA-seq)

### 38 39 239 **Competing Interests**

40  
41  
42 240 The authors have declared that no competing interests exists.

### 44 45 241 **Author Contributions**

46  
47  
48  
49 242 CRB oversaw the project. DZ performed the genome assembly, assisted in genome annotation  
50  
51  
52 243 and analyzed data. JH annotated the genome and analyzed data. EC, GP, and KWR constructed  
53  
54 244 libraries and analyzed data. BV analyzed data. DDP provided intellectual oversight. DZ, JH, and  
55  
56  
57 245 CRB wrote the manuscript.

1  
2  
3  
4  
5  
6  
7  
8  
9  
10  
11  
12  
13  
14  
15  
16  
17  
18  
19  
20  
21  
22  
23  
24  
25  
26  
27  
28  
29  
30  
31  
32  
33  
34  
35  
36  
37  
38  
39  
40  
41  
42  
43  
44  
45  
46  
47  
48  
49  
50  
51  
52  
53  
54  
55  
56  
57  
58  
59  
60  
61  
62  
63  
64  
65

246 **Acknowledgements**

247 Funding for this work was provided in part by a grant to CRB and DDP from the National  
248 Institute of General Medical Sciences (1RC2GM092521) and funds to CRB and DDP from  
249 Michigan State University. The funders had no role in study design, data collection and analysis,  
250 decision to publish, or preparation of the manuscript.

1  
2  
3  
4  
5  
6  
7  
8  
9  
10  
11  
12  
13  
14  
15  
16  
17  
18  
19  
20  
21  
22  
23  
24  
25  
26  
27  
28  
29  
30  
31  
32  
33  
34  
35  
36  
37  
38  
39  
40  
41  
42  
43  
44  
45  
46  
47  
48  
49  
50  
51  
52  
53  
54  
55  
56  
57  
58  
59  
60  
61  
62  
63  
64  
65

251 **Figure Legends**

252 **Figure 1. *Camptotheca acuminata* Decne, the Chinese Happy Tree, is a member in the**  
253 **Nyssaceae family that produces the anticancer compound camptothecin.**

254 **Figure 2. Genome aspects of *Camptotheca acuminata*. (A) Structure of camptothecin. (B) Key**  
255 **amino acid mutations (red rectangles) in DNA topoisomerase I in camptothecin-producing**  
256 **and non-producing species and their phylogenetic relationship.**

257 **Figure 3. Venn diagram showing orthologous and paralogous groups between *Camptotheca***  
258 ***acuminata*, *Amborella trichopoda*, *Oryza sativa*, *Arabidopsis thaliana*, *Vitis vinifera*, and**  
259 ***Catharanthus roseus*.**

260 **Figure 4. Key portions of the proposed camptothecin biosynthetic pathway and an example of**  
261 **physical clustering of candidate genes in *Camptotheca acuminata*. (A) The methylerythritol**  
262 **phosphate (MEP) pathway (green), iridoid pathway (blue), and condensation of secologanic**  
263 **acid with tryptamine via strictosidinic acid synthase (STRAS) to form strictosidinic acid prior**  
264 **to downstream dehydration, reduction, and oxidation steps yielding camptothecin. DXS, 1-**  
265 **deoxy-D-xylulose 5-phosphate synthase 2; DXR, 1-deoxy-D-xylulose-5-phosphate**  
266 **reductoisomerase; CMS, 4-diphosphocytidyl-methylerythritol 2-phosphate synthase; CMK, 4-**  
267 **diphosphocytidyl-2-C-methyl-D-erythritol kinase; MCS, 2C-methyl-D-erythritol 2,4-**  
268 **cyclodiphosphate synthase; HDS, GCPE protein; HDR, 1-hydroxy-2-methyl-butenyl 4-**  
269 **diphosphate reductase; IPI, plastid isopentenyl pyrophosphate, dimethylallyl pyrophosphate**  
270 **isomerase; GPPS, geranyl pyrophosphate synthase; GES, plastid geraniol synthase; G8H,**  
271 **geraniol 8-hydroxylase; GOR, 8-hydroxygeraniol oxidoreductase; CYC1, iridoid cyclase 1; 7-DLS,**

1  
2  
3  
4  
5  
6  
7  
8  
9  
10  
11  
12  
13  
14  
15  
16  
17  
18  
19  
20  
21  
22  
23  
24  
25  
26  
27  
28  
29  
30  
31  
32  
33  
34  
35  
36  
37  
38  
39  
40  
41  
42  
43  
44  
45  
46  
47  
48  
49  
50  
51  
52  
53  
54  
55  
56  
57  
58  
59  
60  
61  
62  
63  
64  
65

272 7-deoxyloganetic acid synthase; 7-DLGT, 7-deoxyloganetic acid glucosyltransferase; 7-DLH, 7-  
273 deoxyloganic acid hydroxylase; SLAS, secologanic acid synthase; TDC, tryptophan decarboxylase.

274 **(B) Physical clustering of homologs of genes involved in the methylerythritol phosphate,  
275 iridoid, and alkaloid biosynthetic pathways of *Catharanthus roseus* on scaffold 151 of *C.***

276 ***acuminata*.** GOR: 8-hydroxygeraniol oxidoreductase; NMT: 16-hydroxy-2,3-dihydro-3-  
277 hydroxytabersonine N-methyltransferase; 7DLH: 7-deoxyloganic acid 7-hydroxylase; IPP2:  
278 isopentenyl diphosphate isomerase II. Gene IDs are below the arrows.

279 **Figure 5. Expression patterns of a tandem gene cluster encoding late embryogenesis  
280 abundant hydroxyproline-rich glycoproteins across various *Camptotheca acuminata* tissues.**

281

282 **Table 1. Input libraries and sequences for *de novo* assembly of the *Camptotheca acuminata***  
 283 **genome.**

| BioProject ID     | BioSample ID | Fragment size (bp) | No. of cleaned read pairs | Use                  |
|-------------------|--------------|--------------------|---------------------------|----------------------|
| <b>Paired end</b> |              |                    |                           |                      |
| PRJNA361128       | SAMN06220985 | 180                | 96,955,546                | ALLPATHS-LG assembly |
| PRJNA361128       | SAMN06220986 | 268                | 89,381,055                | ALLPATHS-LG assembly |
| PRJNA361128       | SAMN06220987 | 352                | 61,207,691                | GapCloser            |
| PRJNA361128       | SAMN06220988 | 429                | 50,688,562                | GapCloser            |
| PRJNA361128       | SAMN06220989 | 585                | 21,856,610                | GapCloser            |
| PRJNA361128       | SAMN06220990 | 609                | 22,217,954                | GapCloser            |
| <b>Mate pair</b>  |              |                    |                           |                      |
| PRJNA361128       | SAMN06220991 | 8,111              | 9,923,643                 | ALLPATHS-LG assembly |
| PRJNA361128       | SAMN06220992 | 7,911              | 7,652,519                 | ALLPATHS-LG assembly |
| PRJNA361128       | SAMN06220993 | 1,377              | 12,800,554                | ALLPATHS-LG assembly |
| PRJNA361128       | SAMN06220994 | 3,179              | 13,138,503                | ALLPATHS-LG assembly |
| PRJNA361128       | SAMN06220995 | 8,879              | 13,599,241                | ALLPATHS-LG assembly |

All libraries were sequenced in paired end mode generating 150 nt reads.



1  
2  
3  
4  
5  
6  
7  
8  
9  
10  
11  
12  
13  
14  
15  
16  
17  
18  
19  
20  
21  
22  
23  
24  
25  
26  
27  
28  
29  
30  
31  
32  
33  
34  
35  
36  
37  
38  
39  
40  
41  
42  
43  
44  
45  
46  
47  
48  
49  
50  
51  
52  
53  
54  
55  
56  
57  
58  
59  
60  
61  
62  
63  
64  
65

285 **Table 2. Metrics of the final assembly of *Camptotheca acuminata* genome.**

| Metric                       | Value       |
|------------------------------|-------------|
| Total scaffold length (bp)   | 403,174,860 |
| Total no. of scaffolds (bp)  | 1,394       |
| Maximum scaffold length (bp) | 8,423,530   |
| Minimum scaffold length (bp) | 1,002       |
| N50 scaffold size (bp)       | 1,751,747   |
| N50 contig size (bp)         | 107,594     |
| No. Ns                       | 3,772,191   |
| No. gaps                     | 3,825       |

286

287 **Table 3. Candidate camptothecin biosynthetic pathway genes in *Camptotheca acuminata*.**

| Description                                              | Abbreviation | Species                      | Protein    | Camptotheca Gene ID | % coverage | % identity |
|----------------------------------------------------------|--------------|------------------------------|------------|---------------------|------------|------------|
| <b>Mevaolonate</b>                                       |              |                              |            |                     |            |            |
| isopentenyl diphosphate isomerase I                      | IPP1         | <i>Camptotheca acuminata</i> | AAB94132.1 | Cac_g008847.t1      | 100        | 99.15      |
| isopentenyl diphosphate isomerase II                     | IPP2         | <i>Camptotheca acuminata</i> | AAB94133.1 | Cac_g027591.t1      | 100        | 100.00     |
| 3-hydroxy-3-methylglutaryl coenzyme A reductase          | HMGCR        | <i>Camptotheca acuminata</i> | AAB69726.1 | Cac_g011539.t1      | 100        | 99.48      |
| 3-hydroxy-3-methylglutaryl coenzyme A reductase          | HMGCR        | <i>Camptotheca acuminata</i> | AAB69727.1 | Cac_g003668.t1      | 100        | 98.64      |
| 3-hydroxy-3-methylglutaryl-coenzyme A reductase          | HMGCR        | <i>Camptotheca acuminata</i> | AAA33040   | Cac_g033987.t1      | 100        | 99.83      |
| 3-hydroxy-3-methylglutaryl-CoA synthase                  | HMGCS        | <i>Camptotheca acuminata</i> | ACD87446.1 | Cac_g028532.t1      | 100        | 95.54      |
| <b>MEP</b>                                               |              |                              |            |                     |            |            |
| 1-deoxy-D-xylulose 5-phosphate synthase 2                | DXS          | <i>Catharanthus roseus</i>   | ABI35993.1 | Cac_g024944.t1      | 98         | 77.60      |
| 1-deoxy-D-xylulose-5-phosphate reductoisomerase          | DXR          | <i>Catharanthus roseus</i>   | AAF65154.1 | Cac_g016318.t1      | 100        | 88.82      |
| 1-deoxy-D-xylulose 5-phosphate reductoisomerase          | DXR          | <i>Camptotheca acuminata</i> | ABC86579.1 | Cac_g016318.t1      | 100        | 88.16      |
| 4-diphosphocytidyl-methylerythritol 2-phosphate synthase | CMS          | <i>Catharanthus roseus</i>   | ACI16377.1 | Cac_g018722.t1      | 88         | 77.82      |
| 4-diphosphocytidyl-2-C-methyl-D-erythritol kinase        | CMK          | <i>Catharanthus roseus</i>   | ABI35992.1 | Cac_g021688.t1      | 99         | 76.17      |
| 2C-methyl-D-erythritol 2,4-cyclodiphosphate synthase     | MCS          | <i>Catharanthus roseus</i>   | AAF65155.1 | Cac_g008169.t1      | 100        | 73.77      |
| GCPE protein                                             | HDS          | <i>Catharanthus roseus</i>   | AAO24774.1 | Cac_g022763.t1      | 100        | 88.65      |
| 1-hydroxy-2-methyl-butenyl 4-diphosphate reductase       | HDR          | <i>Catharanthus roseus</i>   | ABI30631.1 | Cac_g014659.t1      | 100        | 83.77      |
| plastid isopentenyl pyrophosphate:dimethylallyl          | IPI          | <i>Catharanthus roseus</i>   | ABW98669.1 | Cac_g008847.t1      | 76         | 91.06      |

14  
15  
16  
17  
18  
19  
20  
21  
22  
23  
24  
25  
26  
27  
28  
29  
30  
31  
32  
33  
34  
35  
36  
37  
38  
39  
40  
41  
42  
43  
44  
45  
46  
47  
48  
49  
50  
51  
52  
53  
54  
55  
56  
57  
58  
59  
60  
61  
62  
63  
64  
65

|                                           |       |                              |            |                |     |        |  |
|-------------------------------------------|-------|------------------------------|------------|----------------|-----|--------|--|
| pyrophosphate isomerase                   |       |                              |            |                |     |        |  |
| plastid isopentenyl diphosphate isomerase | IPI   | <i>Camptotheca acuminata</i> | ABI13583.1 | Cac_g027591.t1 | 100 | 97.41  |  |
| geranyl pyrophosphate synthase            | GPPS  | <i>Catharanthus roseus</i>   | ACC77966.1 | Cac_g026508.t1 | 51  | 76.50  |  |
| 10-hydroxygeraniol oxidoreductase         | 10HGO | <i>Camptotheca acuminata</i> | AAQ20892.1 | Cac_g005530.t1 | 100 | 100.00 |  |
| <b>Iridoid</b>                            |       |                              |            |                |     |        |  |
| geraniol synthase                         | GES   | <i>Camptotheca acuminata</i> | ALL56347.1 | Cac_g014037.t1 | 100 | 100.00 |  |
| geraniol 8-hydroxylase                    | G8H   | <i>Catharanthus roseus</i>   | CAC80883.1 | Cac_g017987.t1 | 95  | 76.71  |  |
| 8-hydroxygeraniol oxidoreductase          | GOR   | <i>Catharanthus roseus</i>   | AHK60836.1 | Cac_g027560.t1 | 100 | 71.69  |  |
| iridoid synthase                          | ISY   | <i>Catharanthus roseus</i>   | AFW98981.1 | Cac_g006027.t1 | 100 | 65.65  |  |
| iridoid synthase                          | CYC1  | <i>Camptotheca acuminata</i> | AON76722.1 | Cac_g006027.t1 | 100 | 100.00 |  |
| iridoid oxidase                           | IO    | <i>Catharanthus roseus</i>   | AHK60833.1 | Cac_g032709.t1 | 97  | 78.44  |  |
| UDP-glucose iridoid glucosyltransferase   | 7DLGT | <i>Catharanthus roseus</i>   | BAO01109.1 | Cac_g008744.t1 | 100 | 77.11  |  |
| 7-deoxyloganic acid 7-hydroxylase         | 7DLH  | <i>Catharanthus roseus</i>   | AGX93062.1 | Cac_g012663.t1 | 96  | 69.58  |  |
| loganic acid methyltransferase            | LAMT  | <i>Catharanthus roseus</i>   | ABW38009.1 | Cac_g005179.t1 | 95  | 53.91  |  |
| secologanin synthase                      | SLS   | <i>Catharanthus roseus</i>   | AAA33106.1 | Cac_g012666.t1 | 99  | 64.94  |  |
| secologanin synthase                      | SLS   | <i>Ophiorrhiza pumila</i>    | BAP90521.1 | Cac_g012666.t1 | 99  | 66.73  |  |
| <b>Alkaloid</b>                           |       |                              |            |                |     |        |  |
| tryptophan decarboxylase                  | TDC1  | <i>Camptotheca acuminata</i> | AON76721   | Cac_g018974.t1 | 100 | 100.00 |  |

Note: Only the top hit from the BLAST search is presented.

1  
2  
3  
4 288 **References**  
5  
6  
7

- 8 289 1. Angiosperm\_Phylogeny\_Group\_III. An update of the Angiosperm Phylogeny Group classification  
9 290 for the orders and families of flowering plants: APG III. Botanical Journal of the Linnean Society.  
10 291 2009;161:105-21.  
11 292 2. Lorence A, Nessler, C.L. Molecules of Interest: Camptothecin, over four decades of surprising  
12 293 findings. Phytochemistry. 2004; 65:2735–49.  
13 294 3. Organization WH: 19th WHO Model List of Essential Medicines.  
14 295 [http://www.who.int/medicines/publications/essentialmedicines/EML2015\\_8-May-15.pdf](http://www.who.int/medicines/publications/essentialmedicines/EML2015_8-May-15.pdf).  
15 296 Accessed 26 March 2017.  
16 297 4. Gongora-Castillo E, Childs KL, Fedewa G, Hamilton JP, Liscombe DK, Magallanes-Lundback M, et  
17 298 al. Development of transcriptomic resources for interrogating the biosynthesis of monoterpene  
18 299 indole alkaloids in medicinal plant species. PLoS One. 2012;7 12:e52506.  
19 300 doi:10.1371/journal.pone.0052506.  
20 301 5. Sun Y, Luo H, Li Y, Sun C, Song J, Niu Y, et al. Pyrosequencing of the *Camptotheca acuminata*  
21 302 transcriptome reveals putative genes involved in camptothecin biosynthesis and transport. BMC  
22 303 Genomics. 2011;12:533. doi:10.1186/1471-2164-12-533.  
23 304 6. Yamazaki M, Mochida K, Asano T, Nakabayashi R, Chiba M, Udomson N, et al. Coupling deep  
24 305 transcriptome analysis with untargeted metabolic profiling in *Ophiorrhiza pumila* to further the  
25 306 understanding of the biosynthesis of the anti-cancer alkaloid camptothecin and anthraquinones.  
26 307 Plant Cell Physiol. 2013;54 5:686-96. doi:10.1093/pcp/pct040.  
27 308 7. Martin M. Cutadapt removes adapter sequences from high-throughput sequencing reads.  
28 309 EMBnetjournal. 2011;17 1 doi:<http://dx.doi.org/10.14806/ej.17.1.200>.  
29 310 8. Haas BJ, Papanicolaou A, Yassour M, Grabherr M, Blood PD, Bowden J, et al. De novo transcript  
30 311 sequence reconstruction from RNA-seq using the Trinity platform for reference generation and  
31 312 analysis. Nat Protoc. 2013;8 8:1494-512. doi:10.1038/nprot.2013.084.  
32 313 9. Altschul SF, Madden TL, Schaffer AA, Zhang J, Zhang Z, Miller W, et al. Gapped BLAST and PSI-  
33 314 BLAST: a new generation of protein database search programs. Nucleic Acids Res. 1997;25  
34 315 17:3389-402.  
35 316 10. Camacho C, Coulouris G, Avagyan V, Ma N, Papadopoulos J, Bealer K, et al. BLAST+: architecture  
36 317 and applications. BMC Bioinformatics. 2009;10:421. doi:10.1186/1471-2105-10-421.  
37 318 11. FastQC. <http://www.bioinformatics.babraham.ac.uk/projects/fastqc/>. Accessed 26 March 2017.  
38 319 12. Saghai-Marooif MA, Soliman KM, Jorgensen RA and Allard RW. Ribosomal DNA Spacer-Length  
39 320 Polymorphisms in Barley - Mendelian Inheritance, Chromosomal Location, and Population-  
40 321 Dynamics. PRoc Natl Acad USA. 1984;81 24:8014-8. doi:Doi 10.1073/Pnas.81.24.8014.  
41 322 13. Hardigan MA, Crisovan E, Hamilton JP, Kim J, Laimbeer P, Leisner CP, et al. Genome Reduction  
42 323 Uncovers a Large Dispensable Genome and Adaptive Role for Copy Number Variation in  
43 324 Asexually Propagated *Solanum tuberosum*. Plant Cell. 2016;28 2:388-405.  
44 325 doi:10.1105/tpc.15.00538.  
45 326 14. Leggett RM, Clavijo BJ, Clissold L, Clark MD and Caccamo M. NextClip: an analysis and read  
46 327 preparation tool for Nextera Long Mate Pair libraries. Bioinformatics. 2014;30 4:566-8.  
47 328 doi:10.1093/bioinformatics/btt702.  
48 329 15. Gnerre S, Maccallum I, Przybylski D, Ribeiro FJ, Burton JN, Walker BJ, et al. High-quality draft  
49 330 assemblies of mammalian genomes from massively parallel sequence data. Proc Natl Acad Sci U  
50 331 S A. 2011;108 4:1513-8. doi:1017351108.  
51  
52  
53  
54  
55  
56  
57  
58  
59  
60  
61  
62  
63  
64  
65

- 1  
2  
3  
4 332 16. Luo R, Liu B, Xie Y, Li Z, Huang W, Yuan J, et al. SOAPdenovo2: an empirically improved memory-  
5 333 efficient short-read de novo assembler. *Gigascience*. 2012;1 1:18. doi:10.1186/2047-217X-1-18.  
6 334 17. Simao FA, Waterhouse RM, Ioannidis P, Kriventseva EV and Zdobnov EM. BUSCO: assessing  
7 genome assembly and annotation completeness with single-copy orthologs. *Bioinformatics*.  
8 335 2015;31 19:3210-2. doi:10.1093/bioinformatics/btv351.  
9 336 18. Han Y and Wessler SR. MITE-Hunter: a program for discovering miniature inverted-repeat  
10 337 transposable elements from genomic sequences. *Nucleic Acids Res*. 2010;38 22:e199.  
11 338 doi:10.1093/nar/gkq862.  
12 339 19. Repeat Molder. <http://www.repeatmasker.org/>. Accessed 26 March 2017.  
13 340 20. Campbell MS, Law M, Holt C, Stein JC, Moghe GD, Hufnagel DE, et al. MAKER-P: a tool kit for the  
14 341 rapid creation, management, and quality control of plant genome annotations. *Plant Physiol*.  
15 342 2014;164 2:513-24. doi:10.1104/pp.113.230144.  
16 343 21. RepeatMasker. <http://www.repeatmasker.org/>. Accessed 26 March 2017.  
17 344 22. Kim D, Pertea G, Trapnell C, Pimentel H, Kelley R and Salzberg SL. TopHat2: accurate alignment  
18 345 of transcriptomes in the presence of insertions, deletions and gene fusions. *Genome Biol*.  
19 346 2013;14 4:R36. doi:10.1186/gb-2013-14-4-r36.  
20 347 23. Grabherr MG, Haas BJ, Yassour M, Levin JZ, Thompson DA, Amit I, et al. Full-length  
21 348 transcriptome assembly from RNA-Seq data without a reference genome. *Nature Biotechnology*.  
22 349 2011;29 7:644-52. doi:10.1038/nbt.1883.  
23 350 24. Stanke M, Schoffmann O, Morgenstern B and Waack S. Gene prediction in eukaryotes with a  
24 351 generalized hidden Markov model that uses hints from external sources. *BMC Bioinformatics*.  
25 352 2006;7:62.  
26 353 25. Stanke M and Morgenstern B. AUGUSTUS: a web server for gene prediction in eukaryotes that  
27 354 allows user-defined constraints. *Nucleic Acids Res*. 2005;33 Web Server issue:W465-7.  
28 355 doi:10.1093/nar/gki458.  
29 356 26. PASA2. <http://pasapipeline.github.io/>. Accessed 26 March 2017.  
30 357 27. Haas BJ, Delcher AL, Mount SM, Wortman JR, Smith RK, Jr., Hannick LI, et al. Improving the  
31 358 Arabidopsis genome annotation using maximal transcript alignment assemblies. *Nucleic Acids*  
32 359 *Res*. 2003;31 19:5654-66.  
33 360 28. Altschul SF and Gish W. Local alignment statistics. *Methods Enzymol*. 1996;266:460-80.  
34 361 29. The Arabidopsis Information Resource. Arabidopsis.org. Accessed 26 March 2017.  
35 362 30. Eddy SR. Accelerated Profile HMM Searches. *PLoS Comput Biol*. 2011;7 10:e1002195.  
36 363 doi:10.1371/journal.pcbi.1002195.  
37 364 31. Sirikantaramas S, Yamazaki M and Saito K. Mutations in topoisomerase I as a self-resistance  
38 365 mechanism coevolved with the production of the anticancer alkaloid camptothecin in plants.  
39 366 *Proc Natl Acad Sci U S A*. 2008;105 18:6782-6. doi:0801038105.  
40 367 32. Emms DM and Kelly S. OrthoFinder: solving fundamental biases in whole genome comparisons  
41 368 dramatically improves orthogroup inference accuracy. *Genome Biol*. 2015;16:157.  
42 369 doi:10.1186/s13059-015-0721-2.  
43 370 33. Sadre R, Magallanes-Lundback M, Pradhan S, Salim V, Mesberg A, Jones AD, et al. Metabolite  
44 371 Diversity in Alkaloid Biosynthesis: A Multilane (Diastereomer) Highway for Camptothecin  
45 372 Synthesis in *Camptotheca acuminata*. *Plant Cell*. 2016;28 8:1926-44. doi:10.1105/tpc.16.00193.  
46 373 34. DellaPenna D and O'Connor SE. Plant science. Plant gene clusters and opiates. *Science*. 2012;336  
47 374 6089:1648-9. doi:10.1126/science.1225473.  
48 375 35. Nutzmans HW and Osbourn A. Gene clustering in plant specialized metabolism. *Curr Opin*  
49 376 *Biotechnol*. 2014;26:91-9. doi:10.1016/j.copbio.2013.10.009.  
50 377

1  
2  
3  
4  
5  
6  
7  
8  
9  
10  
11  
12  
13  
14  
15  
16  
17  
18  
19  
20  
21  
22  
23  
24  
25  
26  
27  
28  
29  
30  
31  
32  
33  
34  
35  
36  
37  
38  
39  
40  
41  
42  
43  
44  
45  
46  
47  
48  
49  
50  
51  
52  
53  
54  
55  
56  
57  
58  
59  
60  
61  
62  
63  
64  
65

378 36. Kellner F, Kim J, Clavijo BJ, Hamilton JP, Childs KL, Vaillancourt B, et al. Genome-guided  
379 investigation of plant natural product biosynthesis. *Plant J.* 2015;82 4:680-92.  
380 doi:10.1111/tpj.12827.

381 37. Hanada K, Zou C, Lehti-Shiu MD, Shinozaki K and Shiu SH. Importance of lineage-specific  
382 expansion of plant tandem duplicates in the adaptive response to environmental stimuli. *Plant*  
383 *Physiol.* 2008;148 2:993-1003.

384 38. Wurtele ES, Chappell J, Jones AD, Celiz MD, Ransom N, Hur M, et al. Medicinal plants: a public  
385 resource for metabolomics and hypothesis development. *Metabolites.* 2012;2 4:1031-59.  
386 doi:10.3390/metabo2041031.

387 39. Itkin M, Heinig U, Tzfadia O, Bhide AJ, Shinde B, Cardenas PD, et al. Biosynthesis of  
388 antinutritional alkaloids in solanaceous crops is mediated by clustered genes. *Science.* 2013;341  
389 6142:175-9. doi:10.1126/science.1240230.

390 40. The Medicinal Plant Genomics Resource. <http://medicinalplantgenomics.msu.edu/>. Accessed 26  
391 March 2017.

392  
393

1  
2  
3  
4  
5  
6  
7  
8  
9  
10  
11  
12  
13  
14  
15  
16  
17  
18  
19  
20  
21  
22  
23  
24  
25  
26  
27  
28  
29  
30  
31  
32  
33  
34  
35  
36  
37  
38  
39  
40  
41  
42  
43  
44  
45  
46  
47  
48  
49  
50  
51  
52  
53  
54  
55  
56  
57  
58  
59  
60  
61  
62  
63  
64  
65

394 **Additional files**

395 **Supplemental tables:**

396 **Table S1. RNA-sequencing libraries used in this study.**

| BioProject ID | BioSample ID | Tissue         | No. cleaned |                 |
|---------------|--------------|----------------|-------------|-----------------|
|               |              |                | reads       | Estimated bases |
| PRJNA80029    | SAMN00255206 | mature leaf    | 90,862,580  | 5,451,754,800   |
| PRJNA80029    | SAMN00255207 | immature bark  | 84,537,958  | 5,072,277,480   |
| PRJNA80029    | SAMN00255208 | root           | 88,940,668  | 5,336,440,080   |
| PRJNA80029    | SAMN00255215 | young flower   | 71,435,806  | 4,286,148,360   |
| PRJNA80029    | SAMN00255216 | immature fruit | 84,250,338  | 5,055,020,280   |
| PRJNA80029    | SAMN00255217 | mature fruit   | 47,811,342  | 2,868,680,520   |
| PRJNA80029    | SAMN00255222 | cotyledons     | 74,037,722  | 4,442,263,320   |
| PRJNA80029    | SAMN00255223 | upper stem     | 76,105,786  | 4,566,347,160   |
| PRJNA80029    | SAMN00255224 | lower stem     | 72,680,940  | 4,360,856,400   |
| PRJNA361128   | SAMN06229771 | root           | 55,435,804  | 7,224,198,331   |
| Total         |              |                | 771,909,254 | 49,309,244,481  |

397  
398 **Table S2. Orthologous groups of genes from *Camptotheca acuminata* and five other plant**  
399 **species.**

400 This is available as a separate XLS file

401

1  
2  
3  
4  
5  
6  
7  
8  
9  
10  
11  
12  
13  
14  
15  
16  
17  
18  
19  
20  
21  
22  
23  
24  
25  
26  
27  
28  
29  
30  
31  
32  
33  
34  
35  
36  
37  
38  
39  
40  
41  
42  
43  
44  
45  
46  
47  
48  
49  
50  
51  
52  
53  
54  
55  
56  
57  
58  
59  
60  
61  
62  
63  
64  
65

402 **Table S3. P450 paralogous genes in *Camptotheca acuminata*.**

403 This is available as a separate XLS file

404 **Table S4. Expression abundance matrix (fragments per kbp exon model per million mapped  
reads) from different tissues of *Camptotheca acuminata*.**

406 This is available as a separate XLS file

407



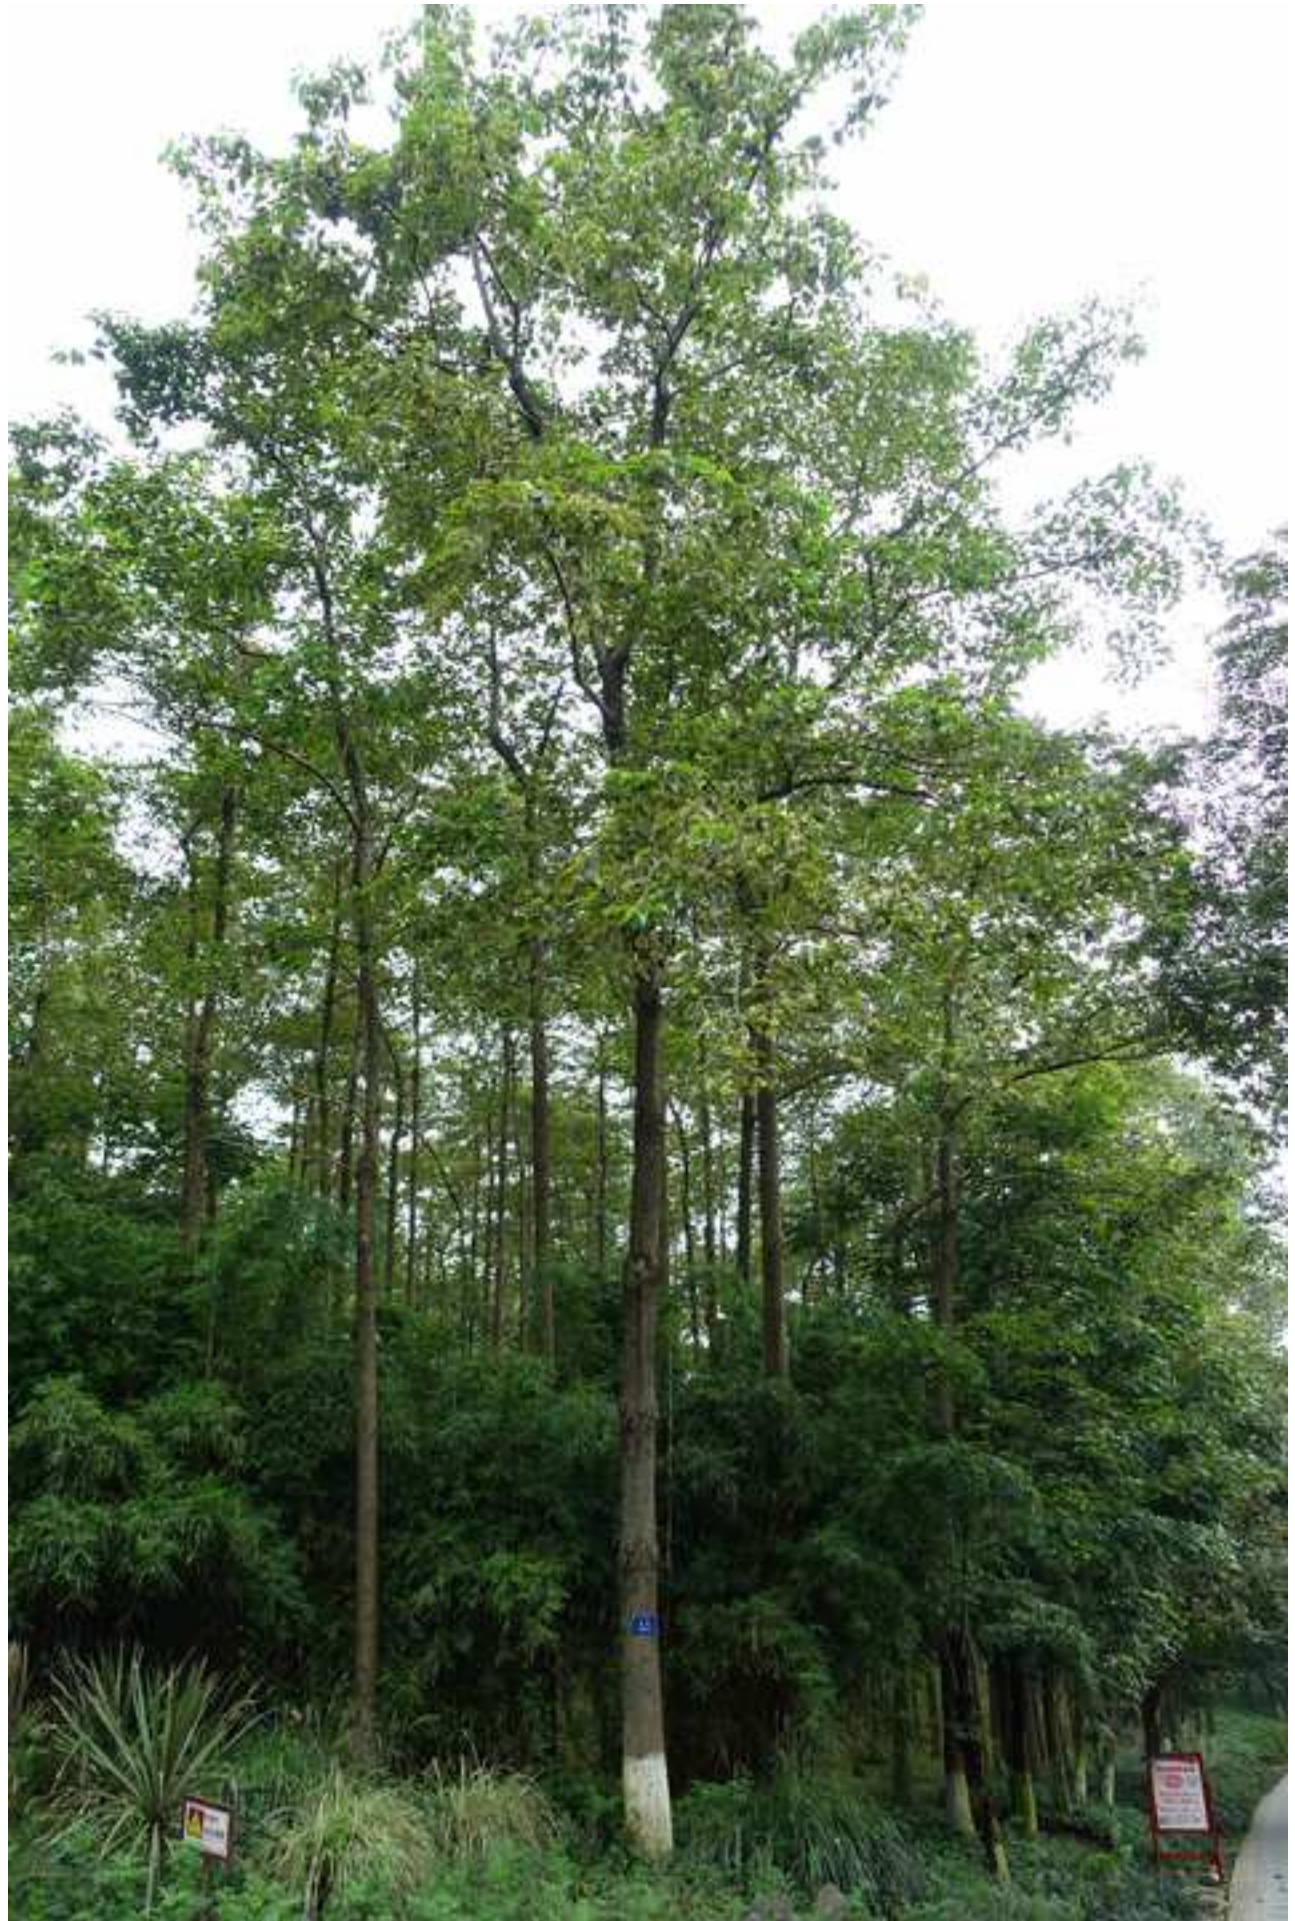

Figure 2

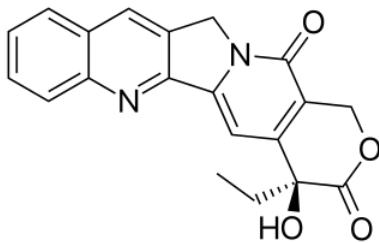

B

|                                   |                                                                                                                                                                                                                                                                                                                              |
|-----------------------------------|------------------------------------------------------------------------------------------------------------------------------------------------------------------------------------------------------------------------------------------------------------------------------------------------------------------------------|
| Homo sapiens AAA61207             | <b>F</b> RG <b>R</b> GN <b>H</b> PK <b>M</b> GM <b>L</b> KRR <b>I</b> MP <b>E</b> DI <b>I</b> NC <b>S</b> DK <b>A</b> K <b>V</b> SP <b>P</b> P-G <b>H</b> K <b>W</b> KE <b>V</b> R <b>H</b> DN <b>K</b> V <b>T</b> W <b>L</b> SV <b>T</b> EN <b>I</b> Q <b>S</b> -S 423                                                      |
| Camptotheca acuminata BAG31376    | <b>F</b> RG <b>R</b> GE <b>H</b> PK <b>M</b> GM <b>L</b> K <b>K</b> C <b>I</b> R <b>F</b> SD <b>I</b> T <b>I</b> N <b>I</b> G <b>K</b> DA <b>P</b> I <b>E</b> CP <b>I</b> PG <b>S</b> W <b>K</b> E <b>I</b> R <b>H</b> DN <b>V</b> T <b>L</b> A <b>F</b> W <b>N</b> DP <b>I</b> K <b>P</b> RE 556                            |
| Camptotheca acuminata Cac_g012488 | <b>F</b> RG <b>R</b> GE <b>H</b> PK <b>M</b> GM <b>L</b> K <b>K</b> C <b>I</b> R <b>F</b> SD <b>I</b> T <b>I</b> N <b>I</b> G <b>K</b> DA <b>P</b> I <b>E</b> CP <b>I</b> PG <b>S</b> W <b>K</b> E <b>I</b> R <b>H</b> DN <b>V</b> T <b>L</b> A <b>F</b> W <b>N</b> DP <b>I</b> K <b>P</b> RE 555                            |
| Camptotheca acuminata Cac_g021767 | <b>F</b> RG <b>R</b> GE <b>H</b> PK <b>M</b> GM <b>L</b> K <b>L</b> I <b>R</b> SP <b>D</b> I <b>T</b> I <b>N</b> I <b>G</b> K <b>D</b> A <b>P</b> I <b>E</b> CP <b>I</b> PG <b>S</b> W <b>K</b> E <b>I</b> R <b>H</b> DN <b>V</b> T <b>L</b> A <b>F</b> W <b>N</b> DP <b>I</b> N <b>P</b> RE 560                             |
| Ophiorrhiza pumila BAG31373       | <b>F</b> RG <b>R</b> GE <b>H</b> PK <b>V</b> GM <b>L</b> K <b>K</b> R <b>I</b> R <b>P</b> RD <b>I</b> T <b>I</b> N <b>I</b> G <b>K</b> DA <b>P</b> I <b>E</b> CP <b>I</b> PG <b>R</b> W <b>K</b> E <b>V</b> R <b>N</b> DN <b>V</b> T <b>L</b> A <b>Y</b> W <b>N</b> DP <b>V</b> N <b>L</b> KE 587                            |
| Ophiorrhiza liukuensis BAG31374   | <b>F</b> RG <b>R</b> GE <b>H</b> PK <b>M</b> GM <b>L</b> K <b>K</b> R <b>I</b> R <b>P</b> RD <b>I</b> T <b>I</b> N <b>I</b> G <b>K</b> DA <b>P</b> I <b>E</b> CP <b>I</b> PG <b>R</b> W <b>K</b> E <b>V</b> R <b>N</b> DN <b>V</b> T <b>L</b> A <b>F</b> W <b>N</b> DP <b>I</b> N <b>Q</b> KE 587                            |
| Ophiorrhiza japonica BAG31375     | <b>F</b> RG <b>R</b> GE <b>H</b> PK <b>M</b> GM <b>L</b> K <b>K</b> R <b>I</b> R <b>P</b> RD <b>I</b> T <b>I</b> N <b>I</b> G <b>K</b> DA <b>P</b> I <b>E</b> CP <b>I</b> PG <b>R</b> W <b>K</b> E <b>V</b> R <b>N</b> DN <b>V</b> T <b>L</b> A <b>F</b> W <b>I</b> DP <b>I</b> N <b>Q</b> KE 588                            |
| Catharanthus roseus BAG31377      | <b>F</b> RG <b>R</b> GE <b>H</b> PK <b>M</b> GM <b>L</b> K <b>K</b> R <b>I</b> R <b>P</b> CD <b>I</b> T <b>I</b> N <b>I</b> G <b>K</b> DA <b>P</b> I <b>E</b> CP <b>V</b> PG <b>R</b> W <b>K</b> E <b>V</b> R <b>H</b> DN <b>V</b> T <b>L</b> A <b>F</b> W <b>N</b> DP <b>I</b> N <b>P</b> KE 570                            |
| Arabidopsis thaliana NP_200341    | <b>F</b> RG <b>R</b> GE <b>H</b> PK <b>M</b> GM <b>L</b> K <b>K</b> R <b>I</b> HP <b>E</b> IT <b>L</b> N <b>I</b> G <b>K</b> DA <b>P</b> I <b>E</b> CP <b>I</b> AG <b>R</b> W <b>K</b> E <b>V</b> R <b>H</b> DN <b>V</b> T <b>L</b> A <b>F</b> W <b>A</b> DP <b>I</b> N <b>P</b> KE 575                                      |
| Saccharomyces cerevisiae AAA35162 | <b>F</b> X <b>G</b> R <b>G</b> A <b>H</b> P <b>T</b> G <b>K</b> L <b>K</b> R <b>R</b> V <b>N</b> P <b>E</b> D <b>I</b> V <b>L</b> N <b>L</b> S <b>K</b> D <b>A</b> P <b>V</b> P <b>A</b> P <b>E</b> -G <b>H</b> K <b>W</b> GE <b>I</b> R <b>H</b> DN <b>V</b> Q <b>L</b> A <b>M</b> W <b>R</b> EN <b>F</b> N <b>S</b> -S 355 |

Direct/indirect camptothecin binding

|                                   |                                                                                                                                                                                                                                                                                       |
|-----------------------------------|---------------------------------------------------------------------------------------------------------------------------------------------------------------------------------------------------------------------------------------------------------------------------------------|
| Homo sapiens AAA61207             | <b>E</b> SK <b>K</b> K <b>A</b> V <b>Q</b> R <b>L</b> E <b>E</b> Q <b>L</b> M <b>K</b> L <b>E</b> V <b>Q</b> A <b>T</b> D <b>R</b> E <b>N</b> K <b>Q</b> I <b>A</b> L <b>G</b> T <b>S</b> K <b>I</b> N <b>V</b> L <b>D</b> P <b>R</b> I <b>T</b> V <b>A</b> W <b>C</b> K 734          |
| Camptotheca acuminata BAG31376    | <b>E</b> AL <b>E</b> RK <b>I</b> Q <b>T</b> NA <b>K</b> I <b>E</b> K <b>M</b> ER <b>D</b> K <b>E</b> T <b>K</b> E <b>G</b> L <b>K</b> T <b>I</b> A <b>L</b> G <b>T</b> S <b>K</b> I <b>S</b> V <b>L</b> D <b>P</b> R <b>I</b> T <b>V</b> A <b>W</b> C <b>K</b> 864                    |
| Camptotheca acuminata Cac_g012488 | <b>E</b> AL <b>E</b> RK <b>I</b> Q <b>T</b> NA <b>K</b> I <b>E</b> K <b>M</b> ER <b>D</b> K <b>E</b> T <b>K</b> E <b>G</b> L <b>K</b> T <b>I</b> A <b>L</b> G <b>T</b> S <b>K</b> I <b>S</b> V <b>L</b> D <b>P</b> R <b>I</b> T <b>V</b> A <b>W</b> C <b>K</b> 863                    |
| Camptotheca acuminata Cac_g021767 | <b>E</b> AL <b>G</b> R <b>K</b> I <b>A</b> Q <b>T</b> SA <b>K</b> I <b>E</b> K <b>M</b> ER <b>D</b> K <b>A</b> T <b>K</b> E <b>G</b> L <b>K</b> T <b>V</b> A <b>L</b> S <b>T</b> S <b>K</b> I <b>S</b> V <b>L</b> D <b>P</b> R <b>I</b> T <b>V</b> A <b>W</b> C <b>K</b> 868          |
| Ophiorrhiza pumila BAG31373       | <b>E</b> AL <b>E</b> RK <b>I</b> A <b>Q</b> T <b>N</b> A <b>K</b> I <b>E</b> K <b>M</b> ER <b>D</b> K <b>K</b> T <b>K</b> E <b>D</b> L <b>K</b> A <b>V</b> A <b>L</b> S <b>T</b> S <b>K</b> I <b>S</b> V <b>L</b> D <b>P</b> R <b>I</b> T <b>V</b> A <b>W</b> C <b>K</b> 896          |
| Ophiorrhiza liukuensis BAG31374   | <b>E</b> S <b>L</b> E <b>R</b> K <b>I</b> A <b>Q</b> T <b>N</b> A <b>K</b> I <b>E</b> K <b>M</b> ER <b>D</b> K <b>K</b> T <b>K</b> E <b>D</b> L <b>K</b> A <b>V</b> A <b>L</b> S <b>T</b> S <b>K</b> I <b>S</b> V <b>L</b> D <b>P</b> R <b>I</b> T <b>V</b> A <b>W</b> C <b>K</b> 896 |
| Ophiorrhiza japonica BAG31375     | <b>E</b> AL <b>E</b> RK <b>M</b> A <b>I</b> NA <b>K</b> I <b>E</b> K <b>M</b> ER <b>D</b> K <b>E</b> T <b>K</b> E <b>D</b> L <b>K</b> T <b>V</b> A <b>L</b> G <b>T</b> S <b>K</b> I <b>N</b> V <b>L</b> D <b>P</b> R <b>I</b> T <b>V</b> A <b>W</b> C <b>K</b> 897                    |
| Catharanthus roseus BAG31377      | <b>E</b> S <b>L</b> E <b>K</b> K <b>I</b> A <b>Q</b> T <b>N</b> A <b>K</b> I <b>E</b> K <b>M</b> ER <b>D</b> K <b>E</b> T <b>K</b> E <b>D</b> L <b>K</b> T <b>V</b> A <b>L</b> G <b>T</b> S <b>K</b> I <b>N</b> V <b>L</b> D <b>P</b> R <b>I</b> T <b>V</b> A <b>W</b> C <b>K</b> 880 |
| Arabidopsis thaliana NP_200341    | <b>N</b> A <b>W</b> E <b>K</b> I <b>A</b> Q <b>Q</b> S <b>A</b> K <b>I</b> E <b>K</b> M <b>E</b> R <b>D</b> M <b>H</b> T <b>K</b> E <b>D</b> L <b>K</b> T <b>V</b> A <b>L</b> G <b>T</b> S <b>K</b> I <b>N</b> V <b>L</b> D <b>P</b> R <b>I</b> T <b>V</b> A <b>W</b> C <b>K</b> 883  |
| Saccharomyces cerevisiae AAA35162 | <b>E</b> K <b>I</b> K <b>A</b> Q <b>V</b> E <b>K</b> L <b>Q</b> R <b>I</b> Q <b>T</b> S <b>S</b> I <b>Q</b> L <b>K</b> D <b>K</b> E <b>N</b> S <b>Q</b> V <b>S</b> L <b>G</b> T <b>S</b> K <b>I</b> N <b>V</b> I <b>D</b> P <b>R</b> L <b>S</b> V <b>V</b> P <b>C</b> K 738           |

Direct/indirect camptothecin binding

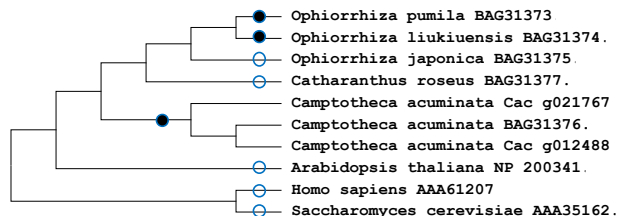

camptothecin

● present

○ absent

Figure 3

[Click here to download Figure Fig\\_3.pptx](#)

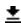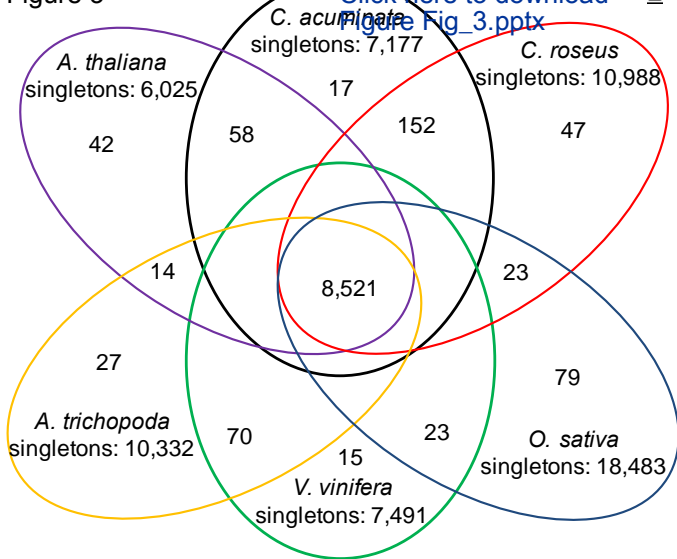

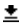

Figure 4

[Click here to download Figure Fig\\_4.pptx](#)

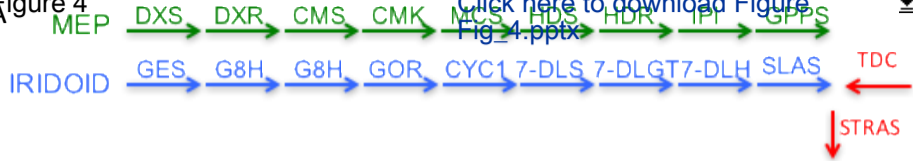

B

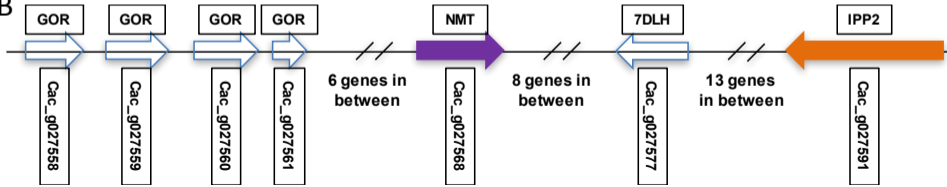

Figure 5

[Click here to download Figure Fig\\_5.pptx](#)

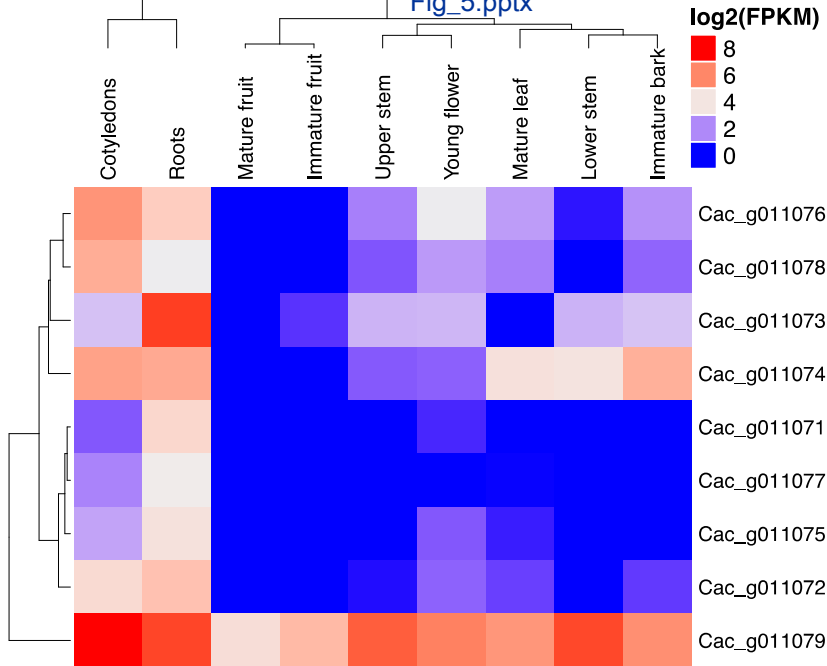

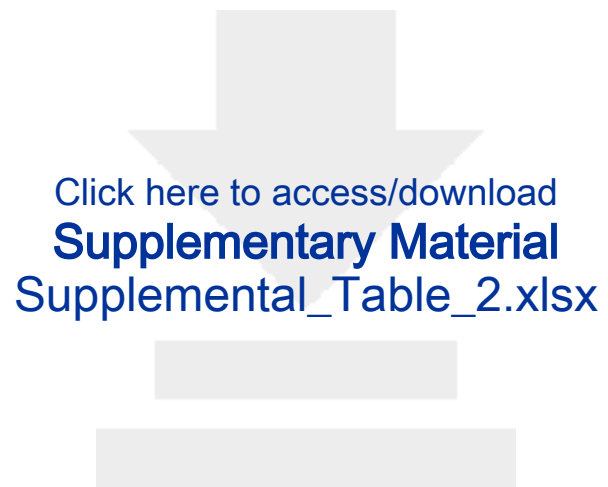

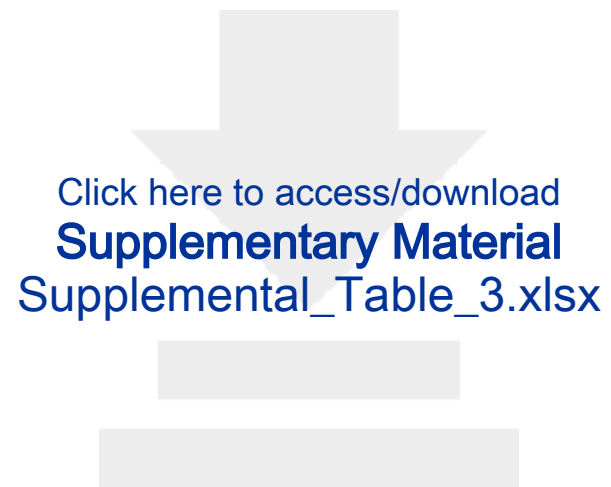

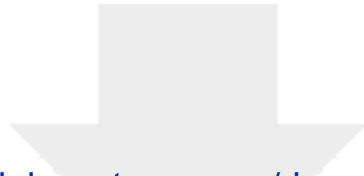

Click here to access/download  
**Supplementary Material**  
Supplemental\_Table\_4.xlsx

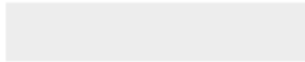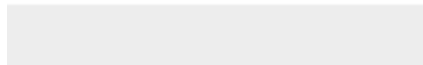

Supplement: gix065_giga-d-17-00067_original-submission.pdf [file gix065_giga-d-17-00067_original-submission.pdf]
