# Supplementary material for: De novo genome assembly of Camptotheca acuminata, a natural source of the anti-cancer compound camptothecin
Source: PubMed Central journal article supplement (PMC5737489; doi:10.1093/gigascience/gix065), 2017-07-24

1  
2  
3  
4  
5  
6  
7  
8  
9  
10  
11  
12  
13  
14  
15  
16  
17  
18  
19  
20  
21  
22  
23  
24  
25  
26  
27  
28  
29  
30  
31  
32  
33  
34  
35  
36  
37  
38  
39  
40  
41  
42  
43  
44  
45  
46  
47  
48  
49  
50  
51  
52  
53  
54  
55  
56  
57  
58  
59  
60  
61  
62  
63  
64  
65

1 ***De novo* genome assembly of *Camptotheca acuminata*, a natural source of the anti-cancer**  
2 **compound camptothecin**

3 Dongyan Zhao<sup>1</sup>, John P. Hamilton<sup>1</sup>, Gina M. Pham<sup>1</sup>, Emily Crisovan<sup>1</sup>, Krystle Wiegert-Rininger<sup>1</sup>,  
4 Brieanne Vaillancourt<sup>1</sup>, Dean DellaPenna<sup>2</sup>, and C. Robin Buell<sup>1\*</sup>

5 <sup>1</sup>Department of Plant Biology, Michigan State University, East Lansing, MI 48824 USA

6 <sup>2</sup>Department of Biochemistry & Molecular Biology, Michigan State University, East Lansing, MI  
7 48824 USA

8 **Email addresses:** Dongyan Zhao <zhaodon4@msu.edu>, John P. Hamilton <jham@msu.edu>,  
9 Gina M. Pham <phamgina@msu.edu>, Emily Crisovan <pankeyem@msu.edu>, Krystle Wiegert-  
10 Rininger <wiegertk@msu.edu>, Brieanne Vaillancourt <vaillan6@msu.edu>, Dean Dellapenna  
11 <dellapen@msu.edu>, C Robin Buell <buell@msu.edu>

12 \*Correspondence should be addressed to: C. Robin Buell, buell@msu.edu

13  
14 **Manuscript type:** Data note

15  
16 **Note:** Reviewers can access the genome sequence and annotation using the following  
17 temporary URL: <http://datadryad.org/review?doi=doi:10.5061/dryad.nc8qr>.

1  
2  
3  
4  
5  
6  
7  
8  
9  
10  
11  
12  
13  
14  
15  
16  
17  
18  
19  
20  
21  
22  
23  
24  
25  
26  
27  
28  
29  
30  
31  
32  
33  
34  
35  
36  
37  
38  
39  
40  
41  
42  
43  
44  
45  
46  
47  
48  
49  
50  
51  
52  
53  
54  
55  
56  
57  
58  
59  
60  
61  
62  
63  
64  
65

18 **Abstract**

19 **Background:** *Camptotheca acuminata* is one of a limited number of species that produce  
20 camptothecin, a pentacyclic quinoline alkaloid with anti-cancer activity due to its ability to  
21 inhibit DNA topoisomerase. While transcriptome studies have been performed previously with  
22 various camptothecin-producing species, no genome sequence for a camptothecin-producing  
23 species is available to date.

24 **Findings:** We generated a high quality *de novo* genome assembly for *C. acuminata* representing  
25 403,174,860 bp on 1,394 scaffolds with an N50 scaffold size of 1,752 kbp. Quality assessments  
26 of the assembly revealed robust representation of the genome sequence including genic  
27 regions. Using a novel genome annotation method, we annotated 31,825 genes encoding  
28 40,332 gene models. Based on sequence identity and orthology with validated genes from  
29 *Catharanthus roseus* as well as Pfam searches, we identified candidate orthologs for genes  
30 potentially involved in camptothecin biosynthesis. Extensive gene duplication including tandem  
31 duplication was widespread in the *C. acuminata* genome with 3,315 genes belonging to 1,245  
32 tandem duplicated gene clusters.

33 **Conclusions:** To our knowledge, this is the first genome sequence for a camptothecin-producing  
34 species, and access to the *C. acuminata* genome will permit not only discovery of genes  
35 encoding the camptothecin biosynthetic pathway but also reagents that can be used for  
36 heterologous expression of camptothecin and camptothecin analogs with novel pharmaceutical  
37 applications.

1  
2  
3  
4  
5  
6  
7  
8  
9  
10  
11  
12  
13  
14  
15  
16  
17  
18  
19  
20  
21  
22  
23  
24  
25  
26  
27  
28  
29  
30  
31  
32  
33  
34  
35  
36  
37  
38  
39  
40  
41  
42  
43  
44  
45  
46  
47  
48  
49  
50  
51  
52  
53  
54  
55  
56  
57  
58  
59  
60  
61  
62  
63  
64  
65

38 **Keywords:** *Camptotheca acuminata*, camptothecin, genome assembly, genome annotation,  
39 tandem duplications

40  
41 **Data Description**

42 **Background information on camptothecin, a key anti-cancer natural product**

43 *Camptotheca acuminata* Decne, also known as the Chinese Happy Tree (Figure 1), is an eudicot  
44 asterid Cornales tropical tree species within the Nyssaceae family [1] that also contains *Nyssa*  
45 spp (tupelo) and *Davidia involucrate* (dove tree); no genome sequence is available for any  
46 member of this family. *C. acuminata* is one of a limited number of plant species that produce  
47 camptothecin, a pentacyclic quinoline alkaloid (Figure 2A) with anti-cancer activity due to its  
48 ability to inhibit DNA topoisomerase [2]. Due to poor solubility, derivatives such as irinotecan  
49 and topotecan, rather than camptothecin are currently in use as approved cancer drugs. The  
50 significance of these derivatives as therapeutics is highlighted by the listing of irinotecan on the  
51 World Health Organization Model List of Essential Medicines [3]. While transcriptome studies  
52 have been performed previously with various camptothecin-producing species including *C.*  
53 *acuminata* and *Ophiorrhiza pumila* (e.g., [4-6]), no genome sequence for a camptothecin-  
54 producing species is available to date. We report on the assembly and annotation of the *C.*  
55 *acuminata* genome, the characterization of genes implicated in camptothecin biosynthesis, and  
56 highlight the extent of gene duplication that provides new templates for gene diversification.

57 **RNA isolation, library construction, sequencing, and transcriptome assembly**

1  
2  
3  
4 58 Transcriptome assemblies were constructed using nine developmental RNA-sequencing (RNA-  
5  
6  
7 59 seq) datasets described in a previous study [4] that included immature bark, cotyledons,  
8  
9  
10 60 immature flower, immature fruit, mature fruit, mature leaf, root, upper stem, and lower stem.  
11  
12 61 Adapters and low-quality nucleotides were removed from the RNA-seq reads using Cutadapt  
13  
14 62 (v1.8) [7] and contaminating ribosomal RNA reads were removed. Cleaned reads from all nine  
15  
16  
17 63 libraries were assembled using Trinity (v20140717) [8] with a normalization factor of 50x using  
18  
19  
20 64 default parameters. Contaminant transcripts (5,669 total) were identified by searching the *de*  
21  
22 65 *novo* transcriptome assembly against the National Center for Biotechnology Information (NCBI)  
23  
24  
25 66 non-redundant nucleotide database using BLAST+ (v2.2.30) [9, 10] with an E-value cutoff of 1e-  
26  
27  
28 67 5; transcripts with their best hits being a non-plant sequence were removed from the  
29  
30 68 transcriptome.

31  
32  
33  
34 69 For additional transcript support for use in a genome-guided transcriptome assembly to  
35  
36 70 support genome annotation, strand-specific RNA-seq reads were generated by isolating RNA  
37  
38  
39 71 from root tissues and sequencing of Kappa TruSeq Stranded libraries on an Illumina HiSeq 2500  
40  
41 72 platform generating 150 nt paired-end reads (BioSample ID: SAMN06229771). Root RNA-seq  
42  
43  
44 73 reads were assessed for quality using FASTQC (v0.11.2) [11] using default parameters and  
45  
46 74 cleaned as described above.

#### 50 75 **DNA isolation, library construction, and sequencing**

51  
52  
53 76 The genome size of *C. acuminata* was estimated at 516 Mb using flow cytometry, suitable for  
54  
55  
56 77 *de novo* assembly using the Illumina platform. DNA was extracted from young leaves of *C.*  
57  
58  
59 78 *acuminata* at the vegetative growth stage using CTAB [12]. Multiple Illumina-compatible paired-

1  
2  
3  
4 79 end libraries (Table 1) with insert sizes ranging from 180-609 bp were constructed as described  
5  
6  
7 80 previously [13] and sequenced to 150 nt in paired-end mode on an Illumina HiSeq2000. Mate-  
8  
9  
10 81 pair libraries (Table 1) with size ranges of 1.3-8.9 kb were made using the Nextera Kit (Illumina,  
11  
12 82 San Diego CA) as per manufacturer's instructions and sequenced to 150 nt in paired-end mode  
13  
14  
15 83 on an Illumina HiSeq2000.

#### 18 84 **Genome assembly**

20  
21 85 Paired-end reads (Table 1) were assessed for quality using FASTQC (v0.11.2) [11] using default  
22  
23  
24 86 parameters, cleaned for adapters and low quality sequences using Cutadapt (v1.8) [7] and only  
25  
26  
27 87 reads in pairs with each read  $\geq 25$  nt were retained for genome assembly. Mate pair libraries  
28  
29  
30 88 (Table 1) were processed using NextClip (v1.3.1) [14] and only reads from Categories A, B, C  
31  
32 89 were used for the assembly. Using ALLPATHS-LG (v44837) [15] with default parameters, two  
33  
34  
35 90 paired-end read libraries (180 and 268 bp insert libraries) and all five mate pair libraries (Table  
36  
37 91 1) were used to generate an initial assembly of 403.2 Mb with an N50 contig size of 108 kbp  
38  
39  
40 92 and an N50 scaffold size of 1,752 kbp (Tables 1 and 2). Gaps (5,076) in this initial assembly were  
41  
42  
43 93 filled using SOAP GapCloser (v1.12r6) [16] with four independent paired-end libraries (352, 429,  
44  
45 94 585, and 609 bp inserts, Table 1); 12,468,362 bp of the estimated 16,471,841 bp of gaps was  
46  
47  
48 95 filled leaving a total of 3,825 gaps (3,772,191 Ns). The assembly was checked for contaminant  
49  
50  
51 96 sequences based on alignments to the NCBI non-redundant nucleotide database using BLASTN  
52  
53 97 (E-value =  $1e-5$ ) [10]; a single scaffold of 5,156 bp that matched a bacterium sequence with  
54  
55 98 100% coverage and 100% identity was removed. Subsequently, five scaffolds less than 1 kbp  
56  
57  
58  
59  
60  
61  
62  
63  
64  
65

1  
2  
3  
4 99 were removed resulting in the final assembly of 403,174,860 bp comprised of 1,394 scaffolds  
5  
6  
7 100 with an N50 scaffold size of 1,752 kbp (Tables 1 and 2) and 0.9% Ns.  
8  
9

10 101 Quality assessments revealed a robust high quality assembly with 98% of the paired-end  
11  
12  
13 102 genomic sequencing reads aligning to the assembly, of which, 99.97% aligned concordantly.  
14  
15 103 With respect to genic representation, 95.3% of RNA-seq-derived transcript assemblies [4] and  
16  
17  
18 104 74,119 of 74,682 (99%) pyrosequencing transcript reads from a separate study [5] aligned to  
19  
20  
21 105 the genome assembly. A total of 93.6% of conserved Embryophyta BUSCO proteins were  
22  
23 106 present in the assembly as full-length sequences with an additional 2.5% of the Embryophyta  
24  
25  
26 107 proteins fragmented [17].  
27  
28

## 29 108 **Genome annotation**

30  
31  
32

33 109 We used a novel genome annotation method to generate high quality annotation of the *C.*  
34  
35 110 *acuminata* genome in which we repeat masked the genome, trained an *ab initio* gene finder  
36  
37  
38 111 with a genome-guided transcript assembly, and then refined the gene models using additional  
39  
40  
41 112 genome-guided transcript assembly evidence to generate a high quality gene model set. We  
42  
43 113 first created a *C. acuminata* specific custom repeat library (CRL) using MITE-Hunter (v2011) [18]  
44  
45  
46 114 and RepeatModeler (v1.0.8) [19]. Protein coding genes were removed from each repeat library  
47  
48 115 using ProtExcluder.pl (v1.1) [20] and combined into a single CRL, which hard-masked 143.6 Mb  
49  
50  
51 116 (35.6%) of the assembly as repetitive sequence using RepeatMasker (v4.0.6) [21]. Cleaned root  
52  
53  
54 117 RNA-seq reads (Table S1, BioSample ID: SAMN06229771) were aligned to the genome assembly  
55  
56 118 using TopHat2 (v2.0.13) [22] in strand-specific mode with a minimum intron length of 20 bp and  
57  
58  
59 119 a maximum intron length of 20 kb; the alignments were then used to create a genome-guided  
60  
61  
62  
63  
64  
65

1  
2  
3  
4 120 transcriptome assembly using Trinity (v2.2.0) [23]. The RNA-seq alignments were used to train  
5  
6  
7 121 AUGUSTUS (v3.1) [24] and gene predictions were generated with AUGUSTUS [25] using the  
8  
9  
10 122 hard-masked assembly. Gene model structures were refined by incorporating evidence from  
11  
12 123 the genome-guided transcriptome assembly using PASA2 (v2.0.2) [26, 27]; with the parameters:  
13  
14 124 MIN\_PERCENT\_ALIGNED=90, MIN\_AVG\_PER\_ID=99. After annotation comparison, models that  
15  
16  
17 125 PASA identified as being merged and a subset of candidate camptothecin biosynthetic  
18  
19  
20 126 pathways genes identified as mis-annotated were manually curated. The final high-confidence  
21  
22 127 gene model set consists of 31,825 genes encoding 40,332 gene models. Functional annotation  
23  
24  
25 128 was assigned using a custom pipeline using WU-BLASTP [28] searches against the *Arabidopsis*  
26  
27  
28 129 *thaliana* annotation (TAIR10; [29]) and Swiss-Prot plant proteins (downloaded on 08-17-2015),  
29  
30 130 and a search against Pfam (v29) using HMMER (v3.1b2) [30]. This resulted in 34,143 gene  
31  
32  
33 131 models assigned a putative function, 2,011 annotated as conserved hypothetical, and 4,178  
34  
35 132 annotated as hypothetical.

36  
37  
38  
39 133 *C. acuminata* is insensitive to camptothecin due to mutations within its own DNA  
40  
41 134 topoisomerase [31] and we identified two topoisomerase genes in our annotated gene set, one  
42  
43  
44 135 of which matches the published *C. acuminata* topoisomerase (99.78% identity, 100% coverage)  
45  
46  
47 136 and includes the two mutations that confer resistance to camptothecin (Figure 2B), one  
48  
49 137 mutation is specific in *C. acuminata* and the other is present in both *C. acuminata* and two  
50  
51  
52 138 camptothecin-producing *Ophiorrhiza* species. Further quality assessments of our annotation  
53  
54 139 with 35 nuclear-encoded *C. acuminata* genes available from GenBank revealed an average  
55  
56  
57 140 identity of 99.5% with 100% coverage in our annotated proteome while a single gene encoding  
58  
59 141 1-deoxy-D-xylulose 5-phosphate reductoisomerase (ABC86579.1) had 88.2% identity with 100%

1  
2  
3  
4 142 coverage that may be attributable to differences in genotypes. One mRNA reported to encode a  
5  
6  
7 143 putative strictosidine beta-D-glucosidase (AES93119.1) was found to have a retained intron that  
8  
9  
10 144 when removed, aligned with 99.3% identity yet reduced coverage (66%) as it was located at the  
11  
12 145 end of a short scaffold. Collectively, the concordant alignment of whole genome shotgun  
13  
14 146 sequence reads to the assembly, the high representation of genic regions as assessed by  
15  
16  
17 147 independent transcriptome datasets (RNA-seq and pyrosequencing) as well as the core  
18  
19  
20 148 Embryophyta BUSCO proteins, when coupled with the high quality gene models as revealed  
21  
22 149 through alignments with cloned *C. acuminata* genes indicate that we have not only generated a  
23  
24  
25 150 high quality genome assembly for *C. acuminata* but also a robust set of annotated gene models.  
26  
27

#### 28 151 **Gene duplication and orthology analyses**

30  
31  
32 152 During our annotation efforts, it was readily apparent that there was substantial gene  
33  
34 153 duplication including tandem gene duplication in the *C. acuminata* genome. Paralogous  
35  
36  
37 154 clustering of the *C. acuminata* proteome revealed 5,768 paralogous groups containing 17,957  
38  
39  
40 155 genes. We identified tandem gene duplications in the *C. acuminata* genome based on if: 1) two  
41  
42 156 or more *C. acuminata* genes were present within an orthologous/paralogous group; 2) there  
43  
44  
45 157 were no more than 10 genes in between on a single scaffold; and 3) the pairwise gene distance  
46  
47  
48 158 was less than 100 kbp [32]. Under these criteria, a total of 3,315 genes belonging to 1,245  
49  
50 159 tandem duplicated gene clusters were identified. Gene ontology analysis showed that tandem  
51  
52  
53 160 duplicated genes are significantly enriched in “response to stress” ( $p < 0.0001$ ,  $\chi^2$  test) while  
54  
55 161 under-represented in most other processes, especially “other cellular processes” and “cell  
56  
57  
58 162 organization and biogenesis” ( $p < 0.0001$ ,  $\chi^2$  test).  
59  
60  
61  
62  
63  
64  
65



1  
2  
3  
4 163 To our knowledge, *C. acuminata* is the first species within the Nyssaceae family with a genome  
5  
6  
7 164 sequence. To better understand the evolutionary relationship of *C. acuminata* with other  
8  
9  
10 165 asterids and angiosperms, we identified orthologous and paralogous groups using our  
11  
12 166 annotated *C. acuminata* proteome and the proteomes of five other key species (*Arabidopsis*  
13  
14 167 *thaliana*, *Amborella trichopoda*, *Vitis vinifera*, *Oryza sativa*, and *Catharanthus roseus*) using  
15  
16  
17 168 OrthoFinder (v0.7.1) [33] with default parameters. A total of 12,459 orthologous groups  
18  
19  
20 169 containing at least a single *C. acuminata* protein were identified with 8,521 orthologous groups  
21  
22 170 common to all six species (Figure 3; Table S2). Interestingly, *C. acuminata* contains the least  
23  
24  
25 171 number of singleton genes (7,177) among the six species, and gene ontology analysis  
26  
27  
28 172 demonstrated that these genes were highly enriched in “transport”, “response to stress”, and  
29  
30 173 “other cellular and biological processes” ( $p < 0.0001$ ,  $\chi^2$  test) while dramatically under-  
31  
32  
33 174 represented in “unknown biological processes” ( $p < 0.0001$ ,  $\chi^2$  test), suggesting these genes  
34  
35 175 may be involved in stress responses and other processes specific to *C. acuminata*.

#### 36 37 38 39 176 **Uses for the *C. acuminata* genome sequence and annotation**

40  
41  
42 177 Generation of a high-quality genome sequence and annotation dataset for *C. acuminata* will  
43  
44  
45 178 facilitate discovery of genes encoding camptothecin biosynthesis as physical clustering can be  
46  
47  
48 179 combined with sequence similarity and co-expression data to identify candidate genes, an  
49  
50 180 approach that has been extremely useful in identifying genes in specialized metabolism in a  
51  
52  
53 181 number of plant species (see [34-36]). In *C. acuminata*, geranylgeranyl diphosphate from the 2-  
54  
55 182 C-methyl-D-erythritol 4-phosphate/1-deoxy-D-xylulose 5-phosphate (MEP) pathway is used to  
56  
57  
58 183 generate secologanic acid via the iridoid pathway and tryptamine from tryptophan  
59  
60  
61  
62  
63  
64  
65

1  
2  
3  
4 184 decarboxylase are condensed by strictosidinic acid synthase to generate strictosidinic acid that  
5  
6  
7 185 is then converted into camptothecin in the alkaloid pathway via a set of unknown steps [37]  
8  
9  
10 186 (Figure 4A). *Catharanthus roseus*, Madagascar periwinkle, produces vinblastine and vincristine  
11  
12 187 via the MEP and iridoid pathways for which all genes leading to the biosynthesis of the iridoid  
13  
14  
15 188 secologanin have been characterized [35]. Using sequence identity and coverage with  
16  
17 189 characterized *C. roseus* genes from the MEP and iridoid pathway (Figure 4A), we were able to  
18  
19  
20 190 identify candidate genes for all steps in the MEP and iridoid pathway in *C. acuminata* (Table 3).  
21  
22 191 The downstream steps in camptothecin biosynthesis subsequent to formation of strictosidinic  
23  
24  
25 192 acid involve a broad set of enzymes responsible for reduction and oxidation [37] and a total of  
26  
27  
28 193 343 cytochrome P450s (60 paralogous gene clusters and 86 singletons; Table S3) were  
29  
30 194 identified which can serve as candidates for the later steps in camptothecin biosynthesis.  
31  
32  
33 195 Though not absolute, physical clustering of genes involved in specialized metabolism has been  
34  
35  
36 196 observed in a number of species across a number of classes of specialized metabolites [34, 38].  
37  
38  
39 197 With an N50 scaffold size of 1,752 kbp, we observed several instances of physical clustering of  
40  
41  
42 198 genes with homology to genes involved in monoterpene indole alkaloid biosynthesis which may  
43  
44 199 produce related compounds in *C. acuminata*. Using characterized genes involved in the  
45  
46  
47 200 biosynthesis of vinblastine and vincristine from *C. roseus* as queries [35] (Figure 4A, Table 3), we  
48  
49 201 identified a single *C. acuminata* scaffold (907 kbp, 86 genes; Figure 4B) that encoded genes with  
50  
51  
52 202 sequence identity to isopentenyl diphosphate isomerase II within the MEP pathway, 8-  
53  
54  
55 203 hydroxygeraniol oxidoreductase (GOR, three complete and one partial paralogs), 7-  
56  
57 204 deoxyloganic acid 7-hydroxylase (7DLH) within the iridoid pathway, and a protein with  
58  
59  
60 205 homology to *C. roseus* 16-hydroxy-2,3-dihydro-3-hydroxytabersonine N-methyltransferase  
61  
62  
63  
64  
65

1  
2  
3  
4 206 (NMT) within the alkaloid pathway suggesting that access to a high contiguity genome assembly  
5  
6  
7 207 may facilitate discovery of genes involved in specialized metabolism in *C. acuminata*. Tandem  
8  
9  
10 208 duplications of genes involved in specialized metabolism have been reported previously [39, 40]  
11  
12 209 and via divergence either in the coding region or promoter sequence which lead to neo- and  
13  
14  
15 210 sub-functionalization at the enzymatic or expression level, respectively, have been shown to  
16  
17 211 contribute to the extensive chemical diversity within a species [40, 41].  
18  
19

20  
21 212 The *C. acuminata* genome can also be used to facilitate our understanding of the mechanisms  
22  
23 213 by which camptothecin production evolved independently in distinct taxa such as *C. acuminata*  
24  
25  
26 214 (*Nyssaceae*) and *O. pumila* (*Rubiaceae*). For example, a comparative analysis of *C. acuminata*  
27  
28  
29 215 and *O. pumila* may be highly informative in not only delineating genes involved in camptothecin  
30  
31 216 biosynthesis but also in revealing key evolutionary events that led to biosynthesis of this critical  
32  
33  
34 217 natural product across a wide phylogenetic distance. As noted above, camptothecin is  
35  
36 218 cytotoxic and as a consequence, derivatives of camptothecin are used as anti-cancer drugs.  
37  
38  
39 219 Perhaps most exciting, the ability to decipher the full camptothecin biosynthetic pathway will  
40  
41 220 yield molecular reagents that can be used to not only synthesize camptothecin in heterologous  
42  
43  
44 221 systems such as yeast, but also produce less toxic analogs with novel pharmaceutical  
45  
46 222 applications.  
47  
48

#### 50 223 **Availability of Supporting Information**

51  
52

53 224 Raw genomic sequence reads and transcriptome reads derived from root tissues are available  
54  
55  
56 225 in the NCBI Sequence Read Archive under project number PRJNA361128. All other RNA-seq  
57  
58  
59 226 transcriptome reads were from Bioproject PRJNA80029 [4]. The genome assembly and  
60  
61  
62  
63  
64  
65

1  
2  
3  
4  
5  
6  
7  
8  
9  
10  
11  
12  
13  
14  
15  
16  
17  
18  
19  
20  
21  
22  
23  
24  
25  
26  
27  
28  
29  
30  
31  
32  
33  
34  
35  
36  
37  
38  
39  
40  
41  
42  
43  
44  
45  
46  
47  
48  
49  
50  
51  
52  
53  
54  
55  
56  
57  
58  
59  
60  
61  
62  
63  
64  
65

227 annotation are available in the Dryad Digital Repository under doi (to be released upon  
228 publication), through the Medicinal Plant Genomics Resource [42] via a genome browser and  
229 search and analysis tools, and GigaDB.

230 **Note:** Reviewers can access the genome sequence and annotation using the following  
231 temporary URL: <http://datadryad.org/review?doi=doi:10.5061/dryad.nc8qr>.

232

233 **Abbreviations**

234 2-C-methyl-D-erythritol 4-phosphate/1-deoxy-D-xylulose 5-phosphate (MEP), 7-deoxyloganic  
235 acid 7-hydroxylase (7DLH), 8-hydroxygeraniol oxidoreductase (GOR), 16-hydroxy-2,3-dihydro-3-  
236 hydroxytabersonine N-methyltransferase (NMT), custom repeat library (CRL), National Center  
237 for Biotechnology Information (NCBI), RNA-sequencing (RNA-seq)

238 **Competing Interests**

239 The authors have declared that no competing interests exists.

240 **Author Contributions**

241 CRB oversaw the project. DZ performed the genome assembly, assisted in genome annotation  
242 and analyzed data. JH annotated the genome and analyzed data. EC, GP, and KWR constructed  
243 libraries and analyzed data. BV analyzed data. DDP provided intellectual oversight. DZ, JH, and  
244 CRB wrote the manuscript.

245 **Acknowledgements**

1  
2  
3  
4  
5  
6  
7  
8  
9  
10  
11  
12  
13  
14  
15  
16  
17  
18  
19  
20  
21  
22  
23  
24  
25  
26  
27  
28  
29  
30  
31  
32  
33  
34  
35  
36  
37  
38  
39  
40  
41  
42  
43  
44  
45  
46  
47  
48  
49  
50  
51  
52  
53  
54  
55  
56  
57  
58  
59  
60  
61  
62  
63  
64  
65

246 Funding for this work was provided in part by a grant to CRB and DDP from the National  
247 Institute of General Medical Sciences (1RC2GM092521) and funds to CRB and DDP from  
248 Michigan State University. The funders had no role in study design, data collection and analysis,  
249 decision to publish, or preparation of the manuscript.

1  
2  
3  
4  
5  
6  
7  
8  
9  
10  
11  
12  
13  
14  
15  
16  
17  
18  
19  
20  
21  
22  
23  
24  
25  
26  
27  
28  
29  
30  
31  
32  
33  
34  
35  
36  
37  
38  
39  
40  
41  
42  
43  
44  
45  
46  
47  
48  
49  
50  
51  
52  
53  
54  
55  
56  
57  
58  
59  
60  
61  
62  
63  
64  
65

250 **Figure Legends**

251 **Figure 1. *Camptotheca acuminata* Decne, the Chinese Happy Tree, is a member in the**  
252 **Nyssaceae family that produces the anticancer compound camptothecin.**

253 **Figure 2. Genome aspects of *Camptotheca acuminata*. (A) Structure of camptothecin. (B) Key**  
254 **amino acid mutations (red rectangles) in DNA topoisomerase I in camptothecin-producing**  
255 **and non-producing species and their phylogenetic relationship.**

256 **Figure 3. Venn diagram showing orthologous and paralogous groups between *Camptotheca***  
257 ***acuminata*, *Amborella trichopoda*, *Oryza sativa*, *Arabidopsis thaliana*, *Vitis vinifera*, and**  
258 ***Catharanthus roseus*.**

259 **Figure 4. Key portions of the proposed camptothecin biosynthetic pathway and an example of**  
260 **physical clustering of candidate genes in *Camptotheca acuminata*. (A) The methylerythritol**  
261 **phosphate (MEP) pathway (green), iridoid pathway (blue), and condensation of secologanic**  
262 **acid with tryptamine via strictosidinic acid synthase (STRAS) to form strictosidinic acid prior**  
263 **to downstream dehydration, reduction, and oxidation steps yielding camptothecin. DXS, 1-**  
264 **deoxy-D-xylulose 5-phosphate synthase 2; DXR, 1-deoxy-D-xylulose-5-phosphate**  
265 **reductoisomerase; CMS, 4-diphosphocytidyl-methylerythritol 2-phosphate synthase; CMK, 4-**  
266 **diphosphocytidyl-2-C-methyl-D-erythritol kinase; MCS, 2C-methyl-D-erythritol 2,4-**  
267 **cyclodiphosphate synthase; HDS, GCPE protein; HDR, 1-hydroxy-2-methyl-butenyl 4-**  
268 **diphosphate reductase; IPI, plastid isopentenyl pyrophosphate, dimethylallyl pyrophosphate**  
269 **isomerase; GPPS, geranyl pyrophosphate synthase; GES, plastid geraniol synthase; G8H,**  
270 **geraniol 8-hydroxylase; GOR, 8-hydroxygeraniol oxidoreductase; CYC1, iridoid cyclase 1; 7-DLS,**

1  
2  
3  
4  
5  
6  
7  
8  
9  
10  
11  
12  
13  
14  
15  
16  
17  
18  
19  
20  
21  
22  
23  
24  
25  
26  
27  
28  
29  
30  
31  
32  
33  
34  
35  
36  
37  
38  
39  
40  
41  
42  
43  
44  
45  
46  
47  
48  
49  
50  
51  
52  
53  
54  
55  
56  
57  
58  
59  
60  
61  
62  
63  
64  
65

271 7-deoxyloganetic acid synthase; 7-DLGT, 7-deoxyloganetic acid glucosyltransferase; 7-DLH, 7-deoxyloganic acid hydroxylase; SLAS, secologanic acid synthase; TDC, tryptophan decarboxylase.

273 **(B) Physical clustering of homologs of genes involved in the methylerythritol phosphate, iridoid, and alkaloid biosynthetic pathways of *Catharanthus roseus* on scaffold 151 of *C.***

274 ***acuminata*.** GOR: 8-hydroxygeraniol oxidoreductase; NMT: 16-hydroxy-2,3-dihydro-3-hydroxytabersonine N-methyltransferase; 7DLH: 7-deoxyloganic acid 7-hydroxylase; IPP2: isopentenyl diphosphate isomerase II. Gene IDs are below the arrows.

278

279 **Table 1. Input libraries and sequences for *de novo* assembly of the *Camptotheca acuminata***  
 280 **genome.**

| BioProject ID     | BioSample ID | Fragment size (bp) | No. of cleaned read pairs | Use                  |
|-------------------|--------------|--------------------|---------------------------|----------------------|
| <b>Paired end</b> |              |                    |                           |                      |
| PRJNA361128       | SAMN06220985 | 180                | 96,955,546                | ALLPATHS-LG assembly |
| PRJNA361128       | SAMN06220986 | 268                | 89,381,055                | ALLPATHS-LG assembly |
| PRJNA361128       | SAMN06220987 | 352                | 61,207,691                | GapCloser            |
| PRJNA361128       | SAMN06220988 | 429                | 50,688,562                | GapCloser            |
| PRJNA361128       | SAMN06220989 | 585                | 21,856,610                | GapCloser            |
| PRJNA361128       | SAMN06220990 | 609                | 22,217,954                | GapCloser            |
| <b>Mate pair</b>  |              |                    |                           |                      |
| PRJNA361128       | SAMN06220991 | 8,111              | 9,923,643                 | ALLPATHS-LG assembly |
| PRJNA361128       | SAMN06220992 | 7,911              | 7,652,519                 | ALLPATHS-LG assembly |
| PRJNA361128       | SAMN06220993 | 1,377              | 12,800,554                | ALLPATHS-LG assembly |
| PRJNA361128       | SAMN06220994 | 3,179              | 13,138,503                | ALLPATHS-LG assembly |
| PRJNA361128       | SAMN06220995 | 8,879              | 13,599,241                | ALLPATHS-LG assembly |

All libraries were sequenced in paired end mode generating 150 nt reads.



1  
2  
3  
4  
5  
6  
7  
8  
9  
10  
11  
12  
13  
14  
15  
16  
17  
18  
19  
20  
21  
22  
23  
24  
25  
26  
27  
28  
29  
30  
31  
32  
33  
34  
35  
36  
37  
38  
39  
40  
41  
42  
43  
44  
45  
46  
47  
48  
49  
50  
51  
52  
53  
54  
55  
56  
57  
58  
59  
60  
61  
62  
63  
64  
65

282 **Table 2. Metrics of the final assembly of *Camptotheca acuminata* genome.**

| Metric                       | Value            |
|------------------------------|------------------|
| Total scaffold length (bp)   | 403,174,860      |
| Total no. of scaffolds (bp)  | 1,394            |
| Maximum scaffold length (bp) | 8,423,530        |
| Minimum scaffold length (bp) | 1,002            |
| N50 scaffold size (bp)       | 1,751,747        |
| N50 contig size (bp)         | 107,594          |
| No. Ns                       | 3,772,191 (0.9%) |
| No. gaps                     | 3,825            |

283

14  
15  
16  
17  
18  
19  
20  
21  
22  
23  
24  
25  
26  
27  
28  
29  
30  
31  
32  
33  
34  
35  
36  
37  
38  
39  
40  
41  
42  
43  
44  
45  
46  
47  
48  
49  
50  
51  
52  
53  
54  
55  
56  
57  
58  
59  
60  
61  
62  
63  
64  
65

284 **Table 3. Identification of candidate camptothecin biosynthetic pathway genes in the *Camptotheca acuminata* genome as revealed**  
 285 **by sequence identity and coverage with characterized genes from the 2-C-methyl-D-erythritol 4-phosphate/1-deoxy-D-xylulose 5-**  
 286 **phosphate and iridoid biosynthetic pathways from *Catharanthus roseus*.**

| Description                                                             | Abbreviation | Protein    | Camptotheca Gene ID | % coverage | % identity |
|-------------------------------------------------------------------------|--------------|------------|---------------------|------------|------------|
| <b>MEP</b>                                                              |              |            |                     |            |            |
| 1-deoxy-D-xylulose 5-phosphate synthase 2                               | DXS          | ABI35993.1 | Cac_g024944.t1      | 98         | 77.60      |
| 1-deoxy-D-xylulose-5-phosphate reductoisomerase                         | DXR          | AAF65154.1 | Cac_g016318.t1      | 100        | 88.82      |
| 4-diphosphocytidyl-methylerythritol 2-phosphate synthase                | CMS          | ACI16377.1 | Cac_g018722.t1      | 88         | 77.82      |
| 4-diphosphocytidyl-2-C-methyl-D-erythritol kinase                       | CMK          | ABI35992.1 | Cac_g021688.t1      | 99         | 76.17      |
| 2C-methyl-D-erythritol 2,4-cyclodiphosphate synthase                    | MCS          | AAF65155.1 | Cac_g008169.t1      | 100        | 73.77      |
| GCPE protein                                                            | HDS          | AAO24774.1 | Cac_g022763.t1      | 100        | 88.65      |
| 1-hydroxy-2-methyl-butenyl 4-diphosphate reductase                      | HDR          | ABI30631.1 | Cac_g014659.t1      | 100        | 83.77      |
| plastid isopentenyl pyrophosphate:dimethylallyl pyrophosphate isomerase | IPI          | ABW98669.1 | Cac_g008847.t1      | 76         | 91.06      |
| geranyl pyrophosphate synthase                                          | GPPS         | ACC77966.1 | Cac_g026508.t1      | 51         | 76.50      |
| <b>Iridoid</b>                                                          |              |            |                     |            |            |
| geraniol 8-hydroxylase                                                  | G8H          | CAC80883.1 | Cac_g017987.t1      | 95         | 76.71      |
| 8-hydroxygeraniol oxidoreductase                                        | GOR          | AHK60836.1 | Cac_g027560.t1      | 100        | 71.69      |
| iridoid synthase                                                        | ISY          | AFW98981.1 | Cac_g006027.t1      | 100        | 65.65      |
| iridoid oxidase                                                         | IO           | AHK60833.1 | Cac_g032709.t1      | 97         | 78.44      |
| UDP-glucose iridoid glucosyltransferase                                 | 7DLGT        | BAO01109.1 | Cac_g008744.t1      | 100        | 77.11      |
| 7-deoxyloganic acid 7-hydroxylase                                       | 7DLH         | AGX93062.1 | Cac_g012663.t1      | 96         | 69.58      |
| loganic acid methyltransferase                                          | LAMT         | ABW38009.1 | Cac_g005179.t1      | 95         | 53.91      |
| secologanin synthase                                                    | SLS          | AAA33106.1 | Cac_g012666.t1      | 99         | 64.94      |

Note: Only the top hit from the BLAST search is presented.

1  
2  
3  
4 287 **References**  
5  
6  
7

- 8 288 1. Angiosperm Phylogeny Group III. An update of the Angiosperm Phylogeny Group classification  
9 289 for the orders and families of flowering plants: APG III. *Botanical Journal of the Linnean Society*.  
10 290 2009;161:105-21.  
11 291 2. Lorence A, Nessler, C.L. Molecules of Interest: Camptothecin, over four decades of surprising  
12 292 findings. *Phytochemistry*. 2004; 65:2735–49.  
13 293 3. World Health Organization: 19th WHO Model List of Essential Medicines.  
14 294 [http://www.who.int/medicines/publications/essentialmedicines/EML2015\\_8-May-15.pdf](http://www.who.int/medicines/publications/essentialmedicines/EML2015_8-May-15.pdf).  
15 295 Accessed 26 March 2017.  
16 296 4. Gongora-Castillo E, Childs KL, Fedewa G, Hamilton JP, Liscombe DK, Magallanes-Lundback M, et  
17 297 al. Development of transcriptomic resources for interrogating the biosynthesis of monoterpene  
18 298 indole alkaloids in medicinal plant species. *PLoS One*. 2012;7 12:e52506.  
19 299 doi:10.1371/journal.pone.0052506.  
20 300 5. Sun Y, Luo H, Li Y, Sun C, Song J, Niu Y, et al. Pyrosequencing of the *Camptotheca acuminata*  
21 301 transcriptome reveals putative genes involved in camptothecin biosynthesis and transport. *BMC*  
22 302 *Genomics*. 2011;12:533. doi:10.1186/1471-2164-12-533.  
23 303 6. Yamazaki M, Mochida K, Asano T, Nakabayashi R, Chiba M, Udomson N, et al. Coupling deep  
24 304 transcriptome analysis with untargeted metabolic profiling in *Ophiorrhiza pumila* to further the  
25 305 understanding of the biosynthesis of the anti-cancer alkaloid camptothecin and anthraquinones.  
26 306 *Plant Cell Physiol*. 2013;54 5:686-96. doi:10.1093/pcp/pct040.  
27 307 7. Martin M. Cutadapt removes adapter sequences from high-throughput sequencing reads.  
28 308 *EMBnetjournal*. 2011;17 1 doi:<http://dx.doi.org/10.14806/ej.17.1.200>.  
29 309 8. Haas BJ, Papanicolaou A, Yassour M, Grabherr M, Blood PD, Bowden J, et al. De novo transcript  
30 310 sequence reconstruction from RNA-seq using the Trinity platform for reference generation and  
31 311 analysis. *Nat Protoc*. 2013;8 8:1494-512. doi:10.1038/nprot.2013.084.  
32 312 9. Altschul SF, Madden TL, Schaffer AA, Zhang J, Zhang Z, Miller W, et al. Gapped BLAST and PSI-  
33 313 BLAST: a new generation of protein database search programs. *Nucleic Acids Res*. 1997;25  
34 314 17:3389-402.  
35 315 10. Camacho C, Coulouris G, Avagyan V, Ma N, Papadopoulos J, Bealer K, et al. BLAST+: architecture  
36 316 and applications. *BMC Bioinformatics*. 2009;10:421. doi:10.1186/1471-2105-10-421.  
37 317 11. FastQC. <http://www.bioinformatics.babraham.ac.uk/projects/fastqc/>. Accessed 26 March 2017.  
38 318 12. Saghai-Marroof MA, Soliman KM, Jorgensen RA and Allard RW. Ribosomal DNA spacer-length  
39 319 polymorphisms in barley - Mendelian inheritance, chromosomal location, and population-  
40 320 dynamics. *PRoc Natl Acad USA*. 1984;81 24:8014-8. doi:Doi 10.1073/Pnas.81.24.8014.  
41 321 13. Hardigan MA, Crisovan E, Hamilton JP, Kim J, Laimbeer P, Leisner CP, et al. Genome Reduction  
42 322 Uncovers a Large Dispensable Genome and Adaptive Role for Copy Number Variation in  
43 323 Asexually Propagated *Solanum tuberosum*. *Plant Cell*. 2016;28 2:388-405.  
44 324 doi:10.1105/tpc.15.00538.  
45 325 14. Leggett RM, Clavijo BJ, Clissold L, Clark MD and Caccamo M. NextClip: an analysis and read  
46 326 preparation tool for Nextera Long Mate Pair libraries. *Bioinformatics*. 2014;30 4:566-8.  
47 327 doi:10.1093/bioinformatics/btt702.  
48 328 15. Gnerre S, Maccallum I, Przybylski D, Ribeiro FJ, Burton JN, Walker BJ, et al. High-quality draft  
49 329 assemblies of mammalian genomes from massively parallel sequence data. *Proc Natl Acad Sci U*  
50 330 *S A*. 2011;108 4:1513-8. doi:1017351108 [pii]10.1073/pnas.1017351108.  
51  
52  
53  
54  
55  
56  
57  
58  
59  
60  
61  
62  
63  
64  
65

1  
2  
3  
4 331 16. Luo R, Liu B, Xie Y, Li Z, Huang W, Yuan J, et al. SOAPdenovo2: an empirically improved memory-  
5 332 efficient short-read de novo assembler. *Gigascience*. 2012;1 1:18. doi:10.1186/2047-217X-1-18.  
6 333 17. Simao FA, Waterhouse RM, Ioannidis P, Kriventseva EV and Zdobnov EM. BUSCO: assessing  
7 334 genome assembly and annotation completeness with single-copy orthologs. *Bioinformatics*.  
8 335 2015;31 19:3210-2. doi:10.1093/bioinformatics/btv351.  
9 336 18. Han Y and Wessler SR. MITE-Hunter: a program for discovering miniature inverted-repeat  
10 337 transposable elements from genomic sequences. *Nucleic Acids Res*. 2010;38 22:e199.  
11 338 doi:10.1093/nar/gkq862.  
12 339 19. Repeat Modeler. <http://www.repeatmasker.org/>. Accessed 26 March 2017.  
13 340 20. Campbell MS, Law M, Holt C, Stein JC, Moghe GD, Hufnagel DE, et al. MAKER-P: a tool kit for the  
14 341 rapid creation, management, and quality control of plant genome annotations. *Plant Physiol*.  
15 342 2014;164 2:513-24. doi:10.1104/pp.113.230144.  
16 343 21. RepeatMasker. <http://www.repeatmasker.org/>. Accessed 26 March 2017.  
17 344 22. Kim D, Pertea G, Trapnell C, Pimentel H, Kelley R and Salzberg SL. TopHat2: accurate alignment  
18 345 of transcriptomes in the presence of insertions, deletions and gene fusions. *Genome Biol*.  
19 346 2013;14 4:R36. doi:10.1186/gb-2013-14-4-r36.  
20 347 23. Grabherr MG, Haas BJ, Yassour M, Levin JZ, Thompson DA, Amit I, et al. Full-length  
21 348 transcriptome assembly from RNA-Seq data without a reference genome. *Nature Biotechnology*.  
22 349 2011;29 7:644-52. doi:10.1038/nbt.1883.  
23 350 24. Stanke M, Schoffmann O, Morgenstern B and Waack S. Gene prediction in eukaryotes with a  
24 351 generalized hidden Markov model that uses hints from external sources. *BMC Bioinformatics*.  
25 352 2006;7:62.  
26 353 25. Stanke M and Morgenstern B. AUGUSTUS: a web server for gene prediction in eukaryotes that  
27 354 allows user-defined constraints. *Nucleic Acids Res*. 2005;33 Web Server issue:W465-7.  
28 355 doi:10.1093/nar/gki458.  
29 356 26. PASA2. <http://pasapipeline.github.io/>. Accessed 26 March 2017.  
30 357 27. Haas BJ, Delcher AL, Mount SM, Wortman JR, Smith RK, Jr., Hannick LI, et al. Improving the  
31 358 Arabidopsis genome annotation using maximal transcript alignment assemblies. *Nucleic Acids*  
32 359 *Res*. 2003;31 19:5654-66.  
33 360 28. Altschul SF and Gish W. Local alignment statistics. *Methods Enzymol*. 1996;266:460-80.  
34 361 29. The Arabidopsis Information Resource. Arabidopsis.org. Accessed 26 March 2017.  
35 362 30. Eddy SR. Accelerated Profile HMM Searches. *PLoS Comput Biol*. 2011;7 10:e1002195.  
36 363 doi:10.1371/journal.pcbi.1002195.  
37 364 31. Sirikantaramas S, Yamazaki M and Saito K. Mutations in topoisomerase I as a self-resistance  
38 365 mechanism coevolved with the production of the anticancer alkaloid camptothecin in plants.  
39 366 *Proc Natl Acad Sci U S A*. 2008;105 18:6782-6. doi:0801038105 [pii]10.1073/pnas.0801038105.  
40 367 32. Hanada K, Zou C, Lehti-Shiu MD, Shinozaki K and Shiu SH. Importance of lineage-specific  
41 368 expansion of plant tandem duplicates in the adaptive response to environmental stimuli. *Plant*  
42 369 *Physiol*. 2008;148 2:993-1003.  
43 370 33. Emms DM and Kelly S. OrthoFinder: solving fundamental biases in whole genome comparisons  
44 371 dramatically improves orthogroup inference accuracy. *Genome Biol*. 2015;16:157.  
45 372 doi:10.1186/s13059-015-0721-2.  
46 373 34. Nutzmann HW and Osbourn A. Gene clustering in plant specialized metabolism. *Curr Opin*  
47 374 *Biotechnol*. 2014;26:91-9. doi:10.1016/j.copbio.2013.10.009.  
48 375 35. Kellner F, Kim J, Clavijo BJ, Hamilton JP, Childs KL, Vaillancourt B, et al. Genome-guided  
49 376 investigation of plant natural product biosynthesis. *Plant J*. 2015;82 4:680-92.  
50 377 doi:10.1111/tpj.12827.

1  
2  
3  
4  
5  
6  
7  
8  
9  
10  
11  
12  
13  
14  
15  
16  
17  
18  
19  
20  
21  
22  
23  
24  
25  
26  
27  
28  
29  
30  
31  
32  
33  
34  
35  
36  
37  
38  
39  
40  
41  
42  
43  
44  
45  
46  
47  
48  
49  
50  
51  
52  
53  
54  
55  
56  
57  
58  
59  
60  
61  
62  
63  
64  
65

378 36. Itkin M, Heinig U, Tzfadia O, Bhide AJ, Shinde B, Cardenas PD, et al. Biosynthesis of  
379 antinutritional alkaloids in solanaceous crops is mediated by clustered genes. *Science*. 2013;341  
380 6142:175-9. doi:10.1126/science.1240230.

381 37. Sadre R, Magallanes-Lundback M, Pradhan S, Salim V, Mesberg A, Jones AD, et al. Metabolite  
382 Diversity in Alkaloid Biosynthesis: A Multilane (Diastereomer) Highway for Camptothecin  
383 Synthesis in *Camptotheca acuminata*. *Plant Cell*. 2016;28 8:1926-44. doi:10.1105/tpc.16.00193.

384 38. DellaPenna D and O'Connor SE. Plant science. Plant gene clusters and opiates. *Science*. 2012;336  
385 6089:1648-9. doi:10.1126/science.1225473.

386 39. Chae L, Kim T, Nilo-Poyanco R and Rhee SY. Genomic signatures of specialized metabolism in  
387 plants. *Science*. 2014;344 6183:510-3. doi:10.1126/science.1252076.

388 40. Kliebenstein DJ. A role for gene duplication and natural variation of gene expression in the  
389 evolution of metabolism. *PLoS One*. 2008;3 3:e1838. doi:10.1371/journal.pone.0001838.

390 41. Kliebenstein DJ, Lambrix VM, Reichelt M, Gershenzon J and Mitchell-Olds T. Gene duplication in  
391 the diversification of secondary metabolism: tandem 2-oxoglutarate-dependent dioxygenases  
392 control glucosinolate biosynthesis in *Arabidopsis*. *Plant Cell*. 2001;13 3:681-93.

393 42. The Medicinal Plant Genomics Resource. <http://medicinalplantgenomics.msu.edu/>. Accessed 26  
394 March 2017.

395

396

1  
2  
3  
4  
5  
6  
7  
8  
9  
10  
11  
12  
13  
14  
15  
16  
17  
18  
19  
20  
21  
22  
23  
24  
25  
26  
27  
28  
29  
30  
31  
32  
33  
34  
35  
36  
37  
38  
39  
40  
41  
42  
43  
44  
45  
46  
47  
48  
49  
50  
51  
52  
53  
54  
55  
56  
57  
58  
59  
60  
61  
62  
63  
64  
65

397 **Additional files**

398 **Supplemental tables:**

399 **Table S1. RNA-sequencing libraries used in this study.**

| BioProject ID | BioSample ID | Tissue         | No. cleaned |                 |
|---------------|--------------|----------------|-------------|-----------------|
|               |              |                | reads       | Estimated bases |
| PRJNA80029    | SAMN00255206 | mature leaf    | 90,862,580  | 5,451,754,800   |
| PRJNA80029    | SAMN00255207 | immature bark  | 84,537,958  | 5,072,277,480   |
| PRJNA80029    | SAMN00255208 | root           | 88,940,668  | 5,336,440,080   |
| PRJNA80029    | SAMN00255215 | young flower   | 71,435,806  | 4,286,148,360   |
| PRJNA80029    | SAMN00255216 | immature fruit | 84,250,338  | 5,055,020,280   |
| PRJNA80029    | SAMN00255217 | mature fruit   | 47,811,342  | 2,868,680,520   |
| PRJNA80029    | SAMN00255222 | cotyledons     | 74,037,722  | 4,442,263,320   |
| PRJNA80029    | SAMN00255223 | upper stem     | 76,105,786  | 4,566,347,160   |
| PRJNA80029    | SAMN00255224 | lower stem     | 72,680,940  | 4,360,856,400   |
| PRJNA361128   | SAMN06229771 | root           | 55,435,804  | 7,224,198,331   |
| Total         |              |                | 771,909,254 | 49,309,244,481  |

400

401 **Table S2. Orthologous groups of genes from *Camptotheca acuminata* and five other plant**  
402 **species.**

403 This is available as a separate XLS file

404

1  
2  
3  
4  
5  
6  
7  
8  
9  
10  
11  
12  
13  
14  
15  
16  
17  
18  
19  
20  
21  
22  
23  
24  
25  
26  
27  
28  
29  
30  
31  
32  
33  
34  
35  
36  
37  
38  
39  
40  
41  
42  
43  
44  
45  
46  
47  
48  
49  
50  
51  
52  
53  
54  
55  
56  
57  
58  
59  
60  
61  
62  
63  
64  
65

405 **Table S3. P450 paralogous genes in *Camptotheca acuminata*.**

406 This is available as a separate XLS file

407 **Table S4. Expression abundance matrix (fragments per kbp exon model per million mapped**  
408 **reads) from different tissues of *Camptotheca acuminata*.**

409 This is available as a separate XLS file

410

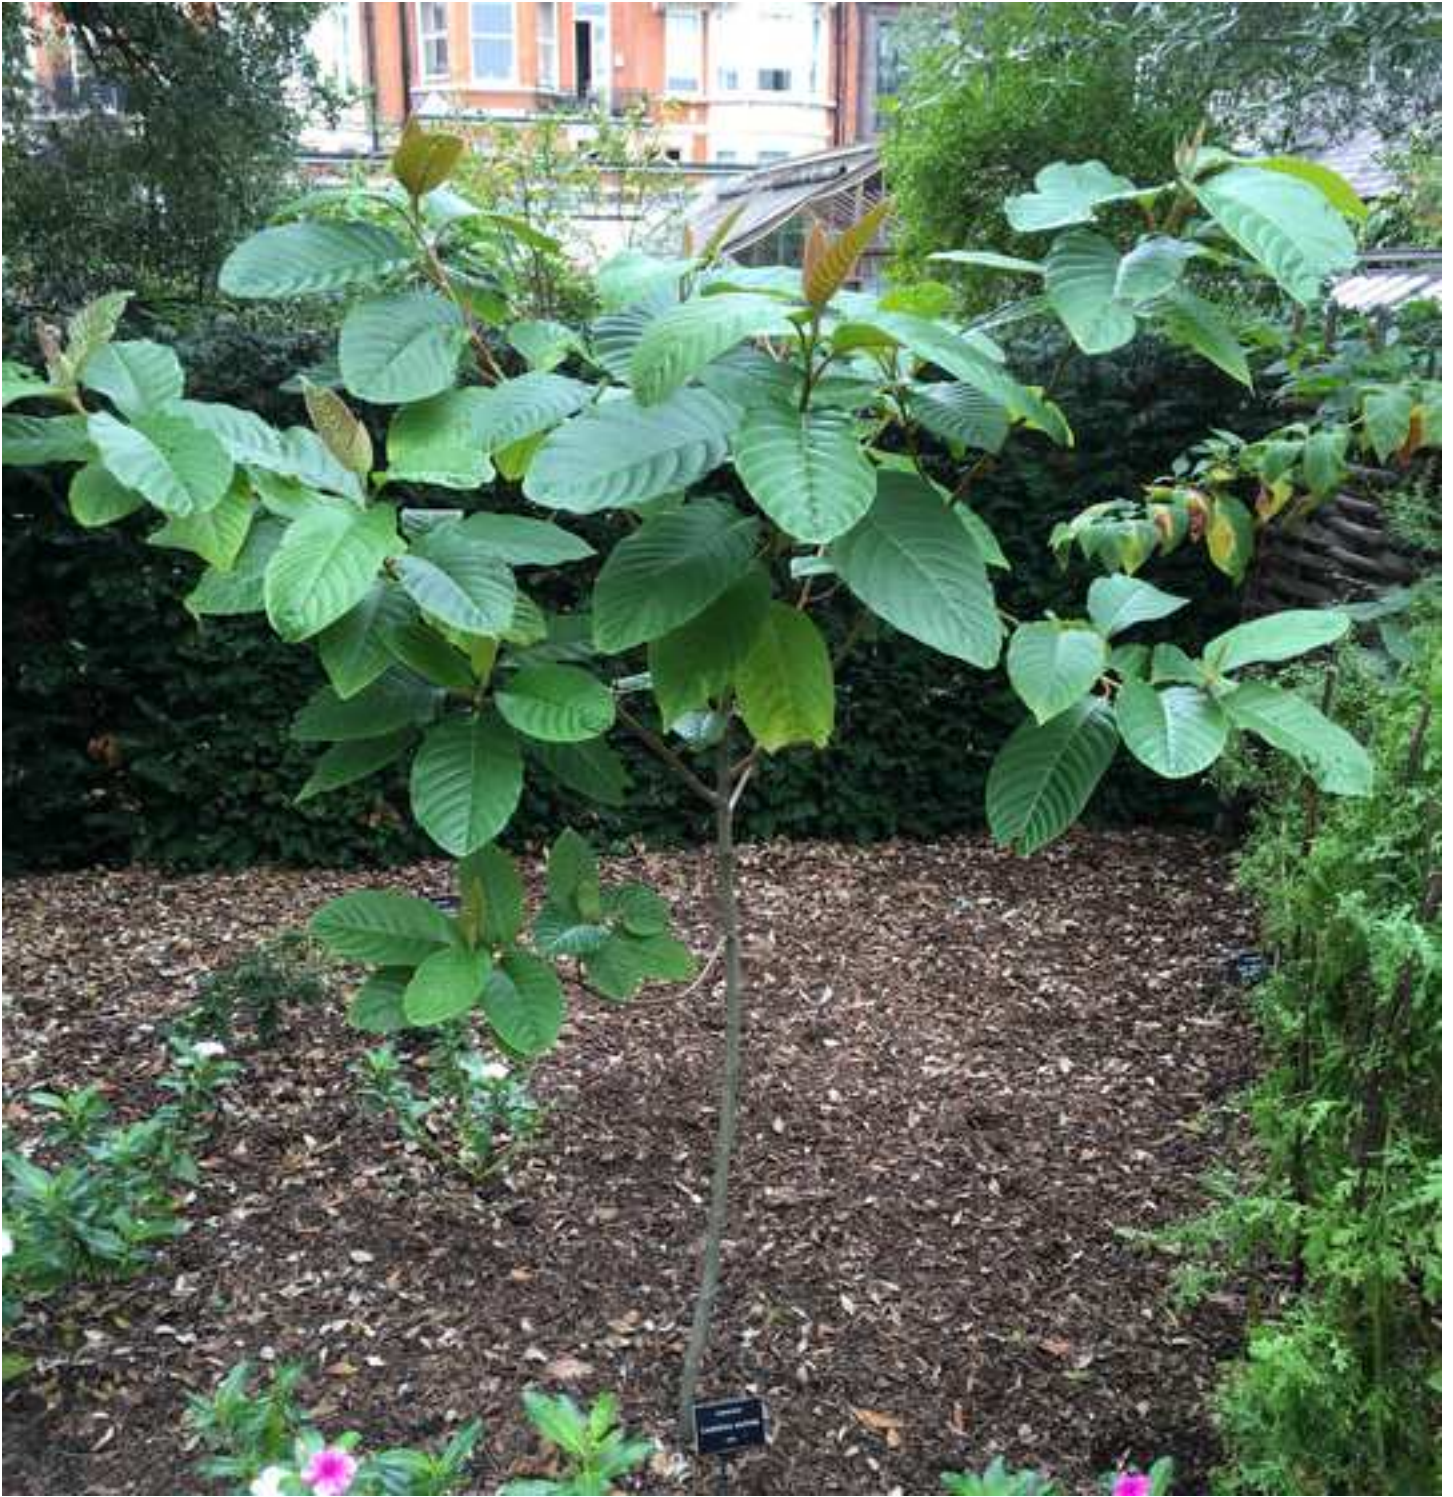



Figure 2

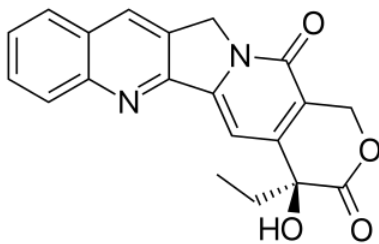

B

|                                   |                                                                                                                                                                                                                                                                                                                                         |
|-----------------------------------|-----------------------------------------------------------------------------------------------------------------------------------------------------------------------------------------------------------------------------------------------------------------------------------------------------------------------------------------|
| Homo sapiens AAA61207             | <b>F</b> RG <b>R</b> GN <b>H</b> PK <b>M</b> GM <b>L</b> KRR <b>I</b> MP <b>E</b> DI <b>I</b> NC <b>S</b> DK <b>A</b> K <b>V</b> SP <b>P</b> P-G <b>H</b> K <b>W</b> KE <b>V</b> R <b>H</b> DN <b>K</b> V <b>T</b> W <b>L</b> SV <b>T</b> EN <b>I</b> Q <b>S</b> -S 423                                                                 |
| Camptotheca acuminata BAG31376    | <b>F</b> RG <b>R</b> GE <b>H</b> PK <b>M</b> GM <b>L</b> K <b>K</b> C <b>I</b> R <b>F</b> SD <b>I</b> T <b>I</b> N <b>I</b> G <b>K</b> DA <b>P</b> IE <b>C</b> PI <b>P</b> GES <b>W</b> KE <b>I</b> R <b>H</b> DN <b>T</b> V <b>T</b> W <b>L</b> AF <b>W</b> ND <b>P</b> IK <b>P</b> RE 556                                             |
| Camptotheca acuminata Cac_g012488 | <b>F</b> RG <b>R</b> GE <b>H</b> PK <b>M</b> GM <b>L</b> K <b>K</b> C <b>I</b> R <b>F</b> SD <b>I</b> T <b>I</b> N <b>I</b> G <b>K</b> DA <b>P</b> IE <b>C</b> PI <b>P</b> GES <b>W</b> KE <b>I</b> R <b>H</b> DN <b>T</b> V <b>T</b> W <b>L</b> AF <b>W</b> ND <b>P</b> IK <b>P</b> RE 555                                             |
| Camptotheca acuminata Cac_g021767 | <b>F</b> RG <b>R</b> GE <b>H</b> PK <b>M</b> GM <b>L</b> K <b>L</b> I <b>R</b> SP <b>D</b> I <b>T</b> I <b>N</b> I <b>G</b> K <b>D</b> A <b>P</b> IE <b>C</b> PI <b>P</b> GES <b>W</b> KE <b>I</b> R <b>H</b> DN <b>T</b> V <b>T</b> W <b>L</b> AF <b>W</b> ND <b>P</b> IN <b>P</b> RE 560                                              |
| Ophiorrhiza pumila BAG31373       | <b>F</b> RG <b>R</b> GE <b>H</b> PK <b>V</b> GM <b>L</b> K <b>K</b> R <b>I</b> R <b>P</b> RD <b>I</b> T <b>I</b> N <b>I</b> G <b>K</b> DA <b>P</b> IE <b>C</b> PI <b>P</b> GER <b>W</b> KE <b>V</b> R <b>ND</b> NT <b>V</b> W <b>L</b> AY <b>W</b> ND <b>P</b> V <b>N</b> L <b>K</b> E 587                                              |
| Ophiorrhiza liukuensis BAG31374   | <b>F</b> RG <b>R</b> GE <b>H</b> PK <b>M</b> GM <b>L</b> K <b>K</b> R <b>I</b> R <b>P</b> RD <b>I</b> T <b>I</b> N <b>I</b> G <b>K</b> DA <b>P</b> IE <b>C</b> PI <b>P</b> GER <b>W</b> KE <b>V</b> R <b>ND</b> NT <b>V</b> W <b>L</b> AF <b>W</b> ND <b>P</b> IN <b>Q</b> K <b>E</b> 587                                               |
| Ophiorrhiza japonica BAG31375     | <b>F</b> RG <b>R</b> GE <b>H</b> PK <b>M</b> GM <b>L</b> K <b>K</b> R <b>I</b> R <b>P</b> RD <b>I</b> T <b>I</b> N <b>I</b> G <b>K</b> DA <b>P</b> IE <b>C</b> PI <b>P</b> GER <b>W</b> KE <b>V</b> R <b>ND</b> NT <b>V</b> W <b>L</b> AF <b>W</b> ID <b>P</b> IN <b>Q</b> K <b>E</b> 588                                               |
| Catharanthus roseus BAG31377      | <b>F</b> RG <b>R</b> GE <b>H</b> PK <b>M</b> GM <b>L</b> K <b>K</b> R <b>I</b> R <b>P</b> CD <b>I</b> T <b>I</b> N <b>I</b> G <b>K</b> DA <b>P</b> IE <b>C</b> VP <b>P</b> GER <b>W</b> KE <b>V</b> R <b>H</b> DN <b>T</b> V <b>T</b> W <b>L</b> AF <b>W</b> ND <b>P</b> IN <b>P</b> K <b>E</b> 570                                     |
| Arabidopsis thaliana NP_200341    | <b>F</b> RG <b>R</b> GE <b>H</b> PK <b>M</b> GM <b>L</b> K <b>K</b> R <b>I</b> HP <b>E</b> IT <b>L</b> N <b>I</b> G <b>K</b> DA <b>P</b> IE <b>C</b> PI <b>A</b> GER <b>W</b> KE <b>V</b> R <b>H</b> DN <b>T</b> V <b>T</b> W <b>L</b> AF <b>W</b> AD <b>P</b> IN <b>P</b> K <b>E</b> 575                                               |
| Saccharomyces cerevisiae AAA35162 | <b>F</b> X <b>G</b> R <b>G</b> A <b>H</b> P <b>T</b> G <b>K</b> L <b>K</b> R <b>R</b> V <b>N</b> P <b>E</b> D <b>I</b> V <b>L</b> N <b>L</b> S <b>K</b> D <b>A</b> P <b>V</b> P <b>A</b> P <b>E</b> -G <b>H</b> K <b>W</b> GE <b>I</b> R <b>H</b> DN <b>T</b> V <b>Q</b> W <b>L</b> A <b>M</b> W <b>R</b> EN <b>F</b> N <b>S</b> -S 355 |

Direct/indirect camptothecin binding

|                                   |                                                                                                                                                                                                                                                                                       |
|-----------------------------------|---------------------------------------------------------------------------------------------------------------------------------------------------------------------------------------------------------------------------------------------------------------------------------------|
| Homo sapiens AAA61207             | <b>E</b> SK <b>K</b> K <b>A</b> V <b>Q</b> R <b>L</b> E <b>E</b> Q <b>L</b> M <b>K</b> L <b>E</b> V <b>Q</b> AT <b>D</b> R <b>E</b> N <b>K</b> Q <b>I</b> A <b>L</b> G <b>T</b> S <b>K</b> I <b>N</b> Y <b>L</b> D <b>P</b> R <b>I</b> T <b>V</b> A <b>W</b> C <b>K</b> 734           |
| Camptotheca acuminata BAG31376    | <b>E</b> AL <b>E</b> R <b>K</b> I <b>G</b> Q <b>T</b> NA <b>K</b> I <b>E</b> K <b>M</b> ER <b>D</b> K <b>E</b> T <b>K</b> E <b>G</b> L <b>K</b> T <b>I</b> A <b>L</b> G <b>T</b> S <b>K</b> I <b>S</b> Y <b>L</b> D <b>P</b> R <b>I</b> T <b>V</b> A <b>W</b> C <b>K</b> 864          |
| Camptotheca acuminata Cac_g012488 | <b>E</b> AL <b>E</b> R <b>K</b> I <b>G</b> Q <b>T</b> NA <b>K</b> I <b>E</b> K <b>M</b> ER <b>D</b> K <b>E</b> T <b>K</b> E <b>G</b> L <b>K</b> T <b>I</b> A <b>L</b> G <b>T</b> S <b>K</b> I <b>S</b> Y <b>L</b> D <b>P</b> R <b>I</b> T <b>V</b> A <b>W</b> C <b>K</b> 863          |
| Camptotheca acuminata Cac_g021767 | <b>E</b> AL <b>G</b> R <b>K</b> I <b>A</b> Q <b>T</b> SA <b>K</b> I <b>E</b> K <b>M</b> ER <b>D</b> K <b>A</b> T <b>K</b> E <b>G</b> L <b>K</b> T <b>V</b> A <b>L</b> S <b>T</b> S <b>K</b> I <b>S</b> Y <b>L</b> D <b>P</b> R <b>I</b> T <b>V</b> A <b>W</b> C <b>K</b> 868          |
| Ophiorrhiza pumila BAG31373       | <b>E</b> AL <b>E</b> R <b>K</b> I <b>A</b> Q <b>T</b> NA <b>K</b> I <b>E</b> K <b>M</b> ER <b>D</b> K <b>K</b> T <b>K</b> E <b>D</b> L <b>K</b> A <b>V</b> A <b>L</b> S <b>T</b> S <b>K</b> I <b>S</b> Y <b>L</b> D <b>P</b> R <b>I</b> T <b>V</b> A <b>W</b> C <b>K</b> 896          |
| Ophiorrhiza liukuensis BAG31374   | <b>E</b> S <b>L</b> E <b>R</b> K <b>I</b> A <b>Q</b> T <b>N</b> A <b>K</b> I <b>E</b> K <b>M</b> ER <b>D</b> K <b>K</b> T <b>K</b> E <b>D</b> L <b>K</b> A <b>V</b> A <b>L</b> S <b>T</b> S <b>K</b> I <b>S</b> Y <b>L</b> D <b>P</b> R <b>I</b> T <b>V</b> A <b>W</b> C <b>K</b> 896 |
| Ophiorrhiza japonica BAG31375     | <b>E</b> AL <b>E</b> R <b>K</b> MA <b>I</b> NA <b>K</b> I <b>E</b> K <b>M</b> ER <b>D</b> K <b>E</b> T <b>K</b> E <b>D</b> L <b>K</b> T <b>V</b> A <b>L</b> G <b>T</b> S <b>K</b> I <b>N</b> Y <b>L</b> D <b>P</b> R <b>I</b> T <b>V</b> A <b>W</b> C <b>K</b> 897                    |
| Catharanthus roseus BAG31377      | <b>E</b> S <b>L</b> E <b>K</b> K <b>I</b> A <b>Q</b> T <b>N</b> A <b>K</b> I <b>E</b> K <b>M</b> ER <b>D</b> K <b>E</b> T <b>K</b> E <b>D</b> L <b>K</b> T <b>V</b> A <b>L</b> G <b>T</b> S <b>K</b> I <b>N</b> Y <b>L</b> D <b>P</b> R <b>I</b> T <b>V</b> A <b>W</b> C <b>K</b> 880 |
| Arabidopsis thaliana NP_200341    | <b>N</b> A <b>W</b> E <b>K</b> I <b>A</b> Q <b>Q</b> S <b>A</b> K <b>I</b> E <b>K</b> M <b>E</b> R <b>D</b> M <b>H</b> T <b>K</b> E <b>D</b> L <b>K</b> T <b>V</b> A <b>L</b> G <b>T</b> S <b>K</b> I <b>N</b> Y <b>L</b> D <b>P</b> R <b>I</b> T <b>V</b> A <b>W</b> C <b>K</b> 883  |
| Saccharomyces cerevisiae AAA35162 | <b>E</b> K <b>I</b> A <b>Q</b> V <b>E</b> K <b>L</b> Q <b>R</b> I <b>Q</b> T <b>S</b> S <b>I</b> Q <b>L</b> K <b>D</b> K <b>E</b> EN <b>S</b> Q <b>V</b> S <b>L</b> G <b>T</b> S <b>K</b> I <b>N</b> Y <b>I</b> D <b>P</b> R <b>L</b> S <b>V</b> P <b>F</b> C <b>K</b> 738            |

Direct/indirect camptothecin binding

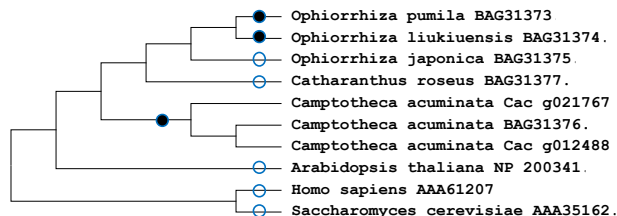

camptothecin

● present

○ absent

Figure 3

[Click here to download Figure Fig\\_3.pptx](#)

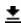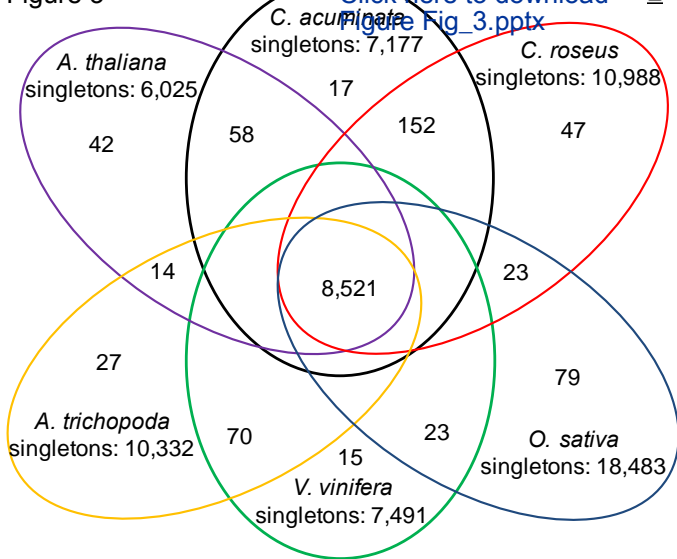

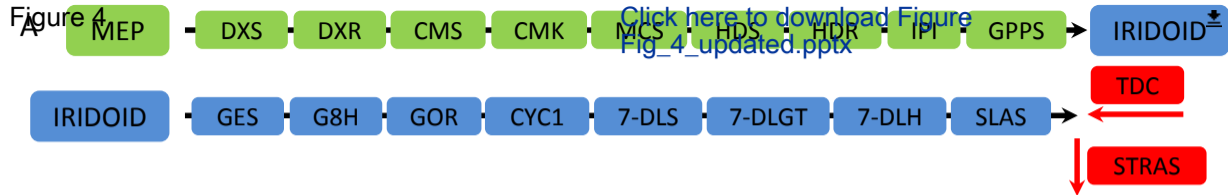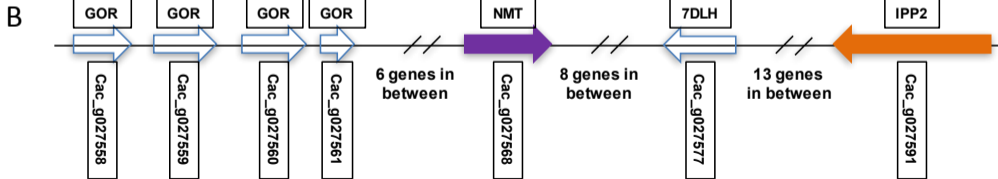

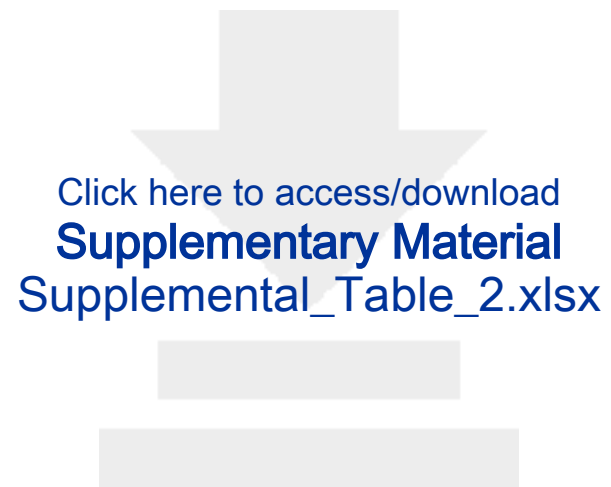

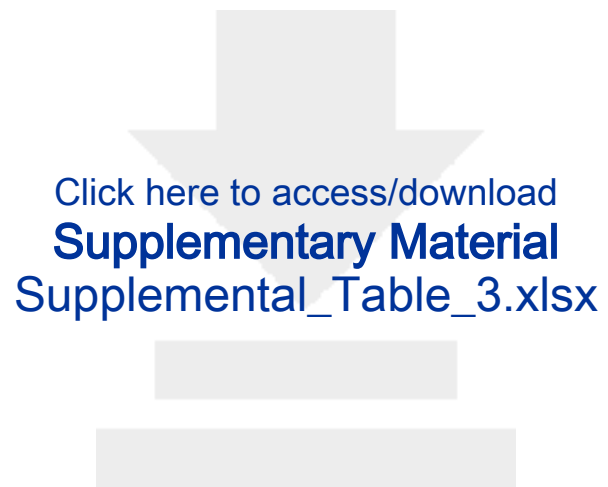

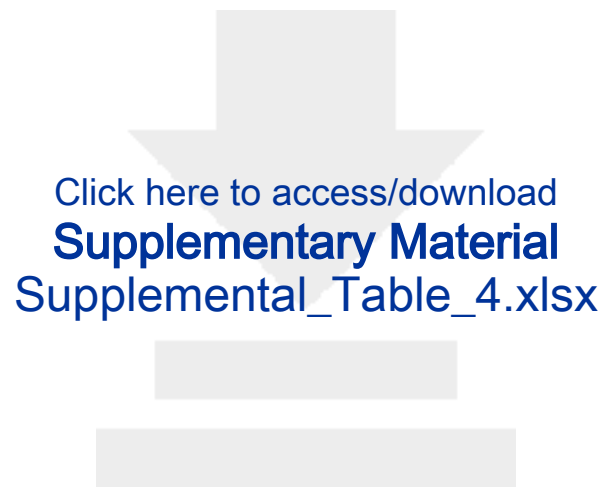

Supplement: gix065_giga-d-17-00067_revision-1.pdf [file gix065_giga-d-17-00067_revision-1.pdf]
