# Supplementary material for: De novo genome assembly of Camptotheca acuminata, a natural source of the anti-cancer compound camptothecin
Source: PubMed Central journal article supplement (PMC5737489; doi:10.1093/gigascience/gix065), 2017-07-24

1  
2  
3  
4  
5  
6  
7  
8  
9  
10  
11  
12  
13  
14  
15  
16  
17  
18  
19  
20  
21  
22  
23  
24  
25  
26  
27  
28  
29  
30  
31  
32  
33  
34  
35  
36  
37  
38  
39  
40  
41  
42  
43  
44  
45  
46  
47  
48  
49  
50  
51  
52  
53  
54  
55  
56  
57  
58  
59  
60  
61  
62  
63  
64  
65

1 ***De novo* genome assembly of *Camptotheca acuminata*, a natural source of the anti-cancer**  
2 **compound camptothecin**

3 Dongyan Zhao<sup>1</sup>, John P. Hamilton<sup>1</sup>, Gina M. Pham<sup>1</sup>, Emily Crisovan<sup>1</sup>, Krystle Wiegert-Rininger<sup>1</sup>,  
4 Brieanne Vaillancourt<sup>1</sup>, Dean DellaPenna<sup>2</sup>, and C. Robin Buell<sup>1\*</sup>

5 <sup>1</sup>Department of Plant Biology, Michigan State University, East Lansing, MI 48824 USA

6 <sup>2</sup>Department of Biochemistry & Molecular Biology, Michigan State University, East Lansing, MI  
7 48824 USA

8 **Email addresses:** Dongyan Zhao <zhaodon4@msu.edu>, John P. Hamilton <jham@msu.edu>,  
9 Gina M. Pham <phamgina@msu.edu>, Emily Crisovan <pankeyem@msu.edu>, Krystle Wiegert-  
10 Rininger <wiegertk@msu.edu>, Brieanne Vaillancourt <vaillan6@msu.edu>, Dean Dellapenna  
11 <dellapen@msu.edu>, C Robin Buell <buell@msu.edu>

12 \*Correspondence should be addressed to: C. Robin Buell, buell@msu.edu

13

14 **Manuscript type:** Data note

15

1  
2  
3  
4 16 **Abstract**

5  
6  
7 17 **Background:** *Camptotheca acuminata* is one of a limited number of species that produce  
8  
9  
10 18 camptothecin, a pentacyclic quinoline alkaloid with anti-cancer activity due to its ability to  
11  
12  
13 19 inhibit DNA topoisomerase. While transcriptome studies have been performed previously with  
14  
15  
16 20 various camptothecin-producing species, no genome sequence for a camptothecin-producing  
17  
18 21 species is available to date.

19  
20  
21 22 **Findings:** We generated a high quality *de novo* genome assembly for *C. acuminata* representing  
22  
23 23 403,174,860 bp on 1,394 scaffolds with an N50 scaffold size of 1,752 kbp. Quality assessments  
24  
25  
26 24 of the assembly revealed robust representation of the genome sequence including genic  
27  
28  
29 25 regions. Using a novel genome annotation method, we annotated 31,825 genes encoding  
30  
31  
32 26 40,332 gene models. Based on sequence identity and orthology with validated genes from  
33  
34  
35 27 *Catharanthus roseus* as well as Pfam searches, we identified candidate orthologs for genes  
36  
37 28 potentially involved in camptothecin biosynthesis. Extensive gene duplication including tandem  
38  
39  
40 29 duplication was widespread in the *C. acuminata* genome with 2,571 genes belonging to 997  
41  
42 30 tandem duplicated gene clusters.

43  
44  
45 31 **Conclusions:** To our knowledge, this is the first genome sequence for a camptothecin-producing  
46  
47  
48 32 species, and access to the *C. acuminata* genome will permit not only discovery of genes  
49  
50  
51 33 encoding the camptothecin biosynthetic pathway but also reagents that can be used for  
52  
53  
54 34 heterologous expression of camptothecin and camptothecin analogs with novel pharmaceutical  
55  
56 35 applications.

57  
58  
59  
60  
61  
62  
63  
64  
65

1  
2  
3  
4  
5  
6  
7  
8  
9  
10  
11  
12  
13  
14  
15  
16  
17  
18  
19  
20  
21  
22  
23  
24  
25  
26  
27  
28  
29  
30  
31  
32  
33  
34  
35  
36  
37  
38  
39  
40  
41  
42  
43  
44  
45  
46  
47  
48  
49  
50  
51  
52  
53  
54  
55  
56  
57  
58  
59  
60  
61  
62  
63  
64  
65

36 **Keywords:** *Camptotheca acuminata*, camptothecin, genome assembly, genome annotation,  
37 tandem duplications

38

39 **Data Description**

40 **Background information on camptothecin, a key anti-cancer natural product**

41 *Camptotheca acuminata* Decne, also known as the Chinese Happy Tree (Figure 1), is an eudicot  
42 asterid Cornales tropical tree species within the Nyssaceae family [1] that also contains *Nyssa*  
43 spp (tupelo) and *Davidia involucrate* (dove tree); no genome sequence is available for any  
44 member of this family. *C. acuminata* is one of a limited number of plant species that produce  
45 camptothecin, a pentacyclic quinoline alkaloid (Figure 2A) with anti-cancer activity due to its  
46 ability to inhibit DNA topoisomerase [2]. Due to poor solubility, derivatives such as irinotecan  
47 and topotecan, rather than camptothecin are currently in use as approved cancer drugs. The  
48 significance of these derivatives as therapeutics is highlighted by the listing of irinotecan on the  
49 World Health Organization Model List of Essential Medicines [3]. While transcriptome studies  
50 have been performed previously with various camptothecin-producing species including *C.*  
51 *acuminata* and *Ophiorrhiza pumila* (e.g., [4-6]), no genome sequence for a camptothecin-  
52 producing species is available to date. We report on the assembly and annotation of the *C.*  
53 *acuminata* genome, the characterization of genes implicated in camptothecin biosynthesis, and  
54 highlight the extent of gene duplication that provides new templates for gene diversification.

55

1  
2  
3  
4 **56 RNA isolation, library construction, sequencing, and transcriptome assembly**

5  
6  
7  
8 57 Transcriptome assemblies were constructed using nine developmental RNA-sequencing (RNA-  
9  
10 58 seq) datasets described in a previous study [4] that included immature bark, cotyledons,  
11  
12  
13 59 immature flower, immature fruit, mature fruit, mature leaf, root, upper stem, and lower stem.  
14  
15 60 Adapters and low-quality nucleotides were removed from the RNA-seq reads using Cutadapt  
16  
17  
18 61 v1.8 (Cutadapt , RRID:SCR\_011841) [7] and contaminating ribosomal RNA reads were removed.  
19  
20  
21 62 Cleaned reads from all nine libraries were assembled using Trinity v20140717 (Trinity ,  
22  
23 63 RRID:SCR\_013048) [8] with a normalization factor of 50x using default parameters. Contaminant  
24  
25  
26 64 transcripts (5,669 total) were identified by searching the *de novo* transcriptome assembly  
27  
28  
29 65 against the National Center for Biotechnology Information (NCBI) non-redundant nucleotide  
30  
31 66 database using BLAST+ (v2.2.30) [9, 10] with an E-value cutoff of 1e-5; transcripts with their  
32  
33  
34 67 best hits being a non-plant sequence were removed from the transcriptome.

35  
36  
37 68 For additional transcript support for use in a genome-guided transcriptome assembly to  
38  
39  
40 69 support genome annotation, strand-specific RNA-seq reads were generated by isolating RNA  
41  
42 70 from root tissues and sequencing of Kappa TruSeq Stranded libraries on an Illumina HiSeq 2500  
43  
44  
45 71 platform generating 150 nt paired-end reads (BioSample ID: SAMN06229771). Root RNA-seq  
46  
47  
48 72 reads were assessed for quality using FASTQC v0.11.2 (FASTQC , RRID:SCR\_014583) [11] using  
49  
50 73 default parameters and cleaned as described above.

51  
52  
53 **74 DNA isolation, library construction, and sequencing**

54  
55  
56  
57 75 The genome size of *C. acuminata* was estimated at 516 Mb using flow cytometry, suitable for  
58  
59  
60 76 *de novo* assembly using the Illumina platform. DNA was extracted from young leaves of *C.*  
61  
62  
63  
64  
65

1  
2  
3  
4 77 *acuminata* at the vegetative growth stage using CTAB [12]. Multiple Illumina-compatible paired-  
5  
6  
7 78 end libraries (Table 1) with insert sizes ranging from 180-609 bp were constructed as described  
8  
9  
10 79 previously [13] and sequenced to 150 nt in paired-end mode on an Illumina HiSeq2000. Mate-  
11  
12 80 pair libraries (Table 1) with size ranges of 1.3-8.9 kb were made using the Nextera Kit (Illumina,  
13  
14  
15 81 San Diego CA) as per manufacturer's instructions and sequenced to 150 nt in paired-end mode  
16  
17 82 on an Illumina HiSeq2000.

### 20 83 **Genome assembly**

24 84 Paired-end reads (Table 1) were assessed for quality using FASTQC v0.11.2 ( FASTQC ,  
25  
26  
27 85 RRID:SCR\_014583) [11] using default parameters, cleaned for adapters and low quality  
28  
29  
30 86 sequences using Cutadapt v1.8 (Cutadapt , RRID:SCR\_011841) [7] and only reads in pairs with each  
31  
32 87 read  $\geq 25$  nt were retained for genome assembly. Mate pair libraries (Table 1) were processed  
33  
34  
35 88 using NextClip v1.3.1 (NextClip , RRID:SCR\_005465) [14] and only reads from Categories A, B, C  
36  
37  
38 89 were used for the assembly. Using ALLPATHS-LG v44837 (ALLPATHS-LG , RRID:SCR\_010742) [15]  
39  
40  
41 90 with default parameters, two paired-end read libraries (180 and 268 bp insert libraries) and all  
42  
43  
44 91 five mate pair libraries (Table 1) were used to generate an initial assembly of 403.2 Mb with an  
45  
46  
47 92 N50 contig size of 108 kbp and an N50 scaffold size of 1,752 kbp (Tables 1 and 2). Gaps (5,076)  
48  
49  
50 93 in this initial assembly were filled using SOAP GapCloser v1.12r6 (GapCloser ,  
51  
52  
53 94 RRID:SCR\_015026) [16] with four independent paired-end libraries (352, 429, 585, and 609 bp  
54  
55  
56 95 inserts, Table 1); 12,468,362 bp of the estimated 16,471,841 bp of gaps was filled leaving a total  
57  
58  
59 96 of 3,825 gaps (3,772,191 Ns). The assembly was checked for contaminant sequences based on  
60  
61  
62 97 alignments to the NCBI non-redundant nucleotide database using BLASTN (E-value =  $1e-5$ ) [10];  
63  
64  
65

1  
2  
3  
4  
5  
6  
7  
8  
9  
10  
11  
12  
13  
14  
15  
16  
17  
18  
19  
20  
21  
22  
23  
24  
25  
26  
27  
28  
29  
30  
31  
32  
33  
34  
35  
36  
37  
38  
39  
40  
41  
42  
43  
44  
45  
46  
47  
48  
49  
50  
51  
52  
53  
54  
55  
56  
57  
58  
59  
60  
61  
62  
63  
64  
65

98 a single scaffold of 5,156 bp that matched a bacterium sequence with 100% coverage and 100%  
99 identity was removed. Subsequently, five scaffolds less than 1 kbp were removed resulting in  
100 the final assembly of 403,174,860 bp comprised of 1,394 scaffolds with an N50 scaffold size of  
101 1,752 kbp (Tables 1 and 2) and 0.9% Ns.

102 Quality assessments revealed a robust high quality assembly with 98% of the paired-end  
103 genomic sequencing reads aligning to the assembly, of which, 99.97% aligned concordantly.  
104 With respect to genic representation, 95.3% of RNA-seq-derived transcript assemblies [4] and  
105 74,119 of 74,682 (99%) pyrosequencing transcript reads from a separate study [5] aligned to  
106 the genome assembly. A total of 93.6% of conserved Embryophyta BUSCO (BUSCO ,  
107 RRID:SCR\_015008) proteins were present in the assembly as full-length sequences with an  
108 additional 2.5% of the Embryophyta proteins fragmented [17].

109 **Genome annotation**

110 We used a novel genome annotation method to generate high quality annotation of the *C.*  
111 *acuminata* genome in which we repeat masked the genome, trained an *ab initio* gene finder  
112 with a genome-guided transcript assembly, and then refined the gene models using additional  
113 genome-guided transcript assembly evidence to generate a high quality gene model set. We  
114 first created a *C. acuminata* specific custom repeat library (CRL) using MITE-Hunter v2011 [18]  
115 and RepeatModeler v1.0.8 (RepeatModeler , RRID:SCR\_015027) [19]. Protein coding genes  
116 were removed from each repeat library using ProtExcluder.pl v1.1 [20] and combined into a  
117 single CRL, which hard-masked 143.6 Mb (35.6%) of the assembly as repetitive sequence using  
118 RepeatMasker v4.0.6 (RepeatMasker , RRID:SCR\_012954) [21]. Cleaned root RNA-seq reads

1  
2  
3  
4 119 (Table S1, BioSample ID: SAMN06229771) were aligned to the genome assembly using TopHat2  
5  
6  
7 120 v2.0.13 (TopHat , RRID:SCR\_013035) [22] in strand-specific mode with a minimum intron length of  
8  
9  
10 121 20 bp and a maximum intron length of 20 kb; the alignments were then used to create a  
11  
12 122 genome-guided transcriptome assembly using Trinity v2.2.0 (Trinity , RRID:SCR\_013048) [23]. The  
13  
14  
15 123 RNA-seq alignments were used to train AUGUSTUS v3.1 (Augustus: Gene Prediction ,  
16  
17 124 RRID:SCR\_008417) [24] and gene predictions were generated with AUGUSTUS [25] using the  
18  
19  
20 125 hard-masked assembly. Gene model structures were refined by incorporating evidence from  
21  
22 126 the genome-guided transcriptome assembly using PASA2 v2.0.2 (PASA , RRID:SCR\_014656) [26,  
23  
24  
25 127 27]; with the parameters: MIN\_PERCENT\_ALIGNED=90, MIN\_AVG\_PER\_ID=99. After annotation  
26  
27  
28 128 comparison, models that PASA identified as being merged and a subset of candidate  
29  
30 129 camptothecin biosynthetic pathways genes identified as mis-annotated were manually curated.  
31  
32  
33 130 The final high-confidence gene model set consists of 31,825 genes encoding 40,332 gene  
34  
35 131 models. Functional annotation was assigned using a custom pipeline using WU-BLASTP [28]  
36  
37  
38 132 searches against the *Arabidopsis thaliana* annotation (TAIR10; [29]) and Swiss-Prot plant  
39  
40  
41 133 proteins (downloaded on 08-17-2015), and a search against Pfam (v29) using HMMER v3.1b2  
42  
43 134 (Hmmer, RRID:SCR\_005305) [30]. This resulted in 34,143 gene models assigned a putative  
44  
45  
46 135 function, 2,011 annotated as conserved hypothetical, and 4,178 annotated as hypothetical.  
47  
48  
49 136 *C. acuminata* is insensitive to camptothecin due to mutations within its own DNA  
50  
51  
52 137 topoisomerase [31] and we identified two topoisomerase genes in our annotated gene set, one  
53  
54 138 of which matches the published *C. acuminata* topoisomerase (99.78% identity, 100% coverage)  
55  
56  
57 139 and includes the two mutations that confer resistance to camptothecin (Figure 2B), one  
58  
59  
60 140 mutation is specific in *C. acuminata* and the other is present in both *C. acuminata* and two  
61  
62  
63  
64  
65

1  
2  
3  
4 141 camptothecin-producing *Ophiorrhiza* species. Further quality assessments of our annotation  
5  
6  
7 142 with 35 nuclear-encoded *C. acuminata* genes available from GenBank revealed an average  
8  
9  
10 143 identity of 99.5% with 100% coverage in our annotated proteome while a single gene encoding  
11  
12 144 1-deoxy-D-xylulose 5-phosphate reductoisomerase (ABC86579.1) had 88.2% identity with 100%  
13  
14  
15 145 coverage that may be attributable to differences in genotypes. One mRNA reported to encode a  
16  
17 146 putative strictosidine beta-D-glucosidase (AES93119.1) was found to have a retained intron that  
18  
19  
20 147 when removed, aligned with 99.3% identity yet reduced coverage (66%) as it was located at the  
21  
22  
23 148 end of a short scaffold. Collectively, the concordant alignment of whole genome shotgun  
24  
25 149 sequence reads to the assembly, the high representation of genic regions as assessed by  
26  
27  
28 150 independent transcriptome datasets (RNA-seq and pyrosequencing) as well as the core  
29  
30 151 Embryophyta BUSCO proteins, when coupled with the high quality gene models as revealed  
31  
32  
33 152 through alignments with cloned *C. acuminata* genes indicate that we have not only generated a  
34  
35 153 high quality genome assembly for *C. acuminata* but also a robust set of annotated gene models.

#### 38 39 154 **Gene duplication and orthology analyses**

40  
41  
42 155 During our annotation efforts, it was readily apparent that there was substantial gene  
43  
44  
45 156 duplication including tandem gene duplication in the *C. acuminata* genome. Paralogous  
46  
47  
48 157 clustering of the *C. acuminata* proteome revealed 5,516 paralogous groups containing 15,806  
49  
50 158 genes. We identified tandem gene duplications in the *C. acuminata* genome based on if: 1) two  
51  
52  
53 159 or more *C. acuminata* genes were present within an orthologous/paralogous group; 2) there  
54  
55 160 were no more than 10 genes in between on a single scaffold; and 3) the pairwise gene distance  
56  
57  
58 161 was less than 100 kbp [32]. Under these criteria, a total of 2,571 genes belonging to 997



1  
2  
3  
4 162 tandem duplicated gene clusters were identified. Gene ontology analysis showed that tandem  
5  
6  
7 163 duplicated genes are significantly enriched in “response to stress” ( $p < 0.0001$ ,  $\chi^2$  test) while  
8  
9  
10 164 under-represented in most other processes, especially “other cellular processes” and “cell  
11  
12 165 organization and biogenesis” ( $p < 0.0001$ ,  $\chi^2$  test).

13  
14  
15 166 To our knowledge, *C. acuminata* is the first species within the Nyssaceae family with a genome  
16  
17  
18 167 sequence. To better understand the evolutionary relationship of *C. acuminata* with other  
19  
20  
21 168 asterids and angiosperms, we identified orthologous and paralogous groups using our  
22  
23 169 annotated *C. acuminata* proteome and the proteomes of three other key species (*Arabidopsis*  
24  
25  
26 170 *thaliana*, *Amborella trichopoda*, and *Catharanthus roseus*) using OrthoFinder (v0.7.1) [33] with  
27  
28  
29 171 default parameters. A total of 12,667 orthologous groups containing at least a single *C.*  
30  
31 172 *acuminata* protein were identified with 9,659 orthologous groups common to all four species  
32  
33  
34 173 (Figure 3; Table S2). Interestingly, *C. acuminata* contains less singleton genes (8,868) than *A.*  
35  
36 174 *trichopoda* and *C. roseus*, and gene ontology analysis demonstrated that these genes were  
37  
38  
39 175 highly enriched in “transport”, “response to stress”, and “other metabolic and biological  
40  
41 176 processes” ( $p < 0.0001$ ,  $\chi^2$  test) while dramatically under-represented in “unknown biological  
42  
43  
44 177 processes” ( $p < 0.0001$ ,  $\chi^2$  test), suggesting these genes may be involved in stress responses and  
45  
46  
47 178 other processes specific to *C. acuminata*.

#### 48 49 50 179 **Uses for the *C. acuminata* genome sequence and annotation**

51  
52  
53 180 Generation of a high-quality genome sequence and annotation dataset for *C. acuminata* will  
54  
55  
56 181 facilitate discovery of genes encoding camptothecin biosynthesis as physical clustering can be  
57  
58  
59 182 combined with sequence similarity and co-expression data to identify candidate genes, an

1  
2  
3  
4 183 approach that has been extremely useful in identifying genes in specialized metabolism in a  
5  
6  
7 184 number of plant species (see [34-36]). In *C. acuminata*, geranylgeranyl diphosphate from the 2-  
8  
9  
10 185 C-methyl-D-erythritol 4-phosphate/1-deoxy-D-xylulose 5-phosphate (MEP) pathway is used to  
11  
12 186 generate secologanic acid via the iridoid pathway and tryptamine from tryptophan  
13  
14  
15 187 decarboxylase are condensed by strictosidinic acid synthase to generate strictosidinic acid that  
16  
17 188 is then converted into camptothecin in the alkaloid pathway via a set of unknown steps [37]  
18  
19  
20 189 (Figure 4A). *Catharanthus roseus*, Madagascar periwinkle, produces vinblastine and vincristine  
21  
22 190 via the MEP and iridoid pathways for which all genes leading to the biosynthesis of the iridoid  
23  
24  
25 191 secologanin have been characterized [35]. Using sequence identity and coverage with  
26  
27 192 characterized *C. roseus* genes from the MEP and iridoid pathway (Figure 4A), we were able to  
28  
29  
30 193 identify candidate genes for all steps in the MEP and iridoid pathway in *C. acuminata* (Table 3).  
31  
32  
33 194 The downstream steps in camptothecin biosynthesis subsequent to formation of strictosidinic  
34  
35 195 acid involve a broad set of enzymes responsible for reduction and oxidation [37] and a total of  
36  
37  
38 196 343 cytochrome P450s (56 paralogous gene clusters and 120 singletons; Table S3) were  
39  
40 197 identified which can serve as candidates for the later steps in camptothecin biosynthesis.  
41  
42  
43  
44 198 Though not absolute, physical clustering of genes involved in specialized metabolism has been  
45  
46 199 observed in a number of species across a number of classes of specialized metabolites [34, 38].  
47  
48  
49 200 With an N50 scaffold size of 1,752 kbp, we observed several instances of physical clustering of  
50  
51 201 genes with homology to genes involved in monoterpene indole alkaloid biosynthesis which may  
52  
53  
54 202 produce related compounds in *C. acuminata*. Using characterized genes involved in the  
55  
56  
57 203 biosynthesis of vinblastine and vincristine from *C. roseus* as queries [35] (Figure 4A, Table 3), we  
58  
59 204 identified a single *C. acuminata* scaffold (907 kbp, 86 genes; Figure 4B) that encoded genes with  
60  
61  
62  
63  
64  
65

1  
2  
3  
4 205 sequence identity to isopentenyl diphosphate isomerase II within the MEP pathway, 8-  
5  
6  
7 206 hydroxygeraniol oxidoreductase (GOR, three complete and one partial paralogs), 7-  
8  
9  
10 207 deoxyloganic acid 7-hydroxylase (7DLH) within the iridoid pathway, and a protein with  
11  
12 208 homology to *C. roseus* 16-hydroxy-2,3-dihydro-3-hydroxytabersonine N-methyltransferase  
13  
14 209 (NMT) within the alkaloid pathway suggesting that access to a high contiguity genome assembly  
15  
16  
17 210 may facilitate discovery of genes involved in specialized metabolism in *C. acuminata*. Tandem  
18  
19  
20 211 duplications of genes involved in specialized metabolism have been reported previously [39, 40]  
21  
22 212 and via divergence either in the coding region or promoter sequence which lead to neo- and  
23  
24  
25 213 sub-functionalization at the enzymatic or expression level, respectively, have been shown to  
26  
27  
28 214 contribute to the extensive chemical diversity within a species [40, 41].  
29  
30

31 215 The *C. acuminata* genome can also be used to facilitate our understanding of the mechanisms  
32  
33  
34 216 by which camptothecin production evolved independently in distinct taxa such as *C. acuminata*  
35  
36 217 (*Nyssaceae*) and *O. pumila* (*Rubiaceae*). For example, a comparative analysis of *C. acuminata*  
37  
38  
39 218 and *O. pumila* may be highly informative in not only delineating genes involved in camptothecin  
40  
41 219 biosynthesis but also in revealing key evolutionary events that led to biosynthesis of this critical  
42  
43  
44 220 natural product across a wide phylogenetic distance. As noted above, camptothecin is  
45  
46  
47 221 cytotoxic and as a consequence, derivatives of camptothecin are used as anti-cancer drugs.  
48  
49 222 Perhaps most exciting, the ability to decipher the full camptothecin biosynthetic pathway will  
50  
51  
52 223 yield molecular reagents that can be used to not only synthesize camptothecin in heterologous  
53  
54 224 systems such as yeast, but also produce less toxic analogs with novel pharmaceutical  
55  
56  
57 225 applications.  
58  
59  
60  
61  
62  
63  
64  
65

226

## 227 **Availability of Supporting Information**

228 Raw genomic sequence reads and transcriptome reads derived from root tissues are available  
229 in the NCBI Sequence Read Archive under project number PRJNA361128. All other RNA-seq  
230 transcriptome reads were from Bioproject PRJNA80029 [4]. The genome assembly and  
231 annotation are available in the Dryad Digital Repository [42] and through the Medicinal Plant  
232 Genomics Resource [43] via a genome browser and search and analysis tools.

## 233 **Abbreviations**

234 2-C-methyl-D-erythritol 4-phosphate/1-deoxy-D-xylulose 5-phosphate (MEP), 7-deoxyloganic  
235 acid 7-hydroxylase (7DLH), 8-hydroxygeraniol oxidoreductase (GOR), 16-hydroxy-2,3-dihydro-3-  
236 hydroxytabersonine N-methyltransferase (NMT), custom repeat library (CRL), National Center  
237 for Biotechnology Information (NCBI), RNA-sequencing (RNA-seq)

## 238 **Competing Interests**

239 The authors have declared that no competing interests exists.

## 240 **Author Contributions**

241 CRB oversaw the project. DZ performed the genome assembly, assisted in genome annotation  
242 and analyzed data. JH annotated the genome and analyzed data. EC, GP, and KWR constructed  
243 libraries and analyzed data. BV analyzed data. DDP provided intellectual oversight. DZ, JH, and  
244 CRB wrote the manuscript.

1  
2  
3  
4  
5  
6  
7  
8  
9  
10  
11  
12  
13  
14  
15  
16  
17  
18  
19  
20  
21  
22  
23  
24  
25  
26  
27  
28  
29  
30  
31  
32  
33  
34  
35  
36  
37  
38  
39  
40  
41  
42  
43  
44  
45  
46  
47  
48  
49  
50  
51  
52  
53  
54  
55  
56  
57  
58  
59  
60  
61  
62  
63  
64  
65

245

246 **Acknowledgements**

247 Funding for this work was provided in part by a grant to CRB and DDP from the National  
248 Institute of General Medical Sciences (1RC2GM092521) and funds to CRB and DDP from  
249 Michigan State University. The funders had no role in study design, data collection and analysis,  
250 decision to publish, or preparation of the manuscript.

1  
2  
3  
4 251 **Figure Legends**

5  
6  
7  
8 252 **Figure 1. *Camptotheca acuminata* Decne, the Chinese Happy Tree, is a member in the**  
9  
10 253 **Nyssaceae family that produces the anticancer compound camptothecin.**

11  
12  
13  
14 254 **Figure 2. Genome aspects of *Camptotheca acuminata*. (A) Structure of camptothecin. (B) Key**  
15  
16 255 **amino acid mutations (red rectangles) in DNA topoisomerase I in camptothecin-producing**  
17  
18  
19 256 **and non-producing species and their phylogenetic relationship.**

20  
21  
22 257 **Figure 3. Venn diagram showing orthologous and paralogous groups between *Amborella***  
23  
24  
25 258 ***trichopoda*, *Arabidopsis thaliana*, *Camptotheca acuminata*, and *Catharanthus roseus*.**

26  
27  
28 259 **Figure 4. Key portions of the proposed camptothecin biosynthetic pathway and an example of**  
29  
30 260 **physical clustering of candidate genes in *Camptotheca acuminata*. (A) The methylerythritol**  
31  
32  
33 261 **phosphate (MEP) pathway (green), iridoid pathway (blue), and condensation of secologanic**  
34  
35  
36 262 **acid with tryptamine via strictosidinic acid synthase (STRAS) to form strictosidinic acid prior**  
37  
38  
39 263 **to downstream dehydration, reduction, and oxidation steps yielding camptothecin. DXS, 1-**  
40  
41 264 **deoxy-D-xylulose 5-phosphate synthase 2; DXR, 1-deoxy-D-xylulose-5-phosphate**  
42  
43  
44 265 **reductoisomerase; CMS, 4-diphosphocytidyl-methylerythritol 2-phosphate synthase; CMK, 4-**  
45  
46  
47 266 **diphosphocytidyl-2-C-methyl-D-erythritol kinase; MCS, 2C-methyl-D-erythritol 2,4-**  
48  
49 267 **cyclodiphosphate synthase; HDS, GCPE protein; HDR, 1-hydroxy-2-methyl-butenyl 4-**  
50  
51  
52 268 **diphosphate reductase; IPI, plastid isopentenyl pyrophosphate, dimethylallyl pyrophosphate**  
53  
54  
55 269 **isomerase; GPPS, geranyl pyrophosphate synthase; GES, plastid geraniol synthase; G8H,**  
56  
57 270 **geraniol 8-hydroxylase; GOR, 8-hydroxygeraniol oxidoreductase; CYC1, iridoid cyclase 1; 7-DLS,**  
58  
59 271 **7-deoxyloganetic acid synthase; 7-DLGT, 7-deoxyloganetic acid glucosyltransferase; 7-DLH, 7-**  
60  
61  
62  
63  
64  
65

1  
2  
3  
4  
5  
6  
7  
8  
9  
10  
11  
12  
13  
14  
15  
16  
17  
18  
19  
20  
21  
22  
23  
24  
25  
26  
27  
28  
29  
30  
31  
32  
33  
34  
35  
36  
37  
38  
39  
40  
41  
42  
43  
44  
45  
46  
47  
48  
49  
50  
51  
52  
53  
54  
55  
56  
57  
58  
59  
60  
61  
62  
63  
64  
65

272 deoxyloganic acid hydroxylase; SLAS, secologanic acid synthase; TDC, tryptophan decarboxylase.

273 **(B) Physical clustering of homologs of genes involved in the methylerythritol phosphate,**

274 **iridoid, and alkaloid biosynthetic pathways of *Catharanthus roseus* on scaffold 151 of *C.***

275 ***acuminata*.** GOR: 8-hydroxygeraniol oxidoreductase; NMT: 16-hydroxy-2,3-dihydro-3-

276 hydroxytabersonine N-methyltransferase; 7DLH: 7-deoxyloganic acid 7-hydroxylase; IPP2:

277 isopentenyl diphosphate isomerase II. Gene IDs are below the arrows.

278 **Table 1. Input libraries and sequences for *de novo* assembly of the *Camptotheca acuminata***  
 279 **genome.**

| BioProject ID                                                            | BioSample ID | Fragment size (bp) | No. of cleaned read pairs | Use                  |
|--------------------------------------------------------------------------|--------------|--------------------|---------------------------|----------------------|
| <b>Paired end</b>                                                        |              |                    |                           |                      |
| PRJNA361128                                                              | SAMN06220985 | 180                | 96,955,546                | ALLPATHS-LG assembly |
| PRJNA361128                                                              | SAMN06220986 | 268                | 89,381,055                | ALLPATHS-LG assembly |
| PRJNA361128                                                              | SAMN06220987 | 352                | 61,207,691                | GapCloser            |
| PRJNA361128                                                              | SAMN06220988 | 429                | 50,688,562                | GapCloser            |
| PRJNA361128                                                              | SAMN06220989 | 585                | 21,856,610                | GapCloser            |
| PRJNA361128                                                              | SAMN06220990 | 609                | 22,217,954                | GapCloser            |
| <b>Mate pair</b>                                                         |              |                    |                           |                      |
| PRJNA361128                                                              | SAMN06220991 | 8,111              | 9,923,643                 | ALLPATHS-LG assembly |
| PRJNA361128                                                              | SAMN06220992 | 7,911              | 7,652,519                 | ALLPATHS-LG assembly |
| PRJNA361128                                                              | SAMN06220993 | 1,377              | 12,800,554                | ALLPATHS-LG assembly |
| PRJNA361128                                                              | SAMN06220994 | 3,179              | 13,138,503                | ALLPATHS-LG assembly |
| PRJNA361128                                                              | SAMN06220995 | 8,879              | 13,599,241                | ALLPATHS-LG assembly |
| All libraries were sequenced in paired end mode generating 150 nt reads. |              |                    |                           |                      |



1  
2  
3  
4  
5  
6  
7  
8  
9  
10  
11  
12  
13  
14  
15  
16  
17  
18  
19  
20  
21  
22  
23  
24  
25  
26  
27  
28  
29  
30  
31  
32  
33  
34  
35  
36  
37  
38  
39  
40  
41  
42  
43  
44  
45  
46  
47  
48  
49  
50  
51  
52  
53  
54  
55  
56  
57  
58  
59  
60  
61  
62  
63  
64  
65

280 **Table 2. Metrics of the final assembly of *Camptotheca acuminata* genome.**

| Metric                       | Value            |
|------------------------------|------------------|
| Total scaffold length (bp)   | 403,174,860      |
| Total no. of scaffolds (bp)  | 1,394            |
| Maximum scaffold length (bp) | 8,423,530        |
| Minimum scaffold length (bp) | 1,002            |
| N50 scaffold size (bp)       | 1,751,747        |
| N50 contig size (bp)         | 107,594          |
| No. Ns                       | 3,772,191 (0.9%) |
| No. gaps                     | 3,825            |

14  
15  
16  
17  
18  
19  
20  
21  
22  
23  
24  
25  
26  
27  
28  
29  
30  
31  
32  
33  
34  
35  
36  
37  
38  
39  
40  
41  
42  
43  
44  
45  
46  
47  
48  
49  
50  
51  
52  
53  
54  
55  
56  
57  
58  
59  
60  
61  
62  
63  
64  
65

**Table 3. Identification of candidate camptothecin biosynthetic pathway genes in the *Camptotheca acuminata* genome as revealed by sequence identity and coverage with characterized genes from the 2-C-methyl-D-erythritol 4-phosphate/1-deoxy-D-xylulose 5-phosphate and iridoid biosynthetic pathways from *Catharanthus roseus*.**

| Description                                                             | Abbreviation | Protein    | Camptotheca Gene ID | % coverage | % identity |
|-------------------------------------------------------------------------|--------------|------------|---------------------|------------|------------|
| <b>MEP</b>                                                              |              |            |                     |            |            |
| 1-deoxy-D-xylulose 5-phosphate synthase 2                               | DXS          | ABI35993.1 | Cac_g024944.t1      | 98         | 77.60      |
| 1-deoxy-D-xylulose-5-phosphate reductoisomerase                         | DXR          | AAF65154.1 | Cac_g016318.t1      | 100        | 88.82      |
| 4-diphosphocytidyl-methylerythritol 2-phosphate synthase                | CMS          | ACI16377.1 | Cac_g018722.t1      | 88         | 77.82      |
| 4-diphosphocytidyl-2-C-methyl-D-erythritol kinase                       | CMK          | ABI35992.1 | Cac_g021688.t1      | 99         | 76.17      |
| 2C-methyl-D-erythritol 2,4-cyclodiphosphate synthase                    | MCS          | AAF65155.1 | Cac_g008169.t1      | 100        | 73.77      |
| GCPE protein                                                            | HDS          | AAO24774.1 | Cac_g022763.t1      | 100        | 88.65      |
| 1-hydroxy-2-methyl-butenyl 4-diphosphate reductase                      | HDR          | ABI30631.1 | Cac_g014659.t1      | 100        | 83.77      |
| plastid isopentenyl pyrophosphate:dimethylallyl pyrophosphate isomerase | IPI          | ABW98669.1 | Cac_g008847.t1      | 76         | 91.06      |
| geranyl pyrophosphate synthase                                          | GPPS         | ACC77966.1 | Cac_g026508.t1      | 51         | 76.50      |
| <b>Iridoid</b>                                                          |              |            |                     |            |            |
| geraniol 8-hydroxylase                                                  | G8H          | CAC80883.1 | Cac_g017987.t1      | 95         | 76.71      |
| 8-hydroxygeraniol oxidoreductase                                        | GOR          | AHK60836.1 | Cac_g027560.t1      | 100        | 71.69      |
| iridoid synthase                                                        | ISY          | AFW98981.1 | Cac_g006027.t1      | 100        | 65.65      |

14  
15  
16  
17  
18  
19  
20  
21  
22  
23  
24  
25  
26  
27  
28  
29  
30  
31  
32  
33  
34  
35  
36  
37  
38  
39  
40  
41  
42  
43  
44  
45  
46  
47  
48  
49  
50  
51  
52  
53  
54  
55  
56  
57  
58  
59  
60  
61  
62  
63  
64  
65

---

|                                         |       |            |                |     |       |
|-----------------------------------------|-------|------------|----------------|-----|-------|
| iridoid oxidase                         | IO    | AHK60833.1 | Cac_g032709.t1 | 97  | 78.44 |
| UDP-glucose iridoid glucosyltransferase | 7DLGT | BAO01109.1 | Cac_g008744.t1 | 100 | 77.11 |
| 7-deoxyloganic acid 7-hydroxylase       | 7DLH  | AGX93062.1 | Cac_g012663.t1 | 96  | 69.58 |
| loganic acid methyltransferase          | LAMT  | ABW38009.1 | Cac_g005179.t1 | 95  | 53.91 |
| secologanin synthase                    | SLS   | AAA33106.1 | Cac_g012666.t1 | 99  | 64.94 |

---

---

Note: Only the top hit from the BLAST search is presented.

---

---

1  
2  
3  
4 284 **References**  
5  
6  
7

- 8 285 1. Angiosperm Phylogeny Group III. An update of the Angiosperm Phylogeny Group classification  
9 286 for the orders and families of flowering plants: APG III. *Botanical Journal of the Linnean Society*.  
10 287 2009;161:105-21.
- 11 288 2. Lorence A, Nessler, C.L. Molecules of Interest: Camptothecin, over four decades of surprising  
12 289 findings. *Phytochemistry*. 2004; 65:2735–49.
- 13 290 3. World Health Organization: 19th WHO Model List of Essential Medicines.  
14 291 [http://www.who.int/medicines/publications/essentialmedicines/EML2015\\_8-May-15.pdf](http://www.who.int/medicines/publications/essentialmedicines/EML2015_8-May-15.pdf).  
15 292 Accessed 26 March 2017.
- 16 293 4. Gongora-Castillo E, Childs KL, Fedewa G, Hamilton JP, Liscombe DK, Magallanes-Lundback M, et  
17 294 al. Development of transcriptomic resources for interrogating the biosynthesis of monoterpene  
18 295 indole alkaloids in medicinal plant species. *PLoS One*. 2012;7 12:e52506.  
19 296 doi:10.1371/journal.pone.0052506.
- 20 297 5. Sun Y, Luo H, Li Y, Sun C, Song J, Niu Y, et al. Pyrosequencing of the *Camptotheca acuminata*  
21 298 transcriptome reveals putative genes involved in camptothecin biosynthesis and transport. *BMC*  
22 299 *Genomics*. 2011;12:533. doi:10.1186/1471-2164-12-533.
- 23 300 6. Yamazaki M, Mochida K, Asano T, Nakabayashi R, Chiba M, Udomson N, et al. Coupling deep  
24 301 transcriptome analysis with untargeted metabolic profiling in *Ophiorrhiza pumila* to further the  
25 302 understanding of the biosynthesis of the anti-cancer alkaloid camptothecin and anthraquinones.  
26 303 *Plant Cell Physiol*. 2013;54 5:686-96. doi:10.1093/pcp/pct040.
- 27 304 7. Martin M. Cutadapt removes adapter sequences from high-throughput sequencing reads.  
28 305 *EMBnetjournal*. 2011;17 1 doi:<http://dx.doi.org/10.14806/ej.17.1.200>.
- 29 306 8. Haas BJ, Papanicolaou A, Yassour M, Grabherr M, Blood PD, Bowden J, et al. De novo transcript  
30 307 sequence reconstruction from RNA-seq using the Trinity platform for reference generation and  
31 308 analysis. *Nat Protoc*. 2013;8 8:1494-512. doi:10.1038/nprot.2013.084.
- 32 309 9. Altschul SF, Madden TL, Schaffer AA, Zhang J, Zhang Z, Miller W, et al. Gapped BLAST and PSI-  
33 310 BLAST: a new generation of protein database search programs. *Nucleic Acids Res*. 1997;25  
34 311 17:3389-402.
- 35 312 10. Camacho C, Coulouris G, Avagyan V, Ma N, Papadopoulos J, Bealer K, et al. BLAST+: architecture  
36 313 and applications. *BMC Bioinformatics*. 2009;10:421. doi:10.1186/1471-2105-10-421.
- 37 314 11. FastQC. <http://www.bioinformatics.babraham.ac.uk/projects/fastqc/>. Accessed 26 March 2017.
- 38 315 12. Saghai-Marooif MA, Soliman KM, Jorgensen RA and Allard RW. Ribosomal DNA spacer-length  
39 316 polymorphisms in barley - Mendelian inheritance, chromosomal location, and population-  
40 317 dynamics. *PRoc Natl Acad USA*. 1984;81 24:8014-8. doi:Doi 10.1073/Pnas.81.24.8014.
- 41 318 13. Hardigan MA, Crisovan E, Hamilton JP, Kim J, Laimbeer P, Leisner CP, et al. Genome Reduction  
42 319 Uncovers a Large Dispensable Genome and Adaptive Role for Copy Number Variation in  
43 320 Asexually Propagated *Solanum tuberosum*. *Plant Cell*. 2016;28 2:388-405.  
44 321 doi:10.1105/tpc.15.00538.
- 45 322 14. Leggett RM, Clavijo BJ, Clissold L, Clark MD and Caccamo M. NextClip: an analysis and read  
46 323 preparation tool for Nextera Long Mate Pair libraries. *Bioinformatics*. 2014;30 4:566-8.  
47 324 doi:10.1093/bioinformatics/btt702.
- 48 325 15. Gnerre S, Maccallum I, Przybylski D, Ribeiro FJ, Burton JN, Walker BJ, et al. High-quality draft  
49 326 assemblies of mammalian genomes from massively parallel sequence data. *Proc Natl Acad Sci U*  
50 327 *S A*. 2011;108 4:1513-8. doi:1017351108 [pii]10.1073/pnas.1017351108.  
51  
52  
53  
54  
55  
56  
57  
58  
59  
60  
61  
62  
63  
64  
65

1  
2  
3  
4  
5  
6  
7  
8  
9  
10  
11  
12  
13  
14  
15  
16  
17  
18  
19  
20  
21  
22  
23  
24  
25  
26  
27  
28  
29  
30  
31  
32  
33  
34  
35  
36  
37  
38  
39  
40  
41  
42  
43  
44  
45  
46  
47  
48  
49  
50  
51  
52  
53  
54  
55  
56  
57  
58  
59  
60  
61  
62  
63  
64  
65

16. Luo R, Liu B, Xie Y, Li Z, Huang W, Yuan J, et al. SOAPdenovo2: an empirically improved memory-efficient short-read de novo assembler. *Gigascience*. 2012;1 1:18. doi:10.1186/2047-217X-1-18.

17. Simao FA, Waterhouse RM, Ioannidis P, Kriventseva EV and Zdobnov EM. BUSCO: assessing genome assembly and annotation completeness with single-copy orthologs. *Bioinformatics*. 2015;31 19:3210-2. doi:10.1093/bioinformatics/btv351.

18. Han Y and Wessler SR. MITE-Hunter: a program for discovering miniature inverted-repeat transposable elements from genomic sequences. *Nucleic Acids Res*. 2010;38 22:e199. doi:10.1093/nar/gkq862.

19. Repeat Modeler. <http://www.repeatmasker.org/>. Accessed 26 March 2017.

20. Campbell MS, Law M, Holt C, Stein JC, Moghe GD, Hufnagel DE, et al. MAKER-P: a tool kit for the rapid creation, management, and quality control of plant genome annotations. *Plant Physiol*. 2014;164 2:513-24. doi:10.1104/pp.113.230144.

21. RepeatMasker. <http://www.repeatmasker.org/>. Accessed 26 March 2017.

22. Kim D, Pertea G, Trapnell C, Pimentel H, Kelley R and Salzberg SL. TopHat2: accurate alignment of transcriptomes in the presence of insertions, deletions and gene fusions. *Genome Biol*. 2013;14 4:R36. doi:10.1186/gb-2013-14-4-r36.

23. Grabherr MG, Haas BJ, Yassour M, Levin JZ, Thompson DA, Amit I, et al. Full-length transcriptome assembly from RNA-Seq data without a reference genome. *Nature Biotechnology*. 2011;29 7:644-52. doi:10.1038/nbt.1883.

24. Stanke M, Schoffmann O, Morgenstern B and Waack S. Gene prediction in eukaryotes with a generalized hidden Markov model that uses hints from external sources. *BMC Bioinformatics*. 2006;7:62.

25. Stanke M and Morgenstern B. AUGUSTUS: a web server for gene prediction in eukaryotes that allows user-defined constraints. *Nucleic Acids Res*. 2005;33 Web Server issue:W465-7. doi:10.1093/nar/gki458.

26. PASA2. <http://pasapipeline.github.io/>. Accessed 26 March 2017.

27. Haas BJ, Delcher AL, Mount SM, Wortman JR, Smith RK, Jr., Hannick LI, et al. Improving the Arabidopsis genome annotation using maximal transcript alignment assemblies. *Nucleic Acids Res*. 2003;31 19:5654-66.

28. Altschul SF and Gish W. Local alignment statistics. *Methods Enzymol*. 1996;266:460-80.

29. The Arabidopsis Information Resource. Arabidopsis.org. Accessed 26 March 2017.

30. Eddy SR. Accelerated Profile HMM Searches. *PLoS Comput Biol*. 2011;7 10:e1002195. doi:10.1371/journal.pcbi.1002195.

31. Sirikantaramas S, Yamazaki M and Saito K. Mutations in topoisomerase I as a self-resistance mechanism coevolved with the production of the anticancer alkaloid camptothecin in plants. *Proc Natl Acad Sci U S A*. 2008;105 18:6782-6. doi:0801038105 [pii]10.1073/pnas.0801038105.

32. Hanada K, Zou C, Lehti-Shiu MD, Shinozaki K and Shiu SH. Importance of lineage-specific expansion of plant tandem duplicates in the adaptive response to environmental stimuli. *Plant Physiol*. 2008;148 2:993-1003.

33. Emms DM and Kelly S. OrthoFinder: solving fundamental biases in whole genome comparisons dramatically improves orthogroup inference accuracy. *Genome Biol*. 2015;16:157. doi:10.1186/s13059-015-0721-2.

34. Nutzmans HW and Osbourn A. Gene clustering in plant specialized metabolism. *Curr Opin Biotechnol*. 2014;26:91-9. doi:10.1016/j.copbio.2013.10.009.

35. Kellner F, Kim J, Clavijo BJ, Hamilton JP, Childs KL, Vaillancourt B, et al. Genome-guided investigation of plant natural product biosynthesis. *Plant J*. 2015;82 4:680-92. doi:10.1111/tpj.12827.

1  
2  
3  
4  
5  
6  
7  
8  
9  
10  
11  
12  
13  
14  
15  
16  
17  
18  
19  
20  
21  
22  
23  
24  
25  
26  
27  
28  
29  
30  
31  
32  
33  
34  
35  
36  
37  
38  
39  
40  
41  
42  
43  
44  
45  
46  
47  
48  
49  
50  
51  
52  
53  
54  
55  
56  
57  
58  
59  
60  
61  
62  
63  
64  
65

36. Itkin M, Heinig U, Tzfadia O, Bhide AJ, Shinde B, Cardenas PD, et al. Biosynthesis of antinutritional alkaloids in solanaceous crops is mediated by clustered genes. *Science*. 2013;341:6142-175-9. doi:10.1126/science.1240230.

37. Sadre R, Magallanes-Lundback M, Pradhan S, Salim V, Mesberg A, Jones AD, et al. Metabolite Diversity in Alkaloid Biosynthesis: A Multilane (Diastereomer) Highway for Camptothecin Synthesis in *Camptotheca acuminata*. *Plant Cell*. 2016;28 8:1926-44. doi:10.1105/tpc.16.00193.

38. DellaPenna D and O'Connor SE. Plant science. Plant gene clusters and opiates. *Science*. 2012;336:6089:1648-9. doi:10.1126/science.1225473.

39. Chae L, Kim T, Nilo-Poyanco R and Rhee SY. Genomic signatures of specialized metabolism in plants. *Science*. 2014;344 6183:510-3. doi:10.1126/science.1252076.

40. Kliebenstein DJ. A role for gene duplication and natural variation of gene expression in the evolution of metabolism. *PLoS One*. 2008;3 3:e1838. doi:10.1371/journal.pone.0001838.

41. Kliebenstein DJ, Lambrix VM, Reichelt M, Gershenzon J and Mitchell-Olds T. Gene duplication in the diversification of secondary metabolism: tandem 2-oxoglutarate-dependent dioxygenases control glucosinolate biosynthesis in *Arabidopsis*. *Plant Cell*. 2001;13 3:681-93.

42. Zhao D, Hamilton JP, Pham GM, Crisovan E, Wiegert-Rininger K, Vaillancourt B, et al. Supporting data for "De novo genome assembly of *Camptotheca acuminata*, a natural source of the anti-cancer compound camptothecin." Dryad Digital Repository. 2017. <http://dx.doi.org/10.5061/dryad.nc8qr>

43. The Medicinal Plant Genomics Resource. <http://medicinalplantgenomics.msu.edu/>. Accessed 26 March 2017.

398 **Additional files**

399 **Supplemental tables:**

400 **Table S1. RNA-sequencing libraries used in this study.**

| BioProject ID | BioSample ID | Tissue         | No. cleaned |                 |
|---------------|--------------|----------------|-------------|-----------------|
|               |              |                | reads       | Estimated bases |
| PRJNA80029    | SAMN00255206 | mature leaf    | 90,862,580  | 5,451,754,800   |
| PRJNA80029    | SAMN00255207 | immature bark  | 84,537,958  | 5,072,277,480   |
| PRJNA80029    | SAMN00255208 | root           | 88,940,668  | 5,336,440,080   |
| PRJNA80029    | SAMN00255215 | young flower   | 71,435,806  | 4,286,148,360   |
| PRJNA80029    | SAMN00255216 | immature fruit | 84,250,338  | 5,055,020,280   |
| PRJNA80029    | SAMN00255217 | mature fruit   | 47,811,342  | 2,868,680,520   |
| PRJNA80029    | SAMN00255222 | cotyledons     | 74,037,722  | 4,442,263,320   |
| PRJNA80029    | SAMN00255223 | upper stem     | 76,105,786  | 4,566,347,160   |
| PRJNA80029    | SAMN00255224 | lower stem     | 72,680,940  | 4,360,856,400   |
| PRJNA361128   | SAMN06229771 | root           | 55,435,804  | 7,224,198,331   |
| Total         |              |                | 771,909,254 | 49,309,244,481  |

401  
402 **Table S2. Orthologous groups of genes from *Camptotheca acuminata* and three other plant**  
403 **species.**

404 This is available as a separate XLS file

1  
2  
3  
4  
5  
6  
7  
8  
9  
10  
11  
12  
13  
14  
15  
16  
17  
18  
19  
20  
21  
22  
23  
24  
25  
26  
27  
28  
29  
30  
31  
32  
33  
34  
35  
36  
37  
38  
39  
40  
41  
42  
43  
44  
45  
46  
47  
48  
49  
50  
51  
52  
53  
54  
55  
56  
57  
58  
59  
60  
61  
62  
63  
64  
65

405

406 **Table S3. P450 paralogous genes in *Camptotheca acuminata*.**

407 This is available as a separate XLS file

408 **Table S4. Expression abundance matrix (fragments per kbp exon model per million mapped**  
409 **reads) from different tissues of *Camptotheca acuminata*.**

410 This is available as a separate XLS file

411



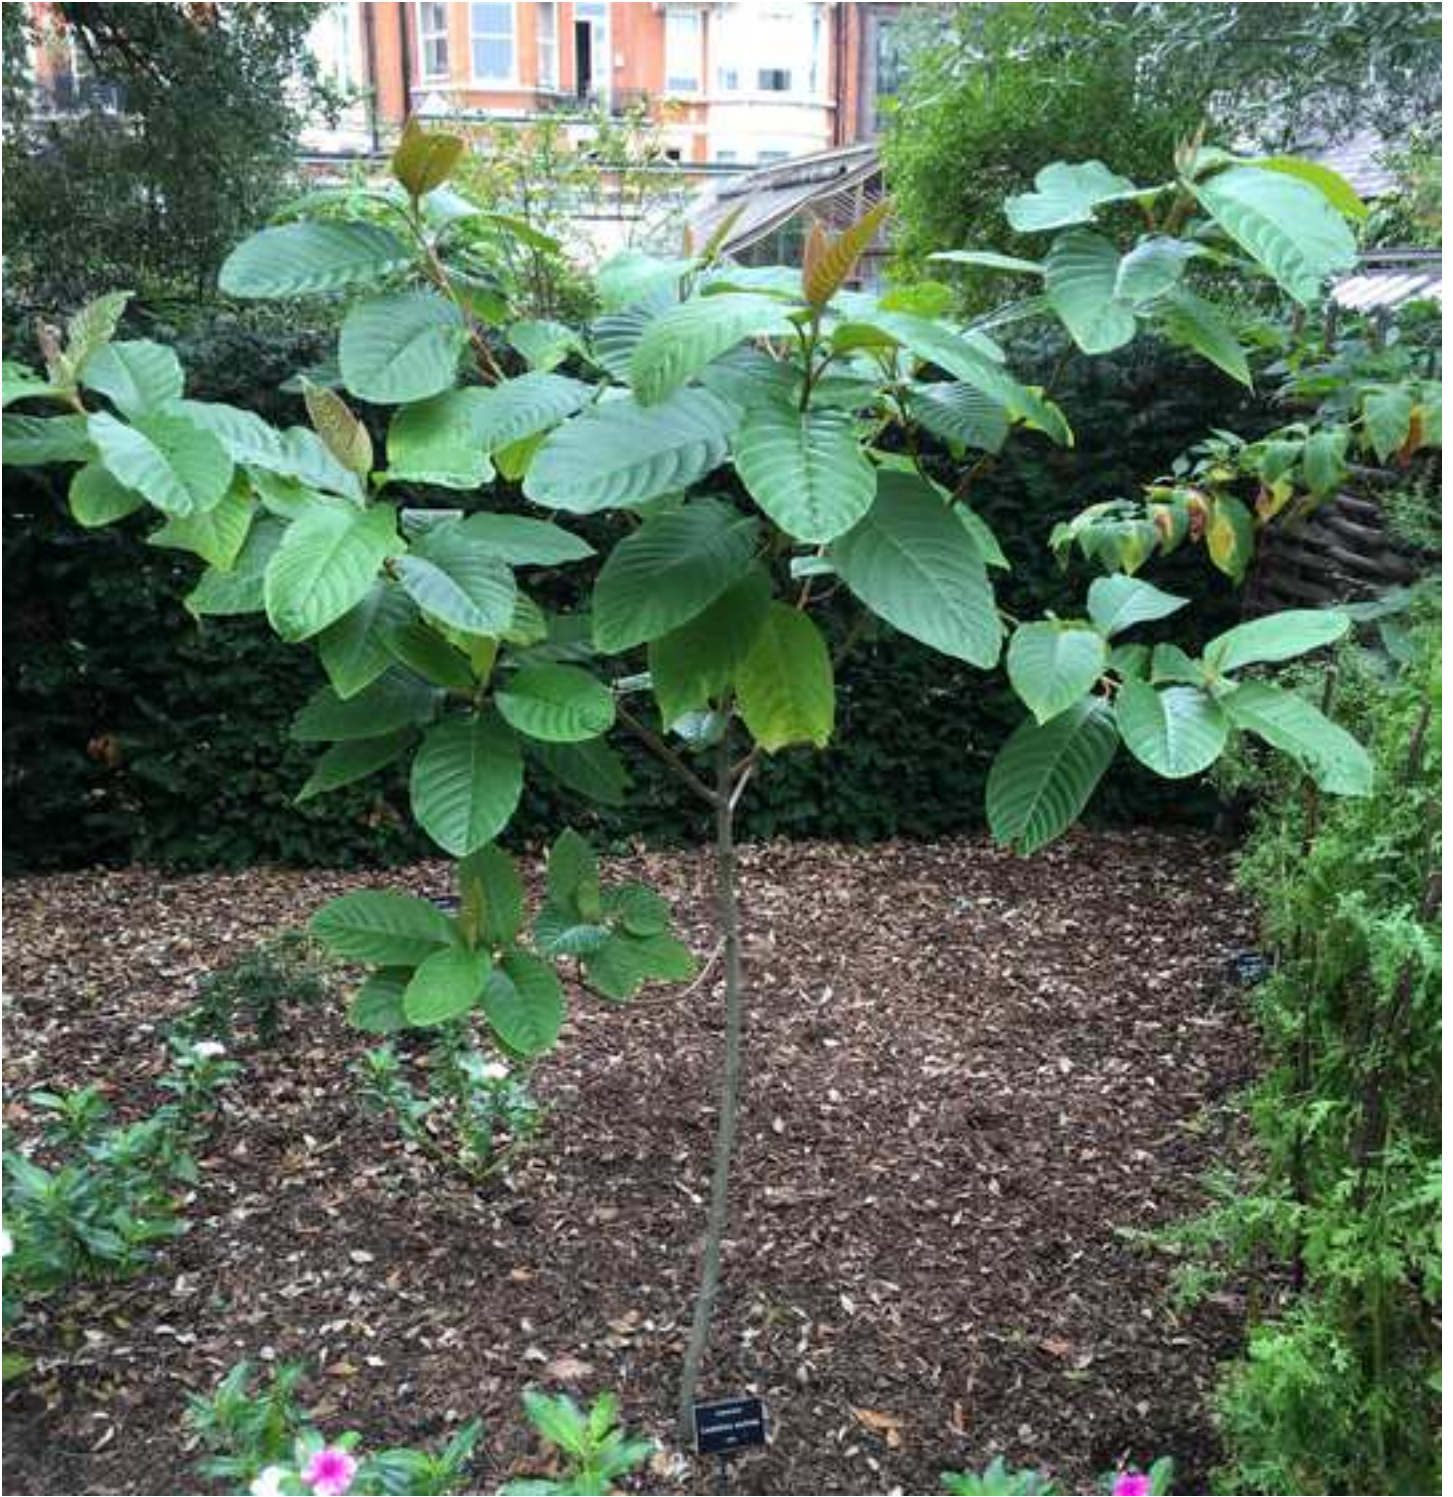

Figure 2

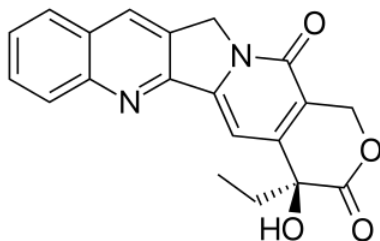

B

|                                   |                                                                                                                                                                                                                                                                                                                    |
|-----------------------------------|--------------------------------------------------------------------------------------------------------------------------------------------------------------------------------------------------------------------------------------------------------------------------------------------------------------------|
| Homo sapiens AAA61207             | <b>F</b> RG <b>R</b> GN <b>H</b> PK <b>M</b> GM <b>L</b> KRR <b>I</b> MP <b>E</b> DI <b>I</b> NC <b>S</b> DK <b>A</b> K <b>V</b> SP <b>P</b> P-G <b>H</b> K <b>W</b> KE <b>V</b> R <b>H</b> DN <b>K</b> V <b>T</b> W <b>L</b> SV <b>T</b> EN <b>I</b> Q <b>S</b> -S 423                                            |
| Camptotheca acuminata BAG31376    | <b>F</b> RG <b>R</b> GE <b>H</b> PK <b>M</b> GM <b>L</b> K <b>K</b> C <b>I</b> R <b>F</b> SD <b>I</b> T <b>I</b> N <b>I</b> G <b>K</b> DA <b>P</b> IE <b>C</b> PI <b>P</b> GES <b>W</b> KE <b>I</b> R <b>H</b> DN <b>V</b> T <b>L</b> AF <b>W</b> ND <b>P</b> IK <b>P</b> RE 556                                   |
| Camptotheca acuminata Cac_g012488 | <b>F</b> RG <b>R</b> GE <b>H</b> PK <b>M</b> GM <b>L</b> K <b>K</b> C <b>I</b> R <b>F</b> SD <b>I</b> T <b>I</b> N <b>I</b> G <b>K</b> DA <b>P</b> IE <b>C</b> PI <b>P</b> GES <b>W</b> KE <b>I</b> R <b>H</b> DN <b>V</b> T <b>L</b> AF <b>W</b> ND <b>P</b> IK <b>P</b> RE 555                                   |
| Camptotheca acuminata Cac_g021767 | <b>F</b> RG <b>R</b> GE <b>H</b> PK <b>M</b> GM <b>L</b> K <b>L</b> I <b>R</b> PS <b>D</b> I <b>T</b> I <b>N</b> I <b>G</b> K <b>D</b> A <b>P</b> IE <b>C</b> PI <b>P</b> GES <b>W</b> KE <b>I</b> R <b>H</b> DN <b>V</b> T <b>L</b> AF <b>W</b> ND <b>P</b> IN <b>P</b> RE 560                                    |
| Ophiorrhiza pumila BAG31373       | <b>F</b> RG <b>R</b> GE <b>H</b> PK <b>V</b> KL <b>K</b> K <b>R</b> IR <b>P</b> RD <b>I</b> T <b>I</b> N <b>I</b> G <b>K</b> DA <b>P</b> IE <b>C</b> PI <b>P</b> GER <b>W</b> KE <b>V</b> R <b>N</b> DN <b>V</b> T <b>L</b> AY <b>W</b> ND <b>P</b> V <b>N</b> L <b>K</b> E 587                                    |
| Ophiorrhiza liukuensis BAG31374   | <b>F</b> RG <b>R</b> GE <b>H</b> PK <b>M</b> GM <b>L</b> K <b>K</b> R <b>I</b> R <b>P</b> RD <b>I</b> T <b>I</b> N <b>I</b> G <b>K</b> DA <b>P</b> IE <b>C</b> PI <b>P</b> GER <b>W</b> KE <b>V</b> R <b>N</b> DN <b>V</b> T <b>L</b> AF <b>W</b> ND <b>P</b> IN <b>Q</b> K <b>E</b> 587                           |
| Ophiorrhiza japonica BAG31375     | <b>F</b> RG <b>R</b> GE <b>H</b> PK <b>M</b> GM <b>L</b> K <b>K</b> R <b>I</b> R <b>P</b> RD <b>I</b> T <b>I</b> N <b>I</b> G <b>K</b> DA <b>P</b> IE <b>C</b> PI <b>P</b> GER <b>W</b> KE <b>V</b> R <b>N</b> DN <b>V</b> T <b>L</b> AF <b>W</b> ID <b>P</b> IN <b>Q</b> K <b>E</b> 588                           |
| Catharanthus roseus BAG31377      | <b>F</b> RG <b>R</b> GE <b>H</b> PK <b>M</b> GM <b>L</b> K <b>K</b> R <b>I</b> R <b>P</b> CD <b>I</b> T <b>I</b> N <b>I</b> G <b>K</b> DA <b>P</b> IE <b>C</b> VP <b>GER</b> W <b>KE</b> V <b>R</b> H <b>DN</b> V <b>T</b> L <b>AF</b> W <b>ND</b> P <b>IN</b> PE <b>K</b> E 570                                   |
| Arabidopsis thaliana NP_200341    | <b>F</b> RG <b>R</b> GE <b>H</b> PK <b>M</b> GM <b>L</b> K <b>K</b> R <b>I</b> H <b>P</b> CE <b>I</b> T <b>L</b> N <b>I</b> G <b>K</b> DA <b>P</b> IE <b>C</b> PI <b>A</b> GER <b>W</b> KE <b>V</b> R <b>H</b> DN <b>V</b> T <b>L</b> AF <b>W</b> AD <b>P</b> IN <b>P</b> KE 575                                   |
| Saccharomyces cerevisiae AAA35162 | <b>F</b> X <b>G</b> R <b>G</b> A <b>H</b> P <b>T</b> G <b>L</b> K <b>L</b> R <b>R</b> V <b>N</b> P <b>E</b> D <b>I</b> V <b>L</b> N <b>L</b> S <b>K</b> D <b>A</b> P <b>V</b> P <b>A</b> P <b>E</b> -G <b>H</b> K <b>W</b> GE <b>I</b> R <b>H</b> DN <b>V</b> Q <b>L</b> AM <b>W</b> REN <b>E</b> F <b>N</b> S 355 |

Direct/indirect camptothecin binding

|                                   |                                                                                                                                                                                                                                                                              |
|-----------------------------------|------------------------------------------------------------------------------------------------------------------------------------------------------------------------------------------------------------------------------------------------------------------------------|
| Homo sapiens AAA61207             | <b>E</b> SK <b>K</b> K <b>V</b> Q <b>R</b> L <b>E</b> E <b>Q</b> L <b>M</b> K <b>L</b> E <b>V</b> Q <b>A</b> T <b>D</b> R <b>E</b> N <b>K</b> Q <b>I</b> A <b>L</b> G <b>T</b> S <b>K</b> I <b>N</b> V <b>L</b> D <b>P</b> R <b>I</b> T <b>V</b> A <b>W</b> C <b>K</b> 734   |
| Camptotheca acuminata BAG31376    | <b>E</b> AL <b>E</b> R <b>K</b> I <b>G</b> Q <b>T</b> NA <b>K</b> IE <b>K</b> M <b>E</b> R <b>D</b> K <b>E</b> T <b>K</b> E <b>G</b> L <b>K</b> T <b>I</b> A <b>L</b> G <b>T</b> S <b>K</b> I <b>S</b> V <b>L</b> D <b>P</b> R <b>I</b> T <b>V</b> A <b>W</b> C <b>K</b> 864 |
| Camptotheca acuminata Cac_g012488 | <b>E</b> AL <b>E</b> R <b>K</b> I <b>G</b> Q <b>T</b> NA <b>K</b> IE <b>K</b> M <b>E</b> R <b>D</b> K <b>E</b> T <b>K</b> E <b>G</b> L <b>K</b> T <b>I</b> A <b>L</b> G <b>T</b> S <b>K</b> I <b>S</b> V <b>L</b> D <b>P</b> R <b>I</b> T <b>V</b> A <b>W</b> C <b>K</b> 863 |
| Camptotheca acuminata Cac_g021767 | <b>E</b> AL <b>G</b> R <b>K</b> IA <b>Q</b> T <b>S</b> A <b>K</b> IE <b>K</b> M <b>E</b> R <b>D</b> K <b>A</b> T <b>K</b> E <b>G</b> L <b>K</b> T <b>V</b> A <b>L</b> S <b>T</b> S <b>K</b> I <b>S</b> V <b>L</b> D <b>P</b> R <b>I</b> T <b>V</b> A <b>W</b> C <b>K</b> 868 |
| Ophiorrhiza pumila BAG31373       | <b>E</b> AL <b>E</b> R <b>K</b> IA <b>Q</b> T <b>N</b> A <b>K</b> IE <b>K</b> M <b>E</b> R <b>D</b> K <b>K</b> T <b>K</b> E <b>D</b> L <b>K</b> A <b>V</b> A <b>L</b> S <b>T</b> S <b>K</b> I <b>S</b> V <b>L</b> D <b>P</b> R <b>I</b> T <b>V</b> A <b>W</b> C <b>K</b> 896 |
| Ophiorrhiza liukuensis BAG31374   | <b>E</b> S <b>L</b> E <b>R</b> K <b>IA</b> Q <b>T</b> NA <b>K</b> IE <b>K</b> M <b>E</b> R <b>D</b> K <b>K</b> T <b>K</b> E <b>D</b> L <b>K</b> A <b>V</b> A <b>L</b> S <b>T</b> S <b>K</b> I <b>S</b> V <b>L</b> D <b>P</b> R <b>I</b> T <b>V</b> A <b>W</b> C <b>K</b> 896 |
| Ophiorrhiza japonica BAG31375     | <b>E</b> AL <b>E</b> R <b>K</b> MA <b>I</b> NA <b>K</b> IE <b>K</b> M <b>E</b> R <b>D</b> K <b>E</b> T <b>K</b> E <b>D</b> L <b>K</b> T <b>V</b> A <b>L</b> G <b>T</b> S <b>K</b> I <b>N</b> V <b>L</b> D <b>P</b> R <b>I</b> T <b>V</b> A <b>W</b> C <b>K</b> 897           |
| Catharanthus roseus BAG31377      | <b>E</b> S <b>L</b> E <b>K</b> K <b>IA</b> Q <b>T</b> NA <b>K</b> IE <b>K</b> M <b>E</b> R <b>D</b> K <b>E</b> T <b>K</b> E <b>D</b> L <b>K</b> T <b>V</b> A <b>L</b> G <b>T</b> S <b>K</b> I <b>N</b> V <b>L</b> D <b>P</b> R <b>I</b> T <b>V</b> A <b>W</b> C <b>K</b> 880 |
| Arabidopsis thaliana NP_200341    | <b>N</b> A <b>W</b> E <b>K</b> IA <b>Q</b> Q <b>S</b> A <b>K</b> IE <b>K</b> M <b>E</b> R <b>D</b> M <b>H</b> T <b>K</b> E <b>D</b> L <b>K</b> T <b>V</b> A <b>L</b> G <b>T</b> S <b>K</b> I <b>N</b> V <b>L</b> D <b>P</b> R <b>I</b> T <b>V</b> A <b>W</b> C <b>K</b> 883  |
| Saccharomyces cerevisiae AAA35162 | <b>E</b> K <b>I</b> KA <b>Q</b> V <b>E</b> L <b>R</b> Q <b>I</b> Q <b>T</b> S <b>S</b> I <b>Q</b> L <b>K</b> D <b>K</b> E <b>N</b> S <b>Q</b> V <b>S</b> L <b>G</b> T <b>S</b> K <b>I</b> N <b>V</b> I <b>D</b> P <b>R</b> L <b>S</b> V <b>V</b> P <b>C</b> K 738            |

Direct/indirect camptothecin binding

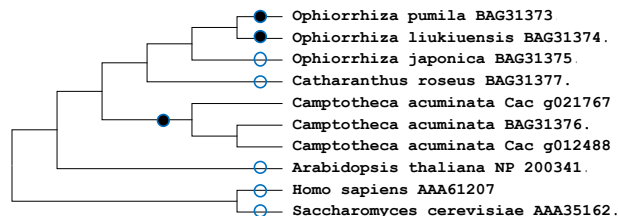

camptothecin

● present

○ absent

Figure 3

[Click here to download Figure\\_3.pptx](#)

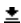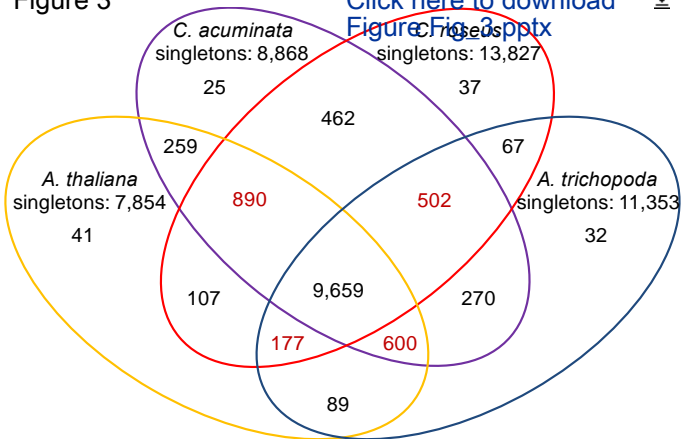

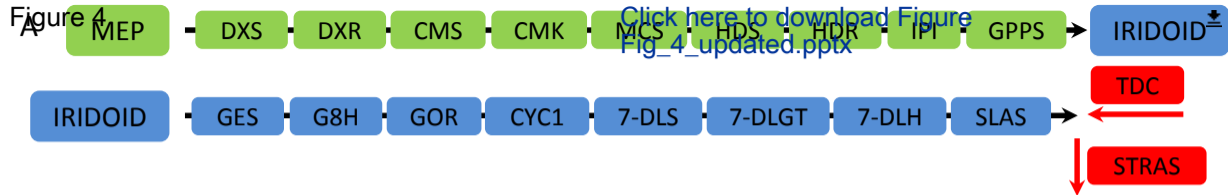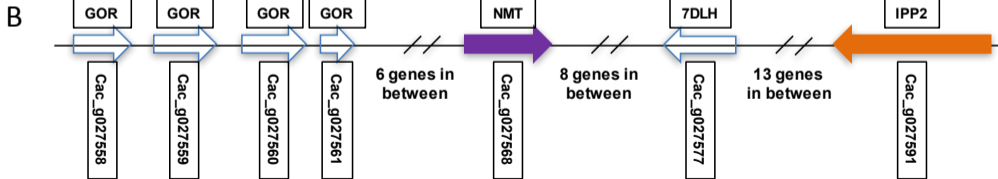

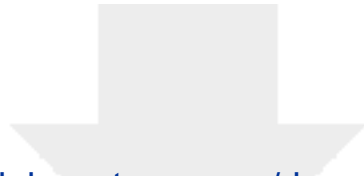

Click here to access/download  
**Supplementary Material**  
Supplemental\_Table\_2\_DZ.xlsx

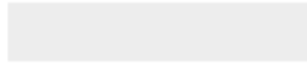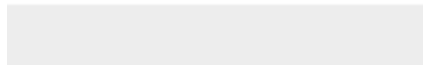



Click here to access/download  
**Supplementary Material**  
Supplemental\_Table\_3\_DZ.xlsx



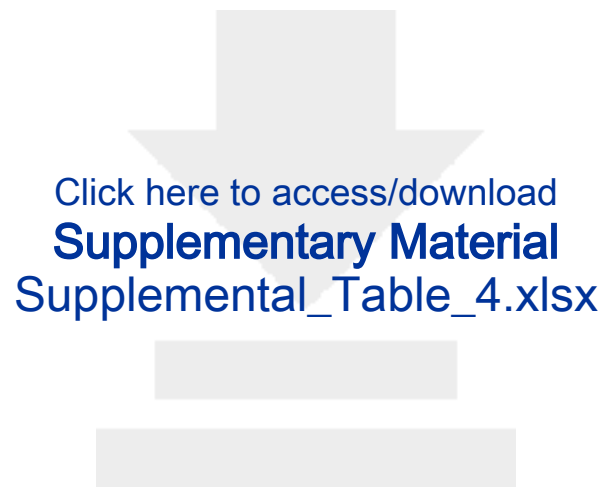

Supplement: gix065_giga-d-17-00067_revision-2.pdf [file gix065_giga-d-17-00067_revision-2.pdf]
